# Supplementary material
Source: PubMed Central journal article supplement (PMC4210141)
Supplement: ja508635v_si_001.pdf [file ja508635v_si_001.pdf]

## Cycloadditions of Cyclohexynes and Cyclopentyne

Jose M. Medina,<sup>†</sup> Travis C. McMahon,<sup>†</sup> Gonzalo Jiménez-Osés, K. N. Houk,\* and Neil K. Garg\*

*Department of Chemistry and Biochemistry, University of California  
Los Angeles, California 90095*

### Supporting Information – Table of Contents

|                                                                                 |            |
|---------------------------------------------------------------------------------|------------|
| <b>Materials and Methods.....</b>                                               | <b>S2</b>  |
| <b>Experimental Procedures.....</b>                                             | <b>S3</b>  |
| <b>A. Cyclohexyne Trapping Experiments .....</b>                                | <b>S3</b>  |
| <b>B. Synthesis of Cyclopentyne Precursor and Trapping Experiments .....</b>    | <b>S10</b> |
| <b>C. Synthesis of 3-Benzyloxy-Cyclohexyne Precursor .....</b>                  | <b>S13</b> |
| <b>D. 3-Benzyloxy-Cyclohexyne Trapping Experiments.....</b>                     | <b>S16</b> |
| <b>E. Derivatization of Triazole 16.....</b>                                    | <b>S18</b> |
| <b>Computational Methods.....</b>                                               | <b>S20</b> |
| <b>F. Bent’s Rule and Alkyne Distortion in Nucleophilic Additions.....</b>      | <b>S21</b> |
| <b>G. Energies, Enthalpies, Free Energies, and Entropies.....</b>               | <b>S25</b> |
| <b>H. Cartesian Coordinates at the PCM(THF)/MO6-2X/6-311+G(2d,p) level.....</b> | <b>S27</b> |
| <b>NMR Spectra .....</b>                                                        | <b>S39</b> |
| <sup>1</sup> H NMR Spectra .....                                                | S39        |
| <sup>13</sup> C NMR Spectra .....                                               | S66        |
| <b>References .....</b>                                                         | <b>S93</b> |

**Materials and Methods.** Unless stated otherwise, reactions were conducted in flame-dried glassware under an atmosphere of nitrogen using anhydrous solvents (freshly distilled or passed through activated alumina columns). All commercially obtained reagents were used as received unless otherwise specified. Cesium fluoride (CsF) was obtained from Strem Chemicals. *N*-phenyl-bis(trifluoromethanesulfonimide) was obtained from Oakwood Products, Inc. *N*-tert-butyl- $\alpha$ -phenylnitron, 1,3-dimethyl-2-imidazolidinone, and methyl 2-acetamidoacrylate were obtained from Alfa Aesar. Methyl thiolsalicylate was obtained from Acros Organics. Ethyl diazoacetate, L-selectride (1 M in THF), and (trimethylsilyl)diazomethane (1 M in Et<sub>2</sub>O) were obtained from Sigma Aldrich. *Caution: (trimethylsilyl)diazomethane is a flammable liquid that is very toxic when inhaled. Inhalation can cause pulmonary edema. It may be harmful if ingested or absorbed through the skin. It causes respiratory tract, skin, and eye irritation.* Trimethylsilyl chloride (TMSCl) was distilled over CaH<sub>2</sub> prior to use. Reaction temperatures were controlled using an IKAmag temperature modulator and, unless stated otherwise, reactions were performed at room temperature (rt, approximately 23 °C). Thin-layer chromatography (TLC) was conducted with EMD gel 60 F254 pre-coated plates (0.25 mm) and visualized using a combination of UV light and potassium permanganate staining. Silicycle Siliaflash P60 (particle size 0.040–0.063 mm) was used for flash column chromatography. <sup>1</sup>H NMR and 2D-NOESY spectra were recorded on Bruker spectrometers (at 500 MHz) and are reported relative to deuterated solvent signals. Data for <sup>1</sup>H NMR spectra are reported as follows: chemical shift ( $\delta$  ppm), multiplicity, coupling constant (Hz) and integration. <sup>13</sup>C NMR spectra were recorded on Bruker spectrometers (at 125 MHz) and are reported relative to deuterated solvent signals. Data for <sup>13</sup>C NMR spectra are reported in terms of chemical shift and, when necessary, multiplicity, and coupling constant (Hz). <sup>19</sup>F NMR spectra were recorded on Bruker spectrometers (at 376 MHz) and reported in terms of chemical shift. IR spectra were obtained using on a Perkin-Elmer 100 spectrometer and are reported in terms of frequency of absorption (cm<sup>-1</sup>). High-resolution mass spectra were obtained on Waters LCT Premier with ACQUITY LC and Thermo Scientific™ Exactive Mass Spectrometers with DART ID-CUBE.

## Experimental Procedures.

### A. Cyclohexyne Trapping Experiments.

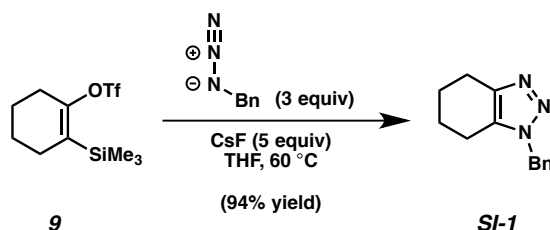

#### Representative Procedure (Preparation of triazole **SI-1** is used as an example).

**SI-1 (Table 1, entry 1).** To a stirred solution of silyltriflate **9**<sup>1</sup> (52.0 mg, 0.172 mmol) and benzylazide (0.8 M in PhH, 640  $\mu$ L, 0.512 mmol, 3.0 equiv) in THF (5.90 mL) was added CsF (0.130 g, 0.857 mmol, 5.0 equiv). The reaction vessel was purged with N<sub>2</sub> gas, sealed, and placed in a preheated aluminum heating block maintained at 60 °C for 24 h. After cooling to 23 °C, the reaction mixture was filtered over silica gel (EtOAc eluent, 12 mL). Evaporation under reduced pressure and further purification by preparative thin layer chromatography (3:2 EtOAc : hexanes) afforded triazole **SI-1** as a white amorphous solid (94% yield, average of two experiments). *R<sub>f</sub>* 0.30 (3:2 EtOAc : hexanes); <sup>1</sup>H NMR (500 MHz, CDCl<sub>3</sub>):  $\delta$  7.34–7.27 (m, 3H), 7.19–7.17 (app. d, *J* = 7.5, 2H), 5.41 (s, 2H), 2.72 (app. t, *J* = 5.0, 2H), 2.40 (app. t, *J* = 5.2, 2H), 1.78–1.72 (m, 4H); <sup>13</sup>C NMR (125 MHz, CDCl<sub>3</sub>):  $\delta$  144.0, 135.1, 132.1, 129.0, 128.3, 127.6, 51.9, 22.6, 22.5, 22.0, 20.2; IR (film): 2934, 2855, 1586, 1497, 1456, 1440 cm<sup>-1</sup>; HRMS-ESI (*m/z*) [M + H]<sup>+</sup> calcd for C<sub>13</sub>H<sub>16</sub>N<sub>3</sub>, 214.1339; found, 214.1332.

*Any modifications of the conditions shown in this representative procedure are specified in the following schemes, which depict all of the results shown in Tables 1 in addition to several other examples of cyclohexyne trapping.*

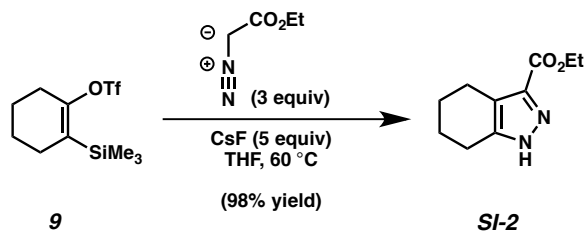

**SI-2 (Table 1, entry 2).** Purification by preparative thin layer chromatography (1:1 hexanes : EtOAc) afforded pyrazole **SI-2** as a faint yellow oil (98% yield, average of two experiments).  $R_f$  0.40 (1:1 hexanes : EtOAc);  $^1\text{H NMR}$  (500 MHz,  $\text{CDCl}_3$ ):  $\delta$  11.55 (br s, 1H), 4.34 (q,  $J = 7.0$ , 2H), 2.72 (t,  $J = 5.9$ , 2H), 2.68 (t,  $J = 5.9$ , 2H), 1.85–1.67 (m, 4H), 1.34 (t,  $J = 7.1$ , 3H);  $^{13}\text{C NMR}$  (125 MHz,  $\text{CDCl}_3$ ):  $\delta$  162.2, 145.3, 135.8, 119.6, 60.6, 23.0, 22.7, 22.2, 21.6, 14.4; IR (film): 2934, 2855, 1714, 1442, 1256, 1143  $\text{cm}^{-1}$ ; HRMS-ESI ( $m/z$ ) [ $\text{M} - \text{H}$ ] $^-$  calcd for  $\text{C}_{10}\text{H}_{13}\text{N}_2\text{O}_2$ , 193.0972; found, 193.0981.

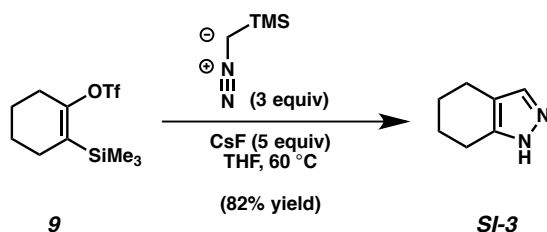

**SI-3 (Table 1, entry 3).** Purification by preparative thin layer chromatography (2:1 EtOAc : hexanes) afforded pyrazole **SI-3** as a colorless oil (82% yield, average of two experiments).  $R_f$  0.20 (2:1 EtOAc : hexanes);  $^1\text{H NMR}$  (500 MHz,  $\text{CDCl}_3$ ):  $\delta$  10.16 (br s, 1H), 7.30 (s, 1H), 2.68 (t,  $J = 6.1$ , 2H), 2.54 (t,  $J = 6.1$ , 2H), 1.86–1.78 (m, 2H), 1.78–1.70 (m, 2H);  $^{13}\text{C NMR}$  (125 MHz,  $\text{CDCl}_3$ ):  $\delta$  143.5, 132.2, 115.2, 23.6, 23.3, 22.2, 20.6; IR (film): 3155, 3103, 2923, 2849, 1593, 1444  $\text{cm}^{-1}$ ; HRMS-ESI ( $m/z$ ) [ $\text{M} + \text{H}$ ] $^+$  calcd for  $\text{C}_7\text{H}_{11}\text{N}_2$ , 123.0917; found, 123.0914.

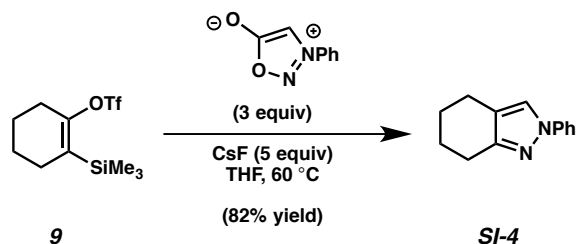

**SI-4 (Table 1, entry 4).** The sydnone trapping agent was synthesized using a known procedure.<sup>2</sup> Purification by preparative thin layer chromatography (9:1 hexanes : EtOAc) afforded pyrazole **SI-4** as a faint orange oil (82% yield, average of two experiments).  $R_f$  0.55 (9:1 hexanes : EtOAc);  $^1\text{H}$  NMR (500 MHz,  $\text{CDCl}_3$ ):  $\delta$  7.62 (dd,  $J = 8.7, 1.0$ , 2H), 7.61 (s, 1H), 7.40 (tt,  $J = 7.2, 1.8$ , 2H), 7.20 (tt,  $J = 7.3, 1.0$ , 1H), 2.78 (t,  $J = 6.4$ , 2H), 2.62 (t,  $J = 6.4$ , 2H), 1.89–1.83 (m, 2H), 1.81–1.75 (m, 2H);  $^{13}\text{C}$  NMR (125 MHz,  $\text{CDCl}_3$ ):  $\delta$  151.4, 140.6, 129.4, 125.6, 123.8, 118.7, 118.3, 23.6, 23.6, 23.5, 20.8; IR (film): 2928, 2855, 1598, 1570, 1504, 1376  $\text{cm}^{-1}$ ; HRMS-ESI ( $m/z$ ) [ $\text{M} + \text{H}$ ] $^+$  calcd for  $\text{C}_{13}\text{H}_{15}\text{N}_2$ , 199.1230; found, 199.1227.

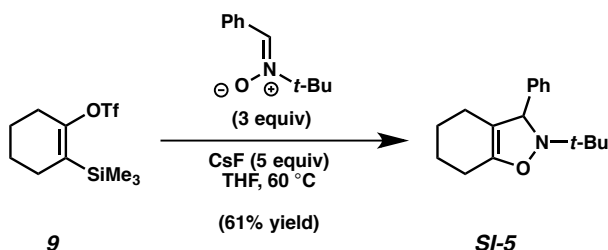

**SI-5 (Table 1, entry 5).** Purification by preparative thin layer chromatography (9:1 hexanes : EtOAc) afforded isoxazoline **SI-5** as a colorless oil (61% yield, average of two experiments).  $R_f$  0.65 (9:1 hexanes : EtOAc);  $^1\text{H}$  NMR (500 MHz,  $\text{CDCl}_3$ ):  $\delta$  7.36–7.28 (m, 4H), 7.22 (app. tt,  $J = 6.4, 1.7$ , 1H), 4.88 (s, 1H), 2.21–2.07 (m, 2H), 1.86–1.78 (m, 1H), 1.70–1.58 (m, 3H), 1.58–1.52 (m, 2H), 1.11 (s, 9H);  $^{13}\text{C}$  NMR (125 MHz,  $\text{CDCl}_3$ ):  $\delta$  148.0, 143.8, 128.4, 127.5, 127.1, 106.5, 70.6, 60.3, 25.2, 22.8, 22.7, 21.4, 21.2; IR (film): 2972, 2932, 1724, 1453, 1361, 1211  $\text{cm}^{-1}$ ; HRMS-ESI ( $m/z$ ) [ $\text{M} + \text{H}$ ] $^+$  calcd for  $\text{C}_{17}\text{H}_{24}\text{NO}$ , 258.1852; found, 258.1851.

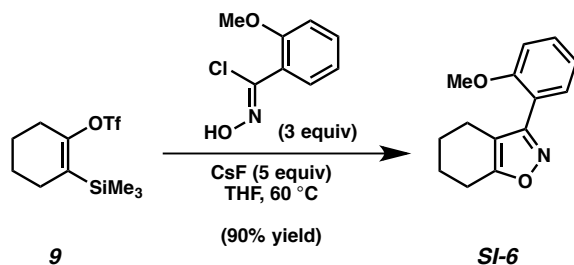

**SI-6 (Table 1, entry 6).** The chloro-oxime trapping agent was synthesized using a known procedure.<sup>3</sup> Purification by preparative thin layer chromatography (9:1 hexanes : EtOAc) afforded isoxazole **SI-6** as a faint yellow oil (90% yield, average of two experiments).  $R_f$  0.40 (9:1 hexanes : EtOAc);  $^1\text{H}$  NMR (500 MHz,  $\text{CDCl}_3$ ):  $\delta$  7.47 (dd,  $J = 7.5, 1.7$ , 1H), 7.41 (ddd,  $J = 8.3, 7.4, 1.7$ , 1H), 7.02 (dt,  $J = 7.5, 1.0$ , 1H), 6.98 (d,  $J = 8.3$ , 1H), 3.84 (s, 3H), 2.74 (tt,  $J = 6.4, 1.5$ , 2H), 2.39 (tt,  $J = 6.4, 1.5$ , 2H), 1.94–1.86 (m, 2H), 1.77–1.70 (m, 2H);  $^{13}\text{C}$  NMR (125 MHz,  $\text{CDCl}_3$ ):  $\delta$  167.8, 159.8, 157.4, 131.1, 131.0, 120.8, 118.9, 113.5, 111.1, 55.5, 22.9, 22.8, 22.3, 20.7; IR (film): 2937, 2856, 1634, 1604, 1510, 1470  $\text{cm}^{-1}$ ; HRMS-ESI ( $m/z$ ) [ $\text{M} + \text{H}$ ] $^+$  calcd for  $\text{C}_{14}\text{H}_{16}\text{NO}_2$ , 230.1176; found, 230.1179.

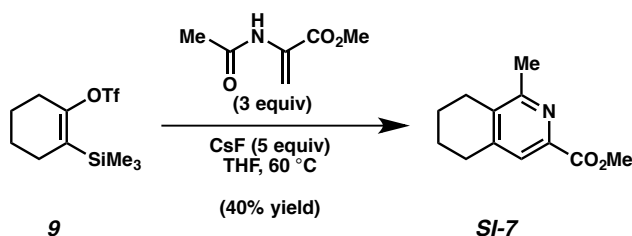

**SI-7.** Purification by preparative thin layer chromatography (9:1 hexanes : EtOAc) afforded tetrahydroisoquinoline **SI-7** as a colorless oil (40% yield, average of two experiments).  $R_f$  0.10 (9:1 hexanes : EtOAc);  $^1\text{H}$  NMR (500 MHz,  $\text{CDCl}_3$ ):  $\delta$  7.71 (s, 1H), 3.96 (s, 3H), 2.78 (t,  $J = 6.4$ , 2H), 2.66 (t,  $J = 6.4$ , 2H), 2.51 (s, 3H), 1.89–1.85 (m, 2H), 1.80–1.76 (m, 2H);  $^{13}\text{C}$  NMR (125 MHz,  $\text{CDCl}_3$ ):  $\delta$  166.6, 157.8, 146.9, 143.8, 135.6, 124.1, 52.8, 29.5, 26.5, 22.8, 22.6, 21.9; IR (film): 2935, 1741, 1717, 1590, 1436, 1214  $\text{cm}^{-1}$ ; HRMS-ESI ( $m/z$ ) [ $\text{M} + \text{H}$ ] $^+$  calcd for  $\text{C}_{12}\text{H}_{16}\text{NO}_2$ , 206.1176; found, 206.1173.

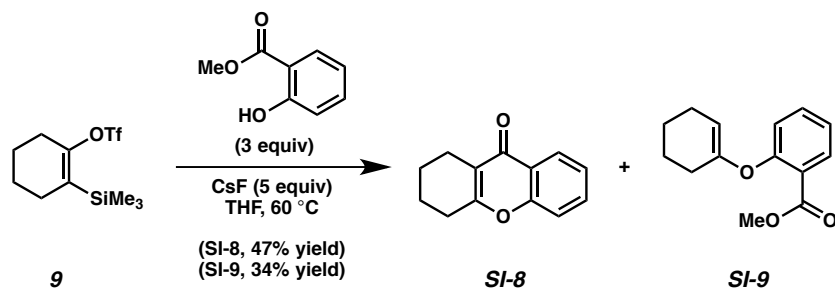

**SI-8 and SI-9.** Purification by preparative thin layer chromatography (9:1 hexanes : EtOAc) afforded adducts **SI-8** (47% yield, average of two experiments) and **SI-9** (34% yield, average of two experiments) as colorless oils. **SI-8**: *R<sub>f</sub>* 0.22 (9:1 hexanes : EtOAc); <sup>1</sup>H NMR (500 MHz, CDCl<sub>3</sub>): δ 8.19 (dd, *J* = 8.0, 1.7, 1H), 7.59 (ddd, *J* = 8.6, 7.1, 1.7, 1H), 7.36 (dd, *J* = 8.6, 0.6, 1H), 7.33 (ddd, *J* = 8.1, 7.1, 1.1, 1H), 2.66 (tt, *J* = 6.4, 1.5, 2H), 2.57 (tt, *J* = 6.4, 1.5, 2H), 1.90–1.84 (m, 2H), 1.78–1.73 (m, 2H); <sup>13</sup>C NMR (125 MHz, CDCl<sub>3</sub>): δ 177.8, 163.9, 156.0, 133.0, 125.8, 124.5, 123.3, 118.5, 117.7, 28.3, 22.0, 21.8, 21.1; IR (film): 2943, 2872, 1638, 1622, 1609, 1468 cm<sup>-1</sup>; HRMS-ESI (*m/z*) [M + H]<sup>+</sup> calcd for C<sub>13</sub>H<sub>13</sub>O<sub>2</sub>, 201.0910; found, 201.0910. **SI-9**: *R<sub>f</sub>* 0.55 (9:1 hexanes : EtOAc); <sup>1</sup>H NMR (500 MHz, CDCl<sub>3</sub>): δ 7.82 (dd, *J* = 7.8, 1.7, 1H), 7.44 (ddd, *J* = 8.2, 7.3, 1.7, 1H), 7.10 (dt, *J* = 7.6, 1.1, 1H), 7.06 (dd, *J* = 8.2, 1.1, 1H), 4.84 (tt, *J* = 3.9, 1.2, 1H), 3.88 (s, 3H), 2.26–2.21 (m, 2H), 2.07–2.00 (m, 2H), 1.78–1.72 (m, 2H), 1.61–1.55 (m, 2H); <sup>13</sup>C NMR (125 MHz, CDCl<sub>3</sub>): δ 166.6, 155.6, 154.2, 133.3, 131.7, 123.0, 122.9, 120.8, 105.5, 52.2, 26.9, 23.7, 23.0, 22.4; IR (film): 2932, 2843, 1733, 1716, 1602, 1227 cm<sup>-1</sup>; HRMS-ESI (*m/z*) [M + H]<sup>+</sup> calcd for C<sub>14</sub>H<sub>17</sub>O<sub>3</sub>, 233.1172; found, 233.1174.

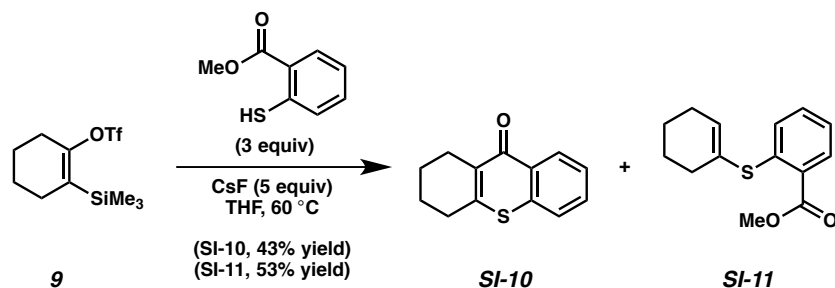

**SI-10 and SI-11.** Purification by preparative thin layer chromatography (9:1 hexanes : EtOAc) afforded adducts **SI-10** (43% yield, average of two experiments) and **SI-11** (53% yield, average of two experiments) as colorless oils. **SI-10**:  $R_f$  0.25 (9:1 hexanes : EtOAc);  $^1\text{H NMR}$  (500 MHz,  $\text{CDCl}_3$ ):  $\delta$  8.49 (dd,  $J = 8.1, 1.4$ , 1H), 7.54–7.44 (m, 3H), 2.73–2.65 (m, 4H), 1.88–1.80 (m, 4H);  $^{13}\text{C NMR}$  (125 MHz,  $\text{CDCl}_3$ ):  $\delta$  180.1, 147.4, 137.2, 131.5, 130.9, 130.5, 129.0, 127.0, 125.7, 31.3, 24.8, 22.4, 22.2; IR (film): 3065, 2934, 2867, 1605, 1581, 1548  $\text{cm}^{-1}$ ; HRMS-ESI ( $m/z$ )  $[\text{M} + \text{H}]^+$  calcd for  $\text{C}_{13}\text{H}_{13}\text{OS}$ , 217.0682; found, 217.0682. **SI-11**:  $R_f$  0.55 (9:1 hexanes : EtOAc);  $^1\text{H NMR}$  (500 MHz,  $\text{CDCl}_3$ ):  $\delta$  7.93 (dd,  $J = 7.9, 1.5$ , 1H), 7.38 (ddd,  $J = 8.1, 7.3, 1.5$ , 1H), 7.24 (dd,  $J = 8.1, 0.8$ , 1H), 7.14 (ddd,  $J = 8.4, 7.9, 1.2$ , 1H), 6.39–6.37 (m, 1H), 3.91 (s, 3H), 2.27–2.23 (m, 2H), 2.18–2.15 (m, 2H), 1.75–1.70 (m, 2H), 1.68–1.63 (m, 2H);  $^{13}\text{C NMR}$  (125 MHz,  $\text{CDCl}_3$ ):  $\delta$  167.0, 141.4, 139.6, 132.2, 131.4, 130.1, 127.8, 127.2, 124.3, 52.2, 30.4, 27.3, 23.8, 21.6; IR (film): 2931, 1717, 1588, 1562, 1434, 1249  $\text{cm}^{-1}$ ; HRMS-ESI ( $m/z$ )  $[\text{M} + \text{H}]^+$  calcd for  $\text{C}_{14}\text{H}_{17}\text{O}_2\text{S}$ , 249.0944; found, 249.0945.



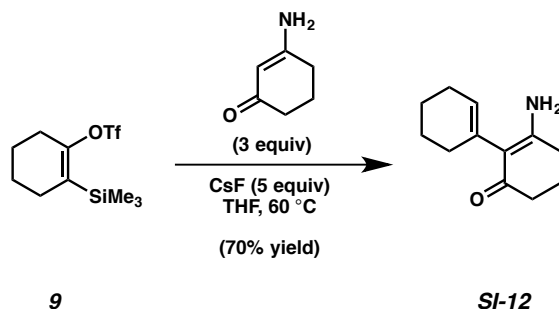

**SI-12.** Purification by preparative thin layer chromatography (1:1 hexanes : EtOAc) afforded adduct **SI-12** as an amorphous white solid (70% yield, average of two experiments).  $R_f$  0.10 (1:1 hexanes : EtOAc);  $^1\text{H}$  NMR (500 MHz,  $\text{CDCl}_3$ ):  $\delta$  5.53–5.50 (m, 1H), 4.80 (br s, 2H), 2.40 (t,  $J = 6.1$ , 2H), 2.31 (t,  $J = 6.1$ , 2H), 2.12–2.07 (m, 2H), 2.07–1.98 (m, 2H), 1.96–1.90 (m, 2H), 1.72–1.66 (m, 2H), 1.65–1.59 (m, 2H);  $^{13}\text{C}$  NMR (125 MHz,  $\text{CDCl}_3$ ):  $\delta$  194.8, 159.4, 133.7, 127.9, 115.3, 37.0, 29.1, 28.3, 25.6, 23.1, 22.3, 21.5; IR (film): 3449, 3303, 3164, 2928, 1529, 1405  $\text{cm}^{-1}$ ; HRMS-ESI ( $m/z$ ) [ $\text{M} + \text{H}$ ] $^+$  calcd for  $\text{C}_{12}\text{H}_{18}\text{ON}$ , 192.1383; found, 192.1376.

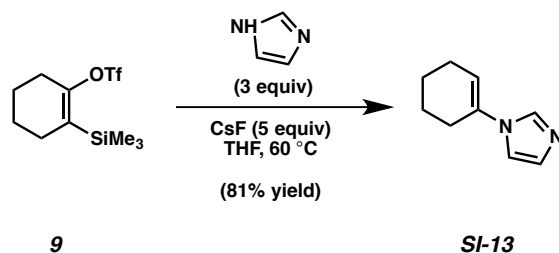

**SI-13.** Purification by preparative thin layer chromatography (1:1 hexanes : EtOAc) afforded adduct **SI-13** as a colorless oil (81% yield, average of two experiments).  $R_f$  0.15 (1:1 hexanes : EtOAc);  $^1\text{H}$  NMR (500 MHz,  $\text{CDCl}_3$ ):  $\delta$  7.64 (s, 1H), 7.06 (d,  $J = 9.8$ , 2H), 5.83–5.79 (m, 1H), 2.44–2.38 (m, 2H), 2.22–2.15 (m, 2H), 1.85–1.78 (m, 2H), 1.69–1.62 (m, 2H);  $^{13}\text{C}$  NMR (125 MHz,  $\text{CDCl}_3$ ):  $\delta$  134.6, 133.9, 129.4, 116.7, 116.5, 27.4, 24.2, 22.5, 21.8; IR (film): 3390, 3115, 2931, 2861, 1673, 1490  $\text{cm}^{-1}$ ; HRMS-ESI ( $m/z$ ) [ $\text{M} + \text{H}$ ] $^+$  calcd for  $\text{C}_9\text{H}_{12}\text{N}_2$ , 149.1073; found, 149.1070.

## B. Synthesis of Cyclopentyne Precursor and Trapping Experiments

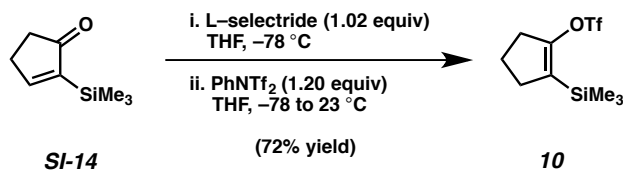

**Silyl triflate 10.** To a solution of known silyl enone **SI-14**<sup>4</sup> (0.963 g, 67.2 mmol, 1 equiv) in THF (22 mL) at  $-78\text{ }^\circ\text{C}$  was added L-selectride (1 M in THF, 6.37 mL, 6.37 mmol, 1.02 equiv) dropwise over 5 min. The reaction was stirred for 3 h, then a solution of  $\text{NPhTf}_2$  (2.68 g, 7.49 mmol, 1.2 equiv) in THF (6.2 mL) was added over 5 min. The reaction was allowed to slowly warm to room temperature and was then stirred for 15 h. The reaction was quenched with saturated aqueous ammonium chloride (20 mL). The layers were separated and the aqueous layer was extracted with EtOAc ( $3 \times 20\text{ mL}$ ). The combined organic layers were washed with brine (50 mL), dried over  $\text{Na}_2\text{SO}_4$ , and concentrated *in vacuo* to provide the crude product, which was purified by flash chromatography (hexanes) to afford silyl triflate **10** (1.30 g, 72% yield) as a colorless oil.  $R_f$  0.52 (hexanes);  $^1\text{H NMR}$  (500 MHz,  $\text{CDCl}_3$ ):  $\delta$  2.65–2.69 (m, 2H), 2.40–2.44 (m, 2H), 1.97–2.03 (m, 2H), 0.16 (s, 9H);  $^{13}\text{C}$  (125 MHz,  $\text{CDCl}_3$ ):  $\delta$  155.0, 130.5, 118.6 (q,  $J = 319.8$ ), 32.6, 32.5, 22.2,  $-1.7$ ;  $^{19}\text{F NMR}$  (376 MHz,  $\text{CDCl}_3$ ):  $\delta$   $-74.3$ , IR (film): 2959, 2902, 2857, 1638, 1418, 1315, 1288, 1250, 1204, 1142, 1122, 1068  $\text{cm}^{-1}$ ; HRMS-ESI ( $m/z$ )  $[\text{M} + \text{H}]^+$  calcd for  $\text{C}_9\text{H}_{16}\text{F}_3\text{O}_3\text{SSi}$ , 289.0536; found, 289.0525.

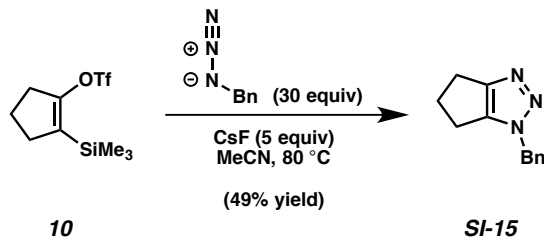

**SI-15 (Table 2, entry 1).** Silyl triflate **10** (65.4 mg, 0.227 mmol, 1 equiv) was added to a flame-dried vial. In a separate flame-dried vial, benzylazide (0.8 M in benzene, 8.5 mL, 6.8 mmol, 30 equiv) was added and the benzene was removed *in vacuo*. The neat benzylazide was then transferred to the vial containing **10** with MeCN (0.91 mL).  $\text{CsF}$  (0.172 g, 1.13 mmol, 5 equiv) was added and the vial was capped and heated to  $80\text{ }^\circ\text{C}$  in a pre-heated aluminum heating block. After heating for 6 d, the reaction

was cooled to room temperature and filtered through a small plug of silica gel (EtOAc eluent, 10 mL). The solvent was removed *in vacuo* and the crude material was purified by flash chromatography (3:1→1:1 hexanes : EtOAc) to provide triazole **SI-15** (49% yield, average of two experiments) as a white solid.  $R_f$  0.39 (1:1 hexanes : EtOAc); Mp: 7.4–73.2 °C;  $^1\text{H}$  NMR (500 MHz,  $\text{CDCl}_3$ ):  $\delta$  7.33–7.37 (m, 3H), 7.24–7.26 (m, 2H), 5.41 (s, 2H), 2.72–2.74 (m, 2H), 2.51–2.57 (m, 2H), 2.38–2.41 (m, 2H);  $^{13}\text{C}$  (125 MHz,  $\text{CDCl}_3$ ):  $\delta$  156.8, 142.1, 134.7, 129.1, 128.7, 128.3, 53.3, 30.4, 22.7, 21.8; IR (film): 3063, 3032, 2978, 2955, 2937, 2921, 2866, 1572, 1495, 1452, 1373, 1275, 1230, 1176, 1084, 1059  $\text{cm}^{-1}$ ; HRMS-ESI ( $m/z$ ) [ $\text{M} + \text{H}$ ] $^+$  calcd for  $\text{C}_{12}\text{H}_{14}\text{N}_3$ , 200.1182; found, 200.1174.

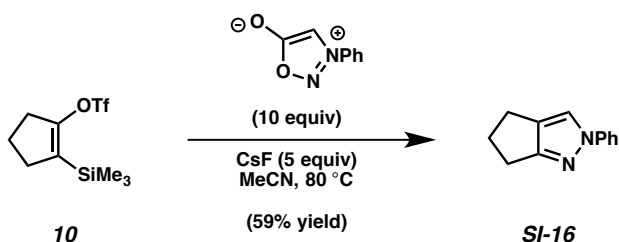

**SI-16 (Table 2, entry 2).** To a solution of silyl triflate **10** (50.4 mg, 0.175 mmol, 1 equiv) in MeCN (1.4 mL) in a flame-dried vial was added the sydnone (0.283 g, 1.75 mmol, 10 equiv), and CsF (0.133 g, 0.874 mmol, 5 equiv). The vial was capped and heated to 80 °C in a pre-heated aluminum block. After stirring for 17 h, the reaction was cooled to room temperature and filtered through a small plug of silica gel (EtOAc eluent, 10 mL). The solvent was removed *in vacuo* and the crude material was purified by flash chromatography (39:1→19:1 hexanes : EtOAc) to afford pyrazole **SI-16** (59% yield, average of two experiments) as a white solid.  $R_f$  0.36 (9:1 hexanes : EtOAc); Mp: 74.9–75.6 °C;  $^1\text{H}$  NMR (500 MHz,  $\text{CDCl}_3$ ):  $\delta$  7.61–7.63 (m, 2H), 7.53 (s, 1H), 7.38–7.42 (m, 2H), 7.19–7.26 (m, 1H), 2.79–2.82 (m, 2H), 2.70–2.73 (m, 2H), 2.42–2.47 (m, 2H);  $^{13}\text{C}$  (125 MHz,  $\text{CDCl}_3$ ):  $\delta$  164.0, 141.1, 129.5, 127.4, 125.6, 120.6, 118.7, 30.1, 24.7, 23.2; IR (film): 3109, 3051, 2962, 2947, 2866, 2853, 1598, 1577, 1504, 1460, 1440, 1376, 1212, 1036  $\text{cm}^{-1}$ ; HRMS-ESI ( $m/z$ ) [ $\text{M} + \text{H}$ ] $^+$  calcd for  $\text{C}_{12}\text{H}_{13}\text{N}_2$ , 185.1073; found, 185.1065.

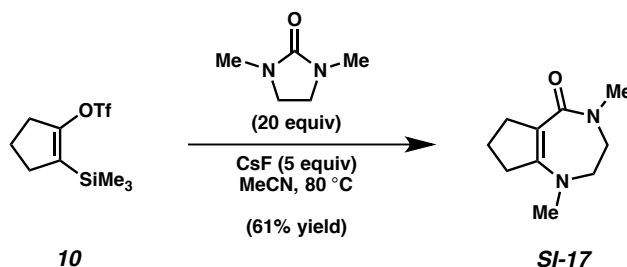

**SI-17 (Table 2, entry 3).** To a solution of silyl triflate **10** (44.8 mg, 0.155 mmol, 1 equiv) in MeCN (0.62 mL) in a flame-dried vial was added DMI (0.34 mL, 3.11 mmol, 20 equiv) and CsF (0.118 g, 0.777 mmol, 5 equiv). The vial was capped and heated to 80 °C in a pre-heated aluminum block. After stirring for 23 h, the reaction was cooled to room temperature and filtered through a small plug of silica gel (EtOAc eluent, 10 mL). The solvent was removed *in vacuo* and the crude product was purified by flash chromatography (EtOAc→49:1→19:1 CH<sub>2</sub>Cl<sub>2</sub> : MeOH) to afford vinylogous urea **SI-17** (61% yield, average over two experiments) as a colorless oil. *R<sub>f</sub>* 0.34 (9:1 CH<sub>2</sub>Cl<sub>2</sub> : MeOH); <sup>1</sup>H NMR (500 MHz, CDCl<sub>3</sub>): δ 3.45–3.46 (m, 2H), 3.31–3.33 (m, 2H), 2.98 (s, 3H), 2.89 (s, 3H), 2.73 (t, *J* = 7.3, 2H), 2.60 (t, *J* = 7.6, 2H), 1.75 (p, *J* = 7.5, 2H); <sup>13</sup>C (125 MHz, CDCl<sub>3</sub>): δ 168.9, 152.1, 101.4, 55.6, 49.2, 41.1, 36.6, 36.4, 34.5, 20.6; IR (film): 2938, 2845, 1587, 1574, 1560 1490, 1431, 1404, 1305, 1204, 1090 cm<sup>-1</sup>; HRMS-ESI (*m/z*) [*M* + H]<sup>+</sup> calcd for C<sub>10</sub>H<sub>17</sub>N<sub>2</sub>O, 181.1335; found, 181.1327.

## C. Synthesis of 3-Benzyloxy-Cyclohexyne Precursor.

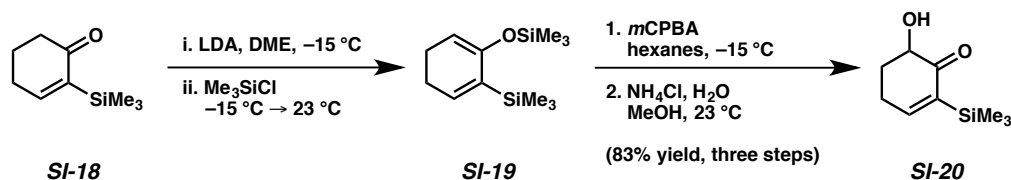

**$\alpha$ -Hydroxy-silylenone SI-20.** To a solution of *i*Pr<sub>2</sub>NH (0.5 mL, 3.57 mmol, 1.2 equiv) in DME (7.4 mL) at  $-15^\circ\text{C}$  was added *n*-BuLi (2.52 M in hexanes, 1.3 mL, 3.27 mmol, 1.1 equiv). The reaction was stirred for 20 min, then known ketone **SI-18**<sup>4</sup> (0.500 g, 2.97 mmol, 1 equiv) in DME (3.5 mL) was added. After stirring for 30 min at  $-15^\circ\text{C}$ , TMSCl (0.75 mL, 5.94 mmol, 2 equiv) was added and the mixture was allowed to warm to room temperature. After stirring for 2 h, the solvent was removed *in vacuo*. The residue was suspended in pentane (15 mL), filtered and concentrated *in vacuo* to give silyl enol ether **SI-19**, which was used in the next step without further purification.

Silyl enol ether **SI-19** was dissolved in hexanes (5 mL) and added to a mixture of *m*CPBA (77%, 0.732 g, 4.24 mmol, 1.1 equiv) in hexanes (42 mL) at  $-15^\circ\text{C}$ . The reaction was allowed to warm to room temperature, stirred for 2 h, and then filtered and concentrated *in vacuo*. The residue was dissolved in MeOH (5 mL) and saturated aqueous ammonium chloride (5 mL) was added. After stirring for 25 min, saturated aqueous sodium bicarbonate (20 mL) was added. The layers were separated and the aqueous layer was extracted with EtOAc (3  $\times$  20 mL). The combined organic layers were washed with brine (40 mL), dried over Na<sub>2</sub>SO<sub>4</sub> and concentrated *in vacuo* to give a crude oil. Purification by flash chromatography (9:1 hexanes : EtOAc) provided  $\alpha$ -hydroxy-silylenone **SI-20** (0.457 g, 83% yield) as a yellow oil. *R*<sub>f</sub> 0.27 (9:1 hexanes : EtOAc); <sup>1</sup>H NMR (500 MHz, CDCl<sub>3</sub>):  $\delta$  7.06–7.08 (m, 1H), 4.09 (dd, *J* = 13.8, 5.7, 1H), 3.82 (bs, 1H), 2.47 (m, 2H), 2.28–2.33 (m, 1H), 1.72–1.81 (m, 1H), 0.09 (s, 9H); <sup>13</sup>C (125 MHz, CDCl<sub>3</sub>):  $\delta$  203.2, 159.1, 139.1, 72.5, 31.3, 27.5,  $-1.5$ ; IR (film): 3483, 2954, 2899, 2870, 2824, 1664, 1591, 1457, 1423, 1332, 1246, 1167, 1144, 1113, 1076 cm<sup>-1</sup>; HRMS-ESI (*m/z*) [*M* + *H*]<sup>+</sup> calcd for C<sub>9</sub>H<sub>17</sub>O<sub>2</sub>Si, 185.0992; found, 185.0989.

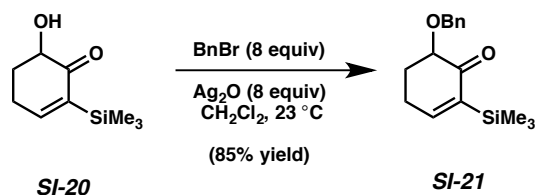

**Benzyloxy-silylenone SI-21.**  $\alpha$ -Hydroxy-silylenone **SI-20** (1.00 g, 5.43 mmol, 1 equiv) was dissolved in  $\text{CH}_2\text{Cl}_2$  (22 mL) and BnBr (5.2 mL, 43.41 mmol, 8 equiv) and  $\text{Ag}_2\text{O}$  (10.06 g, 43.41 mmol, 8 equiv) were added. After stirring for 14 h at room temperature, the reaction was filtered through celite ( $\text{CH}_2\text{Cl}_2$  eluent, 30 mL) and concentrated *in vacuo*. The crude product was purified by flash chromatography (benzene  $\rightarrow$  99:1  $\rightarrow$  49:1 benzene : EtOAc) to give benzyloxy-silylenone **SI-21** (1.269 g, 85% yield) as a white solid. Mp: 56.5–59.5  $^\circ\text{C}$ ;  $R_f$  0.60 (9:1 hexanes : EtOAc);  $^1\text{H}$  NMR (500 MHz,  $\text{CDCl}_3$ ):  $\delta$  7.38 (app. dd,  $J = 7.3, 1.4, 2\text{H}$ ), 7.34 (app dt,  $J = 7.3, 1.8, 2\text{H}$ ), 7.28 (app. tt,  $J = 6.5, 2.1, 1\text{H}$ ), 7.06 (ddd,  $J = 3.9, 3.0, 0.6, 1\text{H}$ ), 4.87 (d,  $J = 11.9, 1\text{H}$ ), 4.60 (d,  $J = 11.9, 1\text{H}$ ), 3.89 (dd,  $J = 11.0, 4.6, 1\text{H}$ ), 2.57 (dq,  $J = 19.4, 4.4, 1\text{H}$ ), 2.46–2.36 (m, 1H), 2.21 (dq,  $J = 13.2, 4.4, 1\text{H}$ ), 2.14–2.03 (m, 1H), 0.17 (s, 9H);  $^{13}\text{C}$  NMR (125 MHz,  $\text{CDCl}_3$ ):  $\delta$  201.5, 157.3, 140.8, 138.4, 128.4, 127.9, 127.7, 78.7, 72.1, 29.6, 26.9, -1.3; IR (film): 3031, 2953, 1749, 1673, 1593, 1338  $\text{cm}^{-1}$ ; HRMS-ESI ( $m/z$ )  $[\text{M} + \text{H}]^+$  calcd for  $\text{C}_{16}\text{H}_{23}\text{O}_2\text{Si}$ , 275.1462; found, 275.1453.

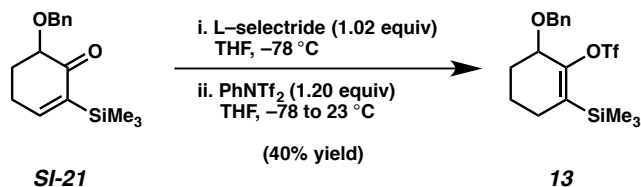

**Benzyloxy-silyltriflate 13.** To a solution of benzyloxy-silylenone **SI-21** (0.148 mg, 0.541 mmol, 1 equiv) in THF (2.2 mL) at  $-78\text{ }^\circ\text{C}$  was added L-selectride (1 M in THF, 552  $\mu\text{L}$ , 0.552 mmol, 1.02 equiv) dropwise over 5 min. The reaction was stirred for 3 h at  $-78\text{ }^\circ\text{C}$ , then a solution of  $\text{NPhTf}_2$  (233 mg, 0.649 mmol, 1.20 equiv) in THF (0.5 mL) was added dropwise over 5 min. The reaction was allowed to slowly warm to  $23\text{ }^\circ\text{C}$  and was stirred for an additional 15 h. The reaction was then quenched with saturated  $\text{NH}_4\text{Cl}$  (4 mL). The layers were separated and the aqueous layer was extracted with EtOAc ( $3 \times 4\text{ mL}$ ). The combined organic layers were washed with brine (5 mL), dried over  $\text{Na}_2\text{SO}_4$  and concentrated *in vacuo*. Further purification by column chromatography with basic Brockman Grade I 58

Å Al<sub>2</sub>O<sub>3</sub> (Activity 1) as the stationary (hexanes) afforded benzyloxy-silyltriflate **13** (88.6 mg, 40% yield) as a colorless oil. R<sub>f</sub> 0.80 (9:1 hexanes : EtOAc); <sup>1</sup>H NMR (500 MHz, C<sub>6</sub>D<sub>6</sub>): δ 7.34 (d, *J* = 7.6, 2H), 7.19–7.12 (m, 2H), 7.08 (t, *J* = 7.6, 1H), 4.32 (dd, *J* = 46.3, 10.9, 2H), 4.16 (app. t, *J* = 4.2, 1H), 1.91 (dt, *J* = 17.9, 4.2, 1H), 1.77–1.61 (m, 2H), 1.53–1.41 (m, 1H), 1.30 (app. tt, *J* = 12.3, 3.3, 1H), 1.16–1.04 (m, 1H), 0.15 (s, 9H); <sup>13</sup>C (125 MHz, CD<sub>2</sub>Cl<sub>2</sub>): δ 152.9, 138.7, 134.1, 128.6, 128.3, 128.0, 118.8 (q, *J* = 332.0), 73.4, 70.9, 29.3, 28.2, 17.9, -1.3 ; IR (film): 3210, 3035, 2950, 2868, 1643, 1401 cm<sup>-1</sup>; HRMS-ESI (*m/z*) [M + H]<sup>+</sup> calcd for C<sub>17</sub>H<sub>24</sub>O<sub>4</sub>SSiF<sub>3</sub>, 409.1111; found, 409.1094.

## D. 3-Benzyloxy-Cyclohexyne Trapping Experiments.

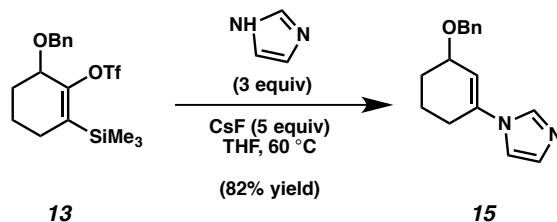

**Imidazolyl-cyclohexene 15 (Figure 3).** To a solution of silyl triflate **13** (51.6 mg, 0.126 mmol, 1 equiv) in THF (5.1 mL) in a flame-dried vial was added imidazole (25.8 mg, 0.379 mmol, 3 equiv) and CsF (95.9 mg, 0.632 mmol, 5 equiv). The vial was capped and heated to 60 °C in a pre-heated aluminum block. After stirring for 17.5 h, the reaction was cooled to room temperature and filtered through a small plug of silica gel (EtOAc eluent, 10 mL). The solvent was removed *in vacuo* and the crude product was purified by flash chromatography (3:1 EtOAc : hexanes) to afford imidazolyl-cyclohexene **15** as a colorless oil (82% yield, average of two experiments).  $R_f$  0.50 (EtOAc);  $^1\text{H}$  NMR (500 MHz,  $\text{CDCl}_3$ ):  $\delta$  7.70 (s, 1H), 7.36–7.27 (m, 5H), 7.12 (s, 1H), 7.07 (s, 1H), 5.92 (m, 1H), 4.65 (d,  $J = 11.8$ , 1H), 4.57 (d,  $J = 11.8$ , 1H), 4.18–4.15 (m, 1H), 2.53–2.48 (m, 1H), 2.44–2.38 (m, 1H), 2.06–2.01 (m, 1H), 1.88–1.74 (m, 3H);  $^{13}\text{C}$  NMR (125 MHz,  $\text{CDCl}_3$ ):  $\delta$  138.6, 136.9, 134.6, 129.8, 128.6, 127.8, 127.8, 116.5, 115.7, 71.7, 70.7, 27.7, 27.3, 18.6; IR (film): 3396, 3117, 2942, 2866, 1669, 1491, 1454, 1392, 1292, 1246, 1073  $\text{cm}^{-1}$ ; HRMS-ESI ( $m/z$ )  $[\text{M} + \text{H}]^+$  calcd for  $\text{C}_{16}\text{H}_{19}\text{N}_2\text{O}$ , 255.1492; found, 255.1483.

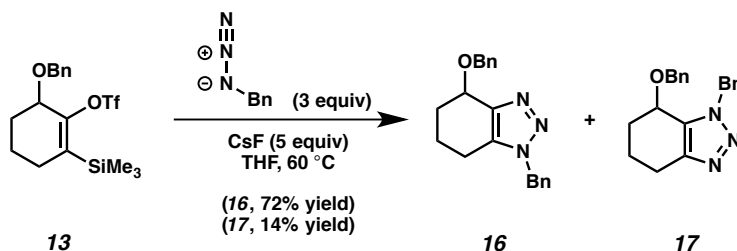

**Triazoles 16 and 17 (Figure 3).** Silyl triflate **13** (50.7 mg, 0.124 mmol, 1 equiv) was added to a flame-dried vial. In a separate flame-dried vial benzylazide (0.8 M in benzene, 0.47 mL, 0.37 mmol, 3 equiv) was added and the benzene was removed *in vacuo*. The neat benzylazide was then transferred to the vial containing **13** with THF (5.0 mL). CsF (0.094 g, 0.62 mmol, 5 equiv) was added and the vial was capped and heated to 60 °C in a pre-heated aluminum heating block. After 21 h, the reaction was cooled



to room temperature and filtered through a small plug of silica gel (EtOAc eluent, 10 mL). The solvent was removed *in vacuo* and the crude product was purified by flash chromatography (5:3:2 hexanes : EtOAc : benzene) to provide triazole **16** (72% yield, average over two experiments) as a colorless oil and triazole **17** (14% yield, average over two experiments) as a colorless oil. Triazole **16**:  $R_f$  0.47 (5:3:2 hexanes : EtOAc : benzene);  $^1\text{H}$  NMR (500 MHz,  $\text{CDCl}_3$ ):  $\delta$  7.19–7.42 (m, 10H), 5.49 (d,  $J = 15.4$ , 1H), 5.40 (d,  $J = 15.4$ , 1H), 4.88 (d,  $J = 12.0$ , 1H), 4.80 (d,  $J = 12.0$ , 1H), 4.70 (t,  $J = 3.6$ , 1H), 2.55 (ddd,  $J = 16.5$ , 5.8, 3.0, 1H), 2.29 (ddd,  $J = 16.5$ , 10.5, 6.0, 1H), 2.11–2.16 (m, 1H), 1.99–2.08 (m, 1H), 1.77–1.83 (m, 1H), 1.65–1.71 (m, 1H);  $^{13}\text{C}$  (125 MHz,  $\text{CDCl}_3$ ):  $\delta$  144.2, 138.8, 134.7, 133.9, 129.1, 128.4, 128.4, 127.9, 127.7, 127.5, 10.7, 67.9, 52.0, 29.4, 20.2, 18.1; IR (film): 3063, 3031, 2946, 2866, 1605, 1586, 1497, 1455, 1436, 1314, 1237, 1208, 1116, 1089, 1070, 1047, 1028  $\text{cm}^{-1}$ ; HRMS-ESI ( $m/z$ )  $[\text{M} + \text{H}]^+$  calcd for  $\text{C}_{20}\text{H}_{22}\text{N}_3\text{O}$ , 320.1757; found, 320.1744. Triazole **17**:  $R_f$  0.35 (5:3:2 hexanes : EtOAc : benzene);  $^1\text{H}$  NMR (500 MHz,  $\text{CDCl}_3$ ):  $\delta$  7.39–7.27 (m, 8H), 7.04–7.03 (m, 2H), 5.64 (d,  $J = 15.1$ , 1H), 5.31 (d, 15.1, 1H), 4.65 (d,  $J = 11.3$ , 1H), 4.40 (t,  $J = 4.7$ , 1H), 4.39 (d,  $J = 11.3$ , 1H), 2.84 (dt,  $J = 16.0$ , 5.5, 1H), 2.69 (ddd,  $J = 16.0$ , 8.3, 5.6, 1H), 2.09–2.03 (m, 1H), 2.01–1.93 (m, 1H), 1.88–1.82 (m, 1H), 1.80–1.74 (m, 1H);  $^{13}\text{C}$  (125 MHz,  $\text{CDCl}_3$ ):  $\delta$  145.8, 137.8, 135.3, 131.6, 128.9, 128.8, 128.2, 128.2, 128.1, 127.6, 70.4, 67.9, 52.4, 27.9, 22.1, 19.5; IR (film): 3064, 3031, 2943, 2861, 1587, 1497, 1455, 1358, 1311, 1198, 1159, 1072  $\text{cm}^{-1}$ ; HRMS-ESI ( $m/z$ )  $[\text{M} + \text{H}]^+$  calcd for  $\text{C}_{20}\text{H}_{22}\text{N}_3\text{O}$ , 320.1757; found, 320.1745.

## E. Derivatization of Triazole 16.

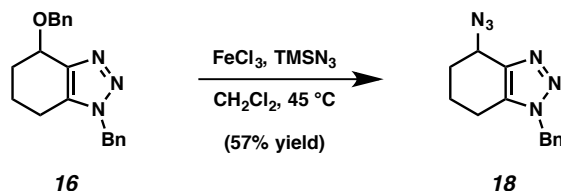

**Azide 18 (Scheme 1).** Triazole **16** (24.6 mg, 0.077 mmol, 1 equiv) in  $\text{CH}_2\text{Cl}_2$  (0.39 mL) was added to a vial containing  $\text{FeCl}_3$  (18.7 mg, 0.116 mmol, 1.5 equiv).  $\text{TMSN}_3$  (61  $\mu\text{L}$ , 0.462 mmol, 6 equiv) was then added and the vial was capped and heated to 45  $^\circ\text{C}$ . After stirring for 18 h, the vial was cooled to room temperature and water (1 mL) was added. The layers were separated and the aqueous layer was extracted with  $\text{CH}_2\text{Cl}_2$  (3  $\times$  1 mL). The combined organic layers were washed with brine (3 mL), dried over  $\text{Na}_2\text{SO}_4$ , filtered, and concentrated *in vacuo*. The crude product was purified by preparative thin layer chromatography (5:3:2 hexanes : EtOAc : PhH) to provide azide **18** (11.2 mg, 57% yield) as a white solid.  $R_f$  0.40 (5:3:2 hexanes : EtOAc : PhH); Mp: 53.4–55.1  $^\circ\text{C}$ ;  $^1\text{H}$  NMR (500 MHz,  $\text{CDCl}_3$ ):  $\delta$  7.37–7.31 (m, 3H), 7.21–7.19 (m, 2H), 5.52 (d,  $J = 15.4$ , 1H), 5.43 (d,  $J = 15.4$ , 1H), 4.83 (t,  $J = 4.1$ , 1H), 2.56–2.51 (m, 1H), 2.35–2.29 (m, 1H), 1.98–1.80 (m, 4H);  $^{13}\text{C}$  (125 MHz,  $\text{CDCl}_3$ ):  $\delta$  142.1, 134.5, 133.9, 129.2, 128.7, 127.7, 53.0, 52.3, 29.2, 20.0, 18.6; IR (film): 3064, 3033, 2949, 2866, 2096, 1587, 1497, 1456, 1436, 1240, 1091, 1071  $\text{cm}^{-1}$ ; HRMS-ESI ( $m/z$ )  $[\text{M} + \text{H}]^+$  calcd for  $\text{C}_{13}\text{H}_{15}\text{N}_6$ , 255.1353; found, 255.1347.

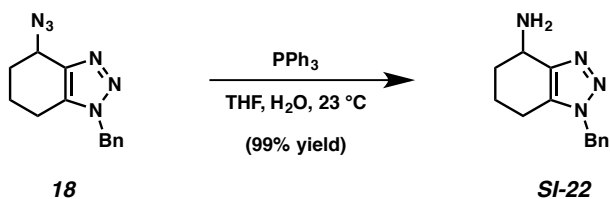

**Amine SI-22 (Scheme 1).** Water (21  $\mu\text{L}$ , 1.18 mmol, 10 equiv) was added to a mixture of azide **18** (30 mg, 0.118 mmol, 1 equiv) and  $\text{PPh}_3$  (93 mg, 0.354 mmol, 3 equiv) in THF (1.2 mL) at room temperature. After stirring for 18 h, the reaction was concentrated *in vacuo*. The crude material was purified by flash chromatography (EtOAc  $\rightarrow$  9:1  $\text{CH}_2\text{Cl}_2$  : MeOH) to afford amine **SI-22** (26.5 mg, 99% yield) as a colorless oil.  $R_f$  0.21 (9:1  $\text{CH}_2\text{Cl}_2$  : MeOH); Mp: 89.6–91.6  $^\circ\text{C}$ ;  $^1\text{H}$  NMR (500 MHz,  $\text{CDCl}_3$ ):

$\delta$  7.35–7.30 (m, 3H), 7.19–7.18 (m, 2H), 2.43 (s, 2H), 4.19 (t,  $J = 5.6$ , 1H), 2.50 (bs, 2H), 2.46–2.35 (m, 2H), 2.06–1.95 (m, 2H), 1.76–1.69 (m, 1H), 1.60–1.54 (m, 1H);  $^{13}\text{C}$  (125 MHz,  $\text{CDCl}_3$ ):  $\delta$  147.3, 134.8, 132.4, 129.1, 128.5, 127.7, 52.1, 44.6, 32.1, 20.2, 19.9; IR (film): 3361, 3063, 3032, 2932, 2860, 1586, 1497, 1456, 1303, 1242, 1204, 1098, 1074  $\text{cm}^{-1}$ ; HRMS-ESI ( $m/z$ )  $[\text{M} + \text{H}]^+$  calcd for  $\text{C}_{13}\text{H}_{17}\text{N}_4$ , 229.1448; found, 229.1449.

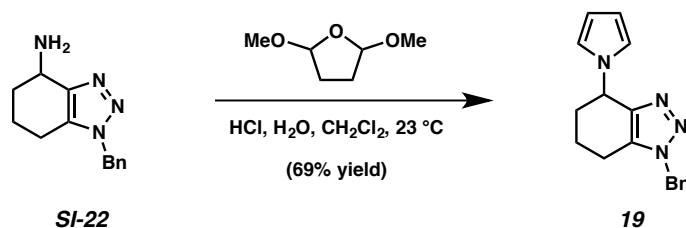

**Triazolopyrrole 19 (Scheme 1).** To a vial containing HCl (0.1 M in  $\text{H}_2\text{O}$ , 0.22 mL) was added 2,5-dimethoxytetrahydrofuran (28.4  $\mu\text{L}$ , 0.219 mmol, 4 equiv) and the mixture was heated to 100  $^\circ\text{C}$ . After 30 min, the vial was cooled to room temperature and the mixture was added to a solution of amine **SI-22** (11.8 mg, 0.055 mmol, 1 equiv) in  $\text{CH}_2\text{Cl}_2$  (0.55 mL). The reaction was stirred at room temperature for 15 h, then aqueous sodium hydroxide (1 M in  $\text{H}_2\text{O}$ , 1 mL) was added. The solution was extracted with  $\text{CH}_2\text{Cl}_2$  ( $3 \times 1$  mL). The combined organic layers were washed with brine (2 mL), dried over  $\text{Na}_2\text{SO}_4$ , filtered and concentrated *in vacuo*. The crude product was purified by flash chromatography (3:2 hexanes : EtOAc) to provide triazolopyrrole **19** (10.5 mg, 69% yield) as a white solid.  $R_f$  0.46 (1:1 hexanes : EtOAc); Mp: 168.4–170.6  $^\circ\text{C}$ ;  $^1\text{H}$  NMR (500 MHz,  $\text{CDCl}_3$ ):  $\delta$  7.37–7.34 (m, 3H), 7.23–7.21 (m, 2H), 6.61 (t,  $J = 2.2$ , 2H), 6.14 (t,  $J = 2.2$ , 2H), 5.53 (d,  $J = 15.3$ , 1H), 5.47 (d,  $J = 15.3$ , 1H), 5.41 (t,  $J = 4.8$ , 1H), 2.57 (dt,  $J = 16.5$ , 5.2, 1H), 2.40 (dt,  $J = 16.5$ , 7.5, 1H), 2.18–2.13 (m, 1H), 2.10–2.03 (m, 1H), 1.85–1.80 (m, 2H);  $^{13}\text{C}$  (125 MHz,  $\text{CDCl}_3$ ):  $\delta$  142.3, 134.6, 134.3, 129.2, 128.7, 127.7, 119.8, 108.2, 52.3, 51.3, 31.8, 20.0, 19.0; IR (film): 3096, 3064, 3033, 2930, 2864, 1587, 1488, 1455, 1434, 1277, 1247, 1089, 1072  $\text{cm}^{-1}$ ; HRMS-ESI ( $m/z$ )  $[\text{M} + \text{H}]^+$  calcd for  $\text{C}_{17}\text{H}_{19}\text{N}_4$ , 279.1604; found, 279.1599.

**Computational Methods.** All calculations were carried out with the meta-hybrid M06-2X<sup>5</sup> functional and 6-311+G(2d,p) basis set. Full geometry optimizations and transition structure (TS) searches were carried out with the Gaussian 09 package.<sup>6</sup> Thermal and entropic corrections to energy were calculated from vibrational frequencies. The nature of the stationary points was determined in each case according to the appropriate number of negative eigenvalues of the Hessian matrix from the frequency calculations. Scaled frequencies were not considered. Mass-weighted intrinsic reaction coordinate (IRC) calculations were carried out using the Gonzalez and Schlegel scheme<sup>7</sup> in order to ensure that the TSs indeed connected the appropriate reactants and products. Bulk solvent effects were considered implicitly during optimization through the IEF-PCM polarizable continuum model<sup>8</sup> as implemented in Gaussian 09. The parameters for tetrahydrofuran were used to calculate solvation free energies ( $\Delta G_{\text{solv}}$ ). The possibility of different conformations was taken into account for all structures. Gibbs free energies ( $\Delta G$ ) were used for the discussion on the relative stabilities of the considered structures. Cartesian coordinates, electronic energies, entropies, enthalpies, Gibbs free energies, and lowest frequencies of the different conformations of all structures are provided.

**F. Bent's Rule and Alkyne Distortion Determine Regioselectivity of Nucleophilic Addition.** Henry Bent stated in 1961 that “*atomic s character concentrates in orbitals directed toward electropositive substituents*”. The rationale for this rule is that bonds between elements of different electronegativities are polarized in a way that the electron density will be shifted towards the more electronegative element. Due to the inherent higher stability of *s* orbitals, the hybrid orbitals from the more electronegative atoms will increase their *s* character in order to stabilize the withdrawn electron density. To compensate for this shift in electron density, the less electronegative atoms will direct hybrid orbitals with an increased *p* character toward the more electronegative atoms to which they are bound, without a significant energy penalty. As a result, the hybrid orbitals that constitute these polarized bonds deviate from ideal  $sp^n$  ( $n = 1, 2$  or  $3$ ) hybridizations, which translates into distorted geometries.

In restrained alkynes bearing an electron-withdrawing substituent, such as 3-methoxycyclohexyne, the C2–C3 is polarized as revealed by the increment in the atomic charge ( $\Delta q$ ) at C2 with respect to cyclohexyne (Figure SI-1a); following Bent's rule, the  $\sigma$ -bonding orbitals ( $sp$ ) at C2 possess more *p* character, which translates into a more compressed internal angle ( $124^\circ$ ) with respect to cyclohexyne ( $132^\circ$ ). In turn, the  $sp$   $\sigma$ -bonding orbitals of C1 rehybridize to increase their *s* character, which causes the internal angle to be more linear ( $138^\circ$ ) with respect to cyclohexyne ( $132^\circ$ ). This change in geometry is associated with a very slight polarization of the C1–C2 bond and an increase of the *p* character of the reacting orbital and a slightly greater contribution of C1 to the LUMO, but, more importantly, involves a pre-distortion of the reactant towards the geometry that is required to achieve the transition state for nucleophilic addition. For the *distal* attack, only minimal geometric and electronic changes are required to reach the saddle point in the potential energy surface, resulting in a generally early transition state and low activation barrier (Figures SI-1b and 4 in the manuscript). Conversely, attack at the *proximal* position, besides minor electrostatic and steric repulsions, requires a complete redistribution of the electron density and modification of the geometry (*i.e.* distortion) to reallocate the developing negative charge in the C1; this reaction pathway is thus associated to a normally late transition state and a high activation barrier (Figures SI-1b and 4 in the manuscript). Another benefit for regioselectivity is the stabilization of the negative charge of the developing anion at C2, whose non-bonding orbital has an increased *s* character, upon nucleophilic attack at C1.

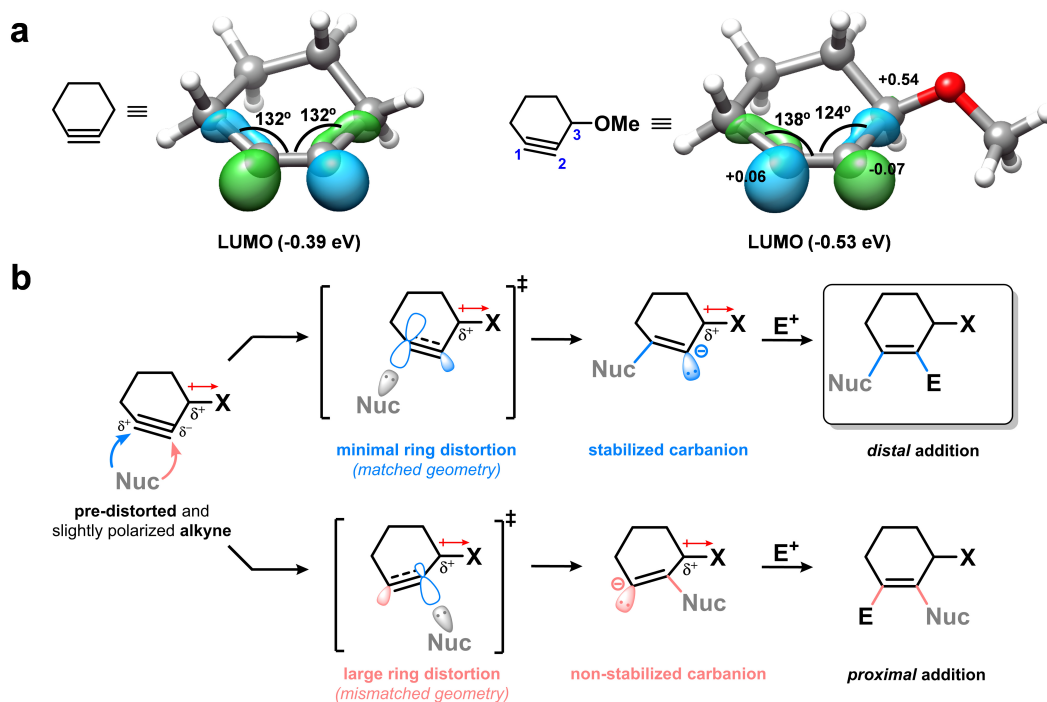

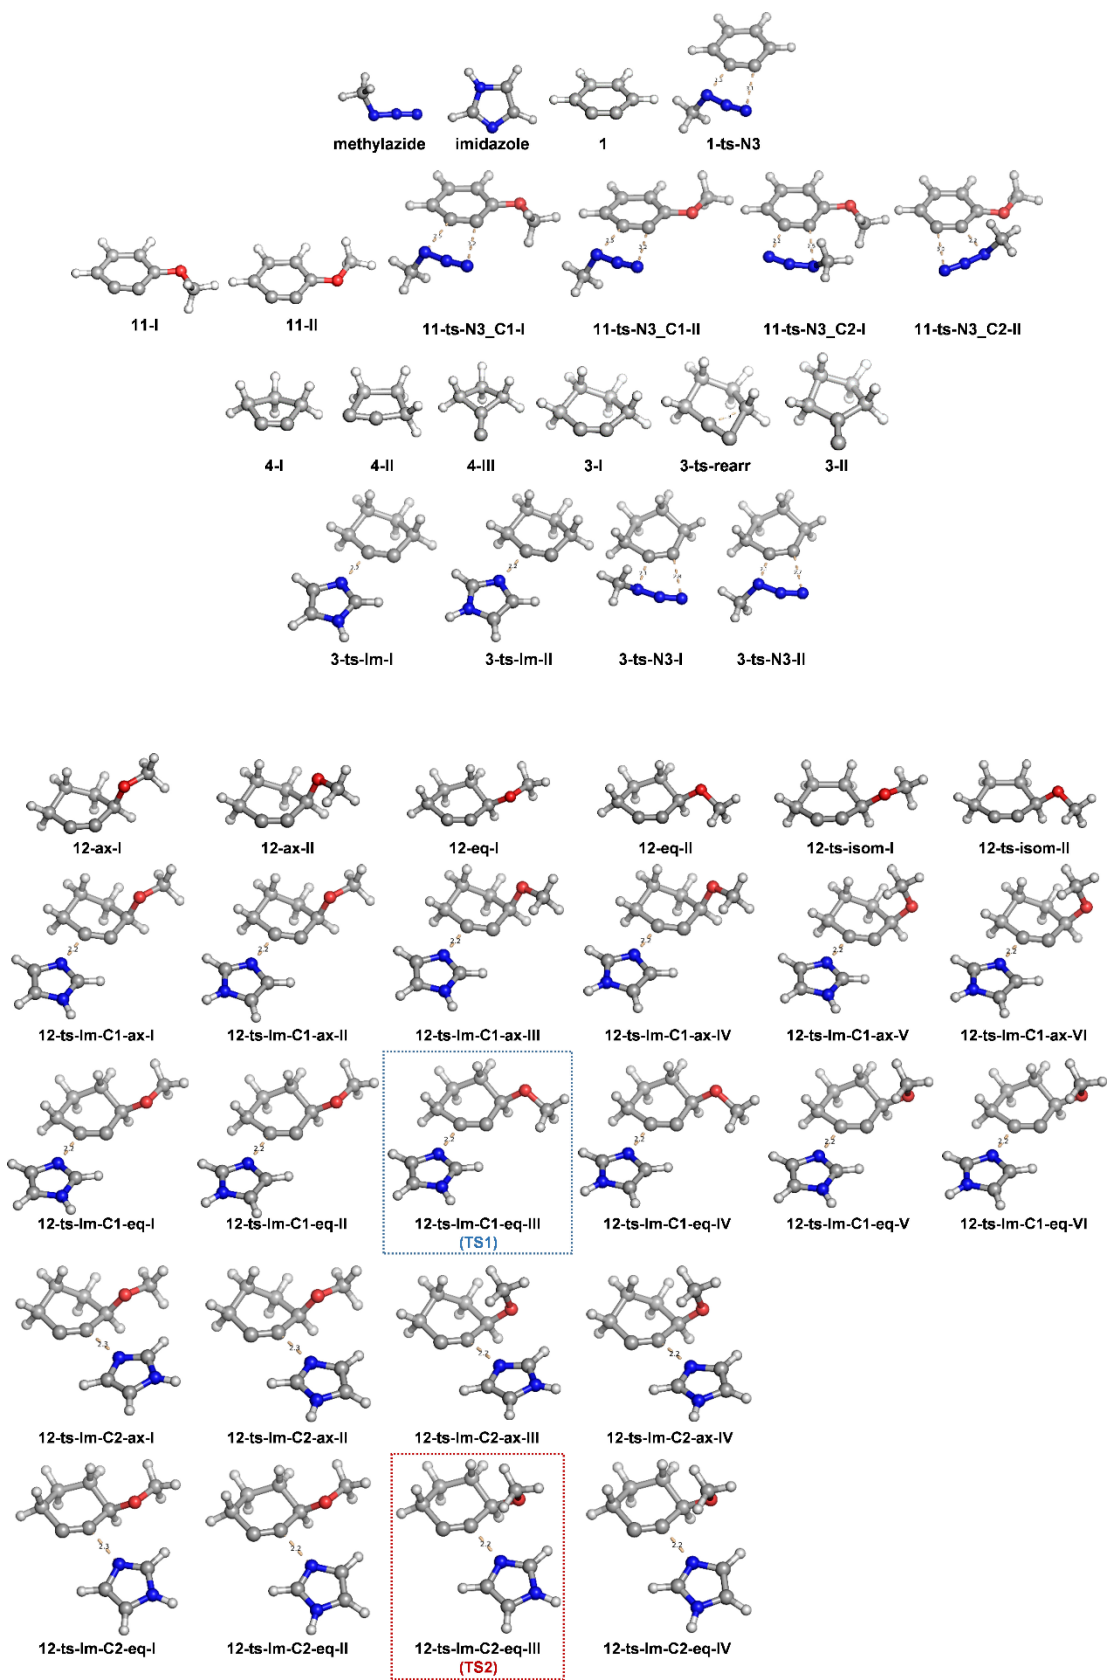

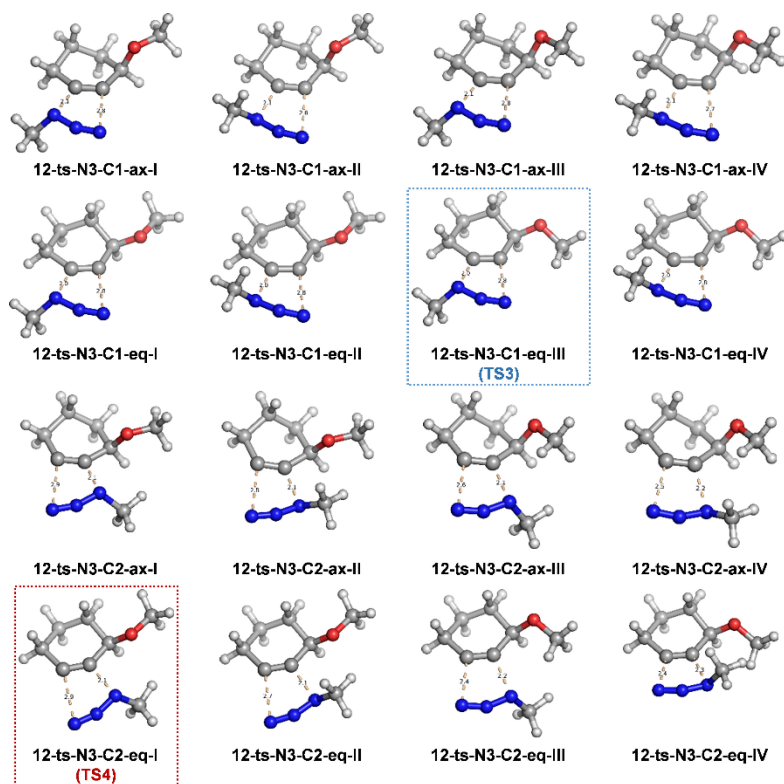

**Figure SI-2. Geometries calculated at the PCM(THF)/M06-2X/6-311+G(2d,p) level.** The minimum energy transition states for 3-methoxycyclohexyne are labeled as TS1-TS4 as shown in Figure 4 of the manuscript.



**G. Table SI-1. Energies, enthalpies, free energies, and entropies of the structures calculated at the PCM(THF)/M06-2X/6-311+G(2d,p) level.**

| Structure                 | $E_0$                  | $E_0+ZPE$              | $H$                    | $S$                                                   | $G$                    | Lowest freq.        |
|---------------------------|------------------------|------------------------|------------------------|-------------------------------------------------------|------------------------|---------------------|
|                           | (Hartree) <sup>a</sup> | (Hartree) <sup>a</sup> | (Hartree) <sup>a</sup> | (cal mol <sup>-1</sup> K <sup>-1</sup> ) <sup>b</sup> | (Hartree) <sup>a</sup> | (cm <sup>-1</sup> ) |
| methylazide               | -204.069524            | -204.018649            | -204.013286            | 67.2                                                  | -204.045233            | 105.8               |
| imidazole                 | -226.202555            | -226.130419            | -226.125799            | 64.9                                                  | -226.156640            | 573.7               |
| <b>1</b>                  | -230.878167            | -230.802434            | -230.797046            | 68.9                                                  | -230.829767            | 393.9               |
| <b>1-ts-N3</b>            | -434.950394            | -434.822419            | -434.811989            | 97.9                                                  | -434.858514            | -116.3              |
| <b>11-I</b>               | -345.400552            | -345.291894            | -345.283997            | 82.2                                                  | -345.323071            | 88.1                |
| <b>11-II</b>              | -345.397789            | -345.288702            | -345.280992            | 81.1                                                  | -345.319529            | 100.3               |
| <b>11-ts-N3_C1-I</b>      | -549.475642            | -549.315051            | -549.301834            | 113.2                                                 | -549.355610            | -22.2               |
| <b>11-ts-N3_C1-II</b>     | -549.472332            | -549.311289            | -549.298277            | 112.0                                                 | -549.351475            | -65.0               |
| <b>11-ts-N3_C2-I</b>      | -549.468182            | -549.306996            | -549.294232            | 109.0                                                 | -549.346033            | -258.2              |
| <b>11-ts-N3_C2-II</b>     | -549.468606            | -549.307182            | -549.294315            | 110.1                                                 | -549.346617            | -127.0              |
| <b>4-II</b>               | -193.938760            | -193.847196            | -193.840924            | 74.8                                                  | -193.876483            | 18.2                |
| <b>4-I</b>                | -193.931905            | -193.839749            | -193.833657            | 71.2                                                  | -193.867484            | 166.4               |
| <b>4-III</b>              | -193.934091            | -193.843322            | -193.837020            | 73.5                                                  | -193.871964            | 64.2                |
| <b>3-I</b>                | -233.294602            | -233.172350            | -233.165836            | 73.6                                                  | -233.200822            | 220.2               |
| <b>3-ts-rearr</b>         | -233.266845            | -233.145944            | -233.139629            | 73.5                                                  | -233.174555            | -279.9              |
| <b>3-II</b>               | -233.274581            | -233.153708            | -233.146671            | 79.2                                                  | -233.184308            | 22.6                |
| <b>3-ts-N3-I</b>          | -437.358527            | -437.183951            | -437.172698            | 99.9                                                  | -437.220178            | -254.5              |
| <b>3-ts-N3-II</b>         | -437.358352            | -437.183755            | -437.172485            | 100.1                                                 | -437.220035            | -262.7              |
| <b>3-ts-Im-I</b>          | -459.490404            | -459.294913            | -459.284066            | 100.3                                                 | -459.331718            | -149.5              |
| <b>3-ts-Im-II</b>         | -459.489721            | -459.294291            | -459.283418            | 100.6                                                 | -459.331231            | -149.6              |
| <b>12-ax-I</b>            | -347.804816            | -347.649578            | -347.640560            | 87.4                                                  | -347.682085            | 76.6                |
| <b>12-ax-II</b>           | -347.808374            | -347.652964            | -347.644036            | 86.6                                                  | -347.685177            | 91.2                |
| <b>12-eq-I</b>            | -347.805789            | -347.650487            | -347.641527            | 87.0                                                  | -347.682843            | 77.7                |
| <b>12-eq-II</b>           | -347.809663            | -347.654307            | -347.645385            | 86.5                                                  | -347.686470            | 101.3               |
| <b>12-ts-isom-I</b>       | -347.794583            | -347.639455            | -347.630927            | 85.7                                                  | -347.671634            | -195.1              |
| <b>12-ts-isom-II</b>      | -347.797951            | -347.642836            | -347.634293            | 85.8                                                  | -347.675050            | -189.8              |
| <b>12-ts-N3-C1-ax-I</b>   | -551.869777            | -551.662152            | -551.648313            | 113.7                                                 | -551.702345            | -232.6              |
| <b>12-ts-N3-C1-ax-II</b>  | -551.869730            | -551.662041            | -551.648227            | 113.4                                                 | -551.702127            | -238.6              |
| <b>12-ts-N3-C1-ax-III</b> | -551.873313            | -551.665602            | -551.651815            | 113.3                                                 | -551.705641            | -248.6              |
| <b>12-ts-N3-C1-ax-IV</b>  | -551.873040            | -551.665315            | -551.651532            | 113.3                                                 | -551.705373            | -255.8              |
| <b>12-ts-N3-C1-eq-I</b>   | -551.872162            | -551.664584            | -551.650777            | 113.5                                                 | -551.704692            | -215.3              |
| <b>12-ts-N3-C1-eq-II</b>  | -551.872052            | -551.664345            | -551.650636            | 112.5                                                 | -551.704111            | -215.3              |
| <b>12-ts-N3-C1-eq-III</b> | -551.875995            | -551.668317            | -551.654566            | 112.9                                                 | -551.708230            | -228.1              |
| <b>12-ts-N3-C1-eq-IV</b>  | -551.875920            | -551.668118            | -551.654438            | 112.5                                                 | -551.707867            | -231.7              |
| <b>12-ts-N3-C2-ax-I</b>   | -551.870525            | -551.662842            | -551.649073            | 112.8                                                 | -551.702648            | -199.5              |

|                           |             |             |             |       |             |        |
|---------------------------|-------------|-------------|-------------|-------|-------------|--------|
| <b>12-ts-N3-C2-ax-II</b>  | -551.871266 | -551.663722 | -551.649931 | 112.9 | -551.703574 | -212.5 |
| <b>12-ts-N3-C2-ax-III</b> | -551.871594 | -551.663903 | -551.650166 | 112.8 | -551.703737 | -290.4 |
| <b>12-ts-N3-C2-ax-IV</b>  | -551.870128 | -551.662248 | -551.648653 | 111.6 | -551.701666 | -315.8 |
| <b>12-ts-N3-C2-eq-I</b>   | -551.871229 | -551.663389 | -551.649739 | 111.3 | -551.702638 | -211.7 |
| <b>12-ts-N3-C2-eq-II</b>  | -551.870799 | -551.663099 | -551.649324 | 112.9 | -551.702944 | -254.1 |
| <b>12-ts-N3-C2-eq-III</b> | -551.870263 | -551.662308 | -551.648696 | 111.8 | -551.701819 | -340.1 |
| <b>12-ts-N3-C2-eq-IV</b>  | -551.869761 | -551.661668 | -551.648058 | 112.1 | -551.701326 | -351.3 |
| <b>12-ts-Im-C1-ax-I</b>   | -574.002341 | -573.773880 | -573.760421 | 114.7 | -573.814916 | -136.3 |
| <b>12-ts-Im-C1-ax-II</b>  | -574.001586 | -573.773181 | -573.759691 | 115.1 | -573.814384 | -137.7 |
| <b>12-ts-Im-C1-ax-III</b> | -574.005826 | -573.777163 | -573.763818 | 113.3 | -573.817653 | -140.7 |
| <b>12-ts-Im-C1-ax-IV</b>  | -574.005155 | -573.776492 | -573.763141 | 113.4 | -573.817012 | -139.9 |
| <b>12-ts-Im-C1-ax-V</b>   | -574.002596 | -573.773656 | -573.760443 | 112.6 | -573.813920 | -144.4 |
| <b>12-ts-Im-C1-ax-VI</b>  | -574.001827 | -573.772935 | -573.759692 | 113.0 | -573.813401 | -144.6 |
| <b>12-ts-Im-C1-eq-I</b>   | -574.005167 | -573.776671 | -573.763283 | 113.7 | -573.817317 | -130.2 |
| <b>12-ts-Im-C1-eq-II</b>  | -574.004410 | -573.775909 | -573.762522 | 113.8 | -573.816572 | -128.6 |
| <b>12-ts-Im-C1-eq-III</b> | -574.009116 | -573.780513 | -573.767187 | 112.9 | -573.820843 | -134.7 |
| <b>12-ts-Im-C1-eq-IV</b>  | -574.008479 | -573.779863 | -573.766533 | 113.1 | -573.820249 | -131.7 |
| <b>12-ts-Im-C1-eq-V</b>   | -574.006685 | -573.778075 | -573.764687 | 113.9 | -573.818796 | -135.3 |
| <b>12-ts-Im-C1-eq-VI</b>  | -574.006004 | -573.777504 | -573.764062 | 114.8 | -573.818605 | -133.5 |
| <b>12-ts-Im-C2-ax-I</b>   | -574.002396 | -573.774125 | -573.760587 | 114.9 | -573.815185 | -122.8 |
| <b>12-ts-Im-C2-ax-II</b>  | -574.002866 | -573.774556 | -573.761054 | 114.4 | -573.815409 | -121.7 |
| <b>12-ts-Im-C2-ax-III</b> | -574.003910 | -573.775438 | -573.762030 | 113.8 | -573.816099 | -122.4 |
| <b>12-ts-Im-C2-ax-IV</b>  | -574.003894 | -573.775305 | -573.761943 | 113.2 | -573.815751 | -119.8 |
| <b>12-ts-Im-C2-eq-I</b>   | -574.002460 | -573.774222 | -573.760689 | 114.7 | -573.815201 | -116.9 |
| <b>12-ts-Im-C2-eq-II</b>  | -574.002531 | -573.774280 | -573.760734 | 115.1 | -573.815434 | -119.5 |
| <b>12-ts-Im-C2-eq-III</b> | -574.004123 | -573.775543 | -573.762113 | 113.8 | -573.816198 | -129.3 |
| <b>12-ts-Im-C2-eq-IV</b>  | -574.004223 | -573.775521 | -573.762168 | 112.7 | -573.815730 | -129.0 |

<sup>a</sup> 1 Hartree = 627.5 kcal mol<sup>-1</sup>. <sup>b</sup> Thermal corrections at 298.15 K.

**H. Cartesian coordinates of the structures calculated at the PCM(THF)/M06-2X/6-311+G(2d,p) level.**

|                              |          |          |          |                                 |          |          |          |
|------------------------------|----------|----------|----------|---------------------------------|----------|----------|----------|
| Structure <b>methylazide</b> |          |          |          | H                               | -2.66393 | 1.59331  | 0.00050  |
| N                            | -0.39258 | -0.64808 | -0.00047 | H                               | -3.36300 | -0.83385 | -0.00023 |
| N                            | 0.71041  | -0.11252 | -0.00030 | H                               | -0.29088 | 2.23848  | 0.00015  |
| N                            | 1.75818  | 0.28788  | 0.00067  | O                               | 1.75139  | 0.65042  | -0.00028 |
| C                            | -1.52609 | 0.29808  | -0.00003 | C                               | 2.72833  | -0.38322 | -0.00020 |
| H                            | -2.42886 | -0.30374 | -0.00062 | H                               | 3.69590  | 0.10978  | 0.00018  |
| H                            | -1.51189 | 0.92553  | 0.89233  | H                               | 2.62274  | -1.00411 | 0.89112  |
| H                            | -1.51150 | 0.92671  | -0.89157 | H                               | 2.62324  | -1.00369 | -0.89187 |
| Structure <b>imidazole</b>   |          |          |          | Structure <b>11-II</b>          |          |          |          |
| N                            | 0.13485  | -1.22075 | 0.00009  | C                               | -1.98900 | 0.78248  | 0.00003  |
| C                            | -0.98467 | -0.53818 | 0.00002  | C                               | -2.34683 | -0.57312 | -0.00011 |
| C                            | 1.13640  | -0.27758 | -0.00009 | C                               | -1.17964 | -1.29985 | 0.00040  |
| H                            | -1.98091 | -0.94986 | 0.00003  | C                               | 0.01997  | -1.00337 | 0.00023  |
| C                            | 0.60478  | 0.97963  | 0.00010  | C                               | 0.42723  | 0.32815  | -0.00065 |
| H                            | 2.17723  | -0.55555 | -0.00014 | C                               | -0.65761 | 1.22580  | -0.00034 |
| H                            | -1.45425 | 1.52086  | -0.00013 | H                               | -2.77972 | 1.52426  | 0.00035  |
| H                            | 1.05236  | 1.95753  | 0.00016  | H                               | -3.36510 | -0.92799 | 0.00017  |
| N                            | -0.75351 | 0.79650  | -0.00007 | H                               | -0.47600 | 2.29196  | -0.00020 |
| Structure <b>1</b>           |          |          |          | O                               | 1.72716  | 0.66945  | -0.00040 |
| C                            | -0.70045 | 1.05163  | 0.00000  | C                               | 2.03567  | 2.05698  | -0.00069 |
| C                            | -1.45847 | -0.12952 | 0.00000  | H                               | 3.11943  | 2.12222  | -0.00033 |
| C                            | -0.61946 | -1.22723 | 0.00000  | H                               | 1.63730  | 2.54088  | -0.89441 |
| C                            | 0.61700  | -1.22753 | 0.00000  | H                               | 1.63667  | 2.54140  | 0.89247  |
| C                            | 1.45847  | -0.13200 | 0.00000  | Structure <b>11-ts-N3_C1-I</b>  |          |          |          |
| C                            | 0.70239  | 1.05047  | 0.00000  | C                               | 1.03114  | 2.38353  | 0.01151  |
| H                            | -1.22239 | 2.00135  | 0.00000  | C                               | -0.35718 | 2.22820  | 0.19146  |
| H                            | -2.53898 | -0.13017 | 0.00000  | C                               | -0.60998 | 0.88758  | 0.22227  |
| H                            | 2.53896  | -0.13472 | 0.00000  | C                               | 0.04500  | -0.17424 | 0.13610  |
| H                            | 1.22597  | 1.99929  | 0.00000  | C                               | 1.42126  | -0.02791 | -0.03947 |
| Structure <b>1-ts-N3</b>     |          |          |          | C                               | 1.89551  | 1.29472  | -0.10113 |
| C                            | -2.40041 | -1.04392 | 0.11052  | H                               | 1.43818  | 3.38681  | -0.03732 |
| C                            | -1.03721 | -1.29213 | 0.32094  | H                               | -1.05136 | 3.04825  | 0.28891  |
| C                            | -0.34009 | -0.12003 | 0.18435  | H                               | 2.95743  | 1.45804  | -0.23720 |
| C                            | -0.66799 | 1.06444  | -0.06977 | N                               | -2.66196 | -1.81229 | 0.37137  |
| C                            | -2.02268 | 1.34412  | -0.28376 | N                               | -2.91830 | -0.72540 | 0.30680  |
| C                            | -2.87684 | 0.24176  | -0.18448 | O                               | 2.31285  | -1.03399 | -0.15280 |
| H                            | -3.09925 | -1.86873 | 0.18242  | C                               | 1.77234  | -2.34549 | -0.07403 |
| H                            | -0.64298 | -2.27069 | 0.55687  | H                               | 1.05078  | -2.50998 | -0.87626 |
| H                            | -2.41481 | 2.32890  | -0.50821 | H                               | 2.61111  | -3.02782 | -0.17890 |
| H                            | -3.94113 | 0.38093  | -0.33587 | H                               | 1.28046  | -2.49868 | 0.88811  |
| N                            | 2.33194  | 1.80157  | 0.15446  | N                               | -3.08105 | 0.49444  | 0.33507  |
| N                            | 2.22766  | 0.69335  | 0.25179  | C                               | -3.62084 | 1.06458  | -0.91726 |
| N                            | 1.91273  | -0.48468 | 0.44338  | H                               | -3.61378 | 2.14237  | -0.78902 |
| C                            | 2.36758  | -1.42312 | -0.60361 | H                               | -2.99570 | 0.79492  | -1.76981 |
| H                            | 3.45340  | -1.51271 | -0.59186 | H                               | -4.64450 | 0.72882  | -1.08433 |
| H                            | 1.92756  | -2.38495 | -0.35970 | Structure <b>11-ts-N3_C1-II</b> |          |          |          |
| H                            | 2.02678  | -1.10301 | -1.58904 | C                               | 0.90423  | 2.44654  | 0.11028  |
| Structure <b>11-I</b>        |          |          |          | C                               | -0.47621 | 2.24238  | 0.22764  |
| C                            | -1.90640 | 0.81795  | 0.00011  | C                               | -0.68913 | 0.88847  | 0.21946  |
| C                            | -2.32940 | -0.52721 | -0.00035 | C                               | 0.01316  | -0.13959 | 0.13942  |
| C                            | -1.19975 | -1.29829 | -0.00018 | C                               | 1.39255  | 0.04712  | 0.02329  |
| C                            | 0.02134  | -1.08018 | -0.00019 | C                               | 1.81859  | 1.38735  | 0.01022  |
| C                            | 0.47393  | 0.23653  | -0.00059 | H                               | 1.28144  | 3.46268  | 0.09960  |
| C                            | -0.56207 | 1.18996  | -0.00014 | H                               | -1.20170 | 3.03646  | 0.31345  |
|                              |          |          |          | H                               | 2.86909  | 1.62851  | -0.07533 |
|                              |          |          |          | N                               | -2.66610 | -1.85558 | 0.32617  |

|   |          |          |          |   |         |          |          |
|---|----------|----------|----------|---|---------|----------|----------|
| N | -2.93323 | -0.77229 | 0.25447  | C | 2.34723 | -0.10150 | 0.64967  |
| O | 2.21575  | -1.02010 | -0.06621 | H | 1.58976 | -1.86698 | -0.48632 |
| C | 3.60706  | -0.76491 | -0.17855 | H | 0.88639 | -1.71404 | 1.14610  |
| H | 3.97549  | -0.22477 | 0.69615  | H | 3.26526 | -0.23255 | 0.08476  |
| H | 4.08773  | -1.73714 | -0.23605 | H | 2.57514 | -0.08827 | 1.71127  |
| H | 3.82638  | -0.19334 | -1.08294 | H | 2.15288 | 1.75040  | -0.56997 |
| N | -3.10149 | 0.44803  | 0.27667  | H | 1.44327 | 1.88926  | 1.06813  |
| C | -3.64873 | 1.00881  | -0.97662 |   |         |          |          |
| H | -3.65711 | 2.08674  | -0.84936 |   |         |          |          |
| H | -3.01950 | 0.74658  | -1.82843 |   |         |          |          |
| H | -4.66751 | 0.65862  | -1.14324 |   |         |          |          |

Structure 11-ts-N3\_C2-I

|   |          |          |          |
|---|----------|----------|----------|
| C | 1.87690  | 1.08069  | -0.00013 |
| C | 1.32053  | -0.20799 | -0.04865 |
| C | -0.06668 | -0.26671 | -0.02230 |
| C | -0.71604 | 0.81641  | 0.03276  |
| C | -0.33110 | 2.13202  | 0.09107  |
| C | 1.06995  | 2.21650  | 0.06698  |
| H | 2.95562  | 1.17940  | -0.01410 |
| H | 1.53941  | 3.19293  | 0.09792  |
| N | -2.84819 | 0.33877  | -0.05316 |
| N | -2.67593 | -0.78279 | -0.12179 |
| H | -0.97674 | 2.99660  | 0.13784  |
| O | 2.16295  | -1.26491 | -0.11077 |
| C | 1.54262  | -2.54114 | -0.09103 |
| H | 0.84679  | -2.64515 | -0.92598 |
| H | 2.34236  | -3.27177 | -0.17514 |
| H | 1.00213  | -2.68499 | 0.84736  |
| N | -2.05555 | -1.81960 | -0.29617 |
| C | -2.13441 | -2.82651 | 0.77707  |
| H | -1.95456 | -2.37414 | 1.75220  |
| H | -3.10879 | -3.31389 | 0.75987  |
| H | -1.36635 | -3.56174 | 0.55942  |

Structure 11-ts-N3\_C2-II

|   |          |          |          |
|---|----------|----------|----------|
| C | 1.88388  | 1.16139  | 0.10013  |
| C | 1.15119  | -0.02623 | -0.04951 |
| C | -0.20193 | 0.23810  | -0.10562 |
| C | -0.80881 | 1.33073  | -0.05271 |
| C | -0.14309 | 2.54961  | 0.09570  |
| C | 1.24269  | 2.41013  | 0.16897  |
| H | 2.96346  | 1.12580  | 0.16175  |
| H | 1.86022  | 3.29477  | 0.28059  |
| N | -3.35090 | -0.28476 | -0.38249 |
| N | -2.50874 | -1.01753 | -0.31418 |
| H | -0.61781 | 3.52034  | 0.14707  |
| O | 1.65150  | -1.27484 | -0.13061 |
| C | 3.06504  | -1.40439 | -0.06759 |
| H | 3.44618  | -1.02815 | 0.88382  |
| H | 3.27372  | -2.46677 | -0.15186 |
| H | 3.53897  | -0.86943 | -0.89280 |
| N | -1.43411 | -1.62534 | -0.32521 |
| C | -1.20474 | -2.50788 | 0.83859  |
| H | -1.35716 | -1.96637 | 1.77306  |
| H | -1.86498 | -3.37321 | 0.79329  |
| H | -0.17106 | -2.82874 | 0.76524  |

Structure 4-II

|   |         |          |          |
|---|---------|----------|----------|
| C | 0.41699 | -0.09200 | -0.18207 |
| C | 0.03747 | 1.07079  | -0.45054 |
| C | 1.61400 | 1.23873  | 0.21859  |
| C | 1.28665 | -1.17254 | 0.29289  |

Structure 4-I

|   |          |          |          |
|---|----------|----------|----------|
| C | -0.12490 | -0.46442 | -0.25326 |
| C | 1.08555  | -0.46360 | -0.19531 |
| C | 1.72971  | 0.88005  | 0.07010  |
| C | 0.47498  | 1.79388  | -0.21646 |
| C | -0.79761 | 0.87533  | -0.04843 |
| H | 2.06244  | 0.93422  | 1.10670  |
| H | 2.57369  | 1.12116  | -0.57225 |
| H | 0.44453  | 2.69602  | 0.39750  |
| H | 0.52317  | 2.11161  | -1.25903 |
| H | -1.22554 | 0.92720  | 0.95277  |
| H | -1.57883 | 1.11386  | -0.76658 |

Structure 4-III

|   |          |          |          |
|---|----------|----------|----------|
| C | 0.54061  | -0.10712 | -0.12892 |
| C | 0.63918  | -1.32442 | -0.52699 |
| C | 1.54899  | 1.02859  | 0.12625  |
| C | 0.42561  | 2.02878  | -0.23542 |
| C | -0.61739 | 0.90407  | -0.03499 |
| H | 1.80815  | 1.05975  | 1.18382  |
| H | 2.44645  | 1.01205  | -0.48472 |
| H | 0.32806  | 2.90862  | 0.39541  |
| H | 0.48618  | 2.32823  | -1.27979 |
| H | -1.03148 | 0.89637  | 0.97252  |
| H | -1.40717 | 0.79041  | -0.77143 |

Structure 3-I

|   |         |          |          |
|---|---------|----------|----------|
| C | 1.29419 | -0.05998 | -0.80867 |
| C | 2.72869 | -0.20708 | -1.14298 |
| C | 3.20266 | 1.28607  | -1.14312 |
| C | 2.61327 | 2.14900  | -0.01384 |
| C | 1.05020 | 2.25222  | -0.01478 |
| C | 0.66439 | 0.86286  | -0.34946 |
| H | 4.29291 | 1.30385  | -1.07422 |
| H | 3.24406 | -0.79092 | -0.37842 |
| H | 2.92770 | -0.67183 | -2.10797 |
| H | 2.92190 | 1.73493  | 0.94966  |
| H | 3.02742 | 3.15774  | -0.08188 |
| H | 0.68947 | 2.60688  | 0.95006  |
| H | 0.69478 | 2.94499  | -0.77947 |
| H | 2.93022 | 1.72492  | -2.10657 |

Structure 3-ts-rearr

|   |         |          |          |
|---|---------|----------|----------|
| C | 1.30547 | 0.25929  | -0.64916 |
| C | 2.67678 | -0.04367 | -1.07879 |
| C | 3.33183 | 1.35082  | -1.16852 |
| C | 2.70821 | 2.13511  | -0.02366 |
| C | 1.17647 | 2.05317  | -0.11365 |
| C | 0.14194 | 0.56968  | -0.32051 |
| H | 4.41713 | 1.28835  | -1.10438 |
| H | 3.17994 | -0.66347 | -0.33495 |
| H | 2.68057 | -0.57047 | -2.03236 |
| H | 3.03445 | 1.71399  | 0.93016  |
| H | 2.98755 | 3.19054  | -0.03612 |
| H | 0.73590 | 2.34647  | 0.83221  |

|   |         |         |          |
|---|---------|---------|----------|
| H | 0.79515 | 2.67101 | -0.92078 |
| H | 3.07004 | 1.81090 | -2.12344 |

Structure **3-II**

|   |         |          |          |
|---|---------|----------|----------|
| C | 1.20585 | 0.53912  | -0.38174 |
| C | 2.55640 | 0.04789  | -0.92843 |
| C | 3.30302 | 1.36195  | -1.20406 |
| C | 2.82102 | 2.28966  | -0.09236 |
| C | 1.30716 | 2.03331  | -0.03613 |
| C | 0.15609 | -0.19238 | -0.24148 |
| H | 4.38305 | 1.21735  | -1.21219 |
| H | 3.06216 | -0.51901 | -0.14524 |
| H | 2.44896 | -0.59064 | -1.80213 |
| H | 3.28003 | 2.00189  | 0.85630  |
| H | 3.04515 | 3.34028  | -0.27495 |
| H | 0.85454 | 2.27327  | 0.92316  |
| H | 0.79557 | 2.60446  | -0.81236 |
| H | 3.00358 | 1.76004  | -2.17635 |

Structure **3-ts-N3-I**

|   |          |          |          |
|---|----------|----------|----------|
| C | -2.29338 | -1.03150 | -0.35073 |
| C | -2.68540 | 0.18136  | 0.50444  |
| C | -1.89476 | 1.46141  | 0.14006  |
| C | -0.45046 | 1.07638  | -0.03601 |
| C | -0.12496 | -0.10961 | -0.16744 |
| C | -0.79192 | -1.42130 | -0.20795 |
| H | -2.26413 | 1.88829  | -0.79658 |
| H | -2.50130 | -0.05345 | 1.55763  |
| H | -3.75742 | 0.36794  | 0.39986  |
| H | -2.48637 | -0.80319 | -1.40271 |
| H | -2.91020 | -1.89212 | -0.08482 |
| H | -0.62109 | -1.98566 | 0.71302  |
| H | -0.47740 | -2.04698 | -1.04529 |
| N | 2.19980  | 1.89298  | -0.10611 |
| N | 2.27750  | 0.77711  | -0.18964 |
| N | 1.91123  | -0.39623 | -0.37567 |
| C | 2.43780  | -1.39527 | 0.56901  |
| H | 2.22948  | -1.10882 | 1.60099  |
| H | 1.92618  | -2.32505 | 0.33683  |
| H | 3.50808  | -1.53391 | 0.42451  |
| H | -2.03686 | 2.22709  | 0.90458  |

Structure **3-ts-N3-II**

|   |          |          |          |
|---|----------|----------|----------|
| C | 2.25464  | -1.11921 | 0.21685  |
| C | 2.76069  | 0.25811  | -0.23239 |
| C | 1.90091  | 1.42695  | 0.30839  |
| C | 0.45871  | 1.04449  | 0.12225  |
| C | 0.12730  | -0.12968 | -0.07573 |
| C | 0.80019  | -1.42690 | -0.25160 |
| H | 2.09459  | 1.58689  | 1.37265  |
| H | 2.75464  | 0.29956  | -1.32605 |
| H | 3.79798  | 0.38543  | 0.08818  |
| H | 2.27653  | -1.16643 | 1.30936  |
| H | 2.91870  | -1.90152 | -0.15592 |
| H | 0.77652  | -1.74377 | -1.29733 |
| H | 0.37863  | -2.23459 | 0.34945  |
| N | -2.12929 | 1.92210  | -0.01117 |
| N | -2.25215 | 0.81800  | -0.17303 |
| N | -1.91430 | -0.35354 | -0.41492 |
| C | -2.54029 | -1.39198 | 0.41988  |
| H | -3.60719 | -1.45983 | 0.21267  |
| H | -2.06732 | -2.32877 | 0.14035  |
| H | -2.37370 | -1.19725 | 1.48042  |

|   |         |         |          |
|---|---------|---------|----------|
| H | 2.16204 | 2.35785 | -0.19763 |
|---|---------|---------|----------|

Structure **3-ts-Im-I**

|   |          |          |          |
|---|----------|----------|----------|
| C | -3.34567 | -0.11599 | 0.39843  |
| C | -2.76449 | 1.14594  | -0.25309 |
| C | -1.23626 | 1.31376  | 0.01012  |
| C | -0.76644 | -0.06588 | -0.08225 |
| C | -1.16710 | -1.23590 | -0.12827 |
| C | -2.67815 | -1.41233 | -0.11013 |
| H | -0.79085 | 1.97720  | -0.73284 |
| H | -2.91841 | 1.09117  | -1.33441 |
| H | -3.28691 | 2.03415  | 0.10700  |
| H | -3.20349 | -0.05211 | 1.48207  |
| H | -4.42368 | -0.15557 | 0.21893  |
| H | -3.01158 | -1.63823 | -1.12732 |
| H | -2.98419 | -2.26049 | 0.50559  |
| N | 1.39680  | 0.16289  | -0.01595 |
| C | 2.37621  | 1.12558  | 0.02583  |
| C | 2.00654  | -0.99399 | -0.01413 |
| C | 3.60034  | 0.52333  | 0.05296  |
| H | 2.14375  | 2.17751  | 0.03388  |
| H | 1.50549  | -1.94964 | -0.04262 |
| H | 4.60029  | 0.91862  | 0.08700  |
| H | 4.03310  | -1.56192 | 0.03637  |
| N | 3.34470  | -0.82523 | 0.02687  |
| H | -1.04456 | 1.73719  | 0.99963  |

Structure **3-ts-Im-II**

|   |          |          |          |
|---|----------|----------|----------|
| C | -2.75278 | -1.15914 | 0.25061  |
| C | -3.34955 | 0.09707  | -0.39784 |
| C | -2.69930 | 1.40035  | 0.11584  |
| C | -1.18722 | 1.24184  | 0.13500  |
| C | -0.76870 | 0.07867  | 0.08607  |
| C | -1.22224 | -1.30652 | -0.01151 |
| H | -3.01552 | 2.24662  | -0.49737 |
| H | -3.20499 | 0.03855  | -1.48149 |
| H | -4.42825 | 0.12195  | -0.21978 |
| H | -2.90846 | -1.10928 | 1.33193  |
| H | -3.26353 | -2.05297 | -0.11242 |
| H | -1.02510 | -1.72434 | -1.00244 |
| H | -0.77060 | -1.96786 | 0.72985  |
| N | 1.39525  | -0.11716 | 0.01607  |
| C | 2.05753  | 1.07889  | 0.00384  |
| C | 2.30975  | -1.05768 | -0.01481 |
| C | 3.40201  | 0.85284  | -0.03480 |
| H | 1.50760  | 2.00676  | 0.02588  |
| H | 2.13282  | -2.12100 | -0.01542 |
| H | 4.24769  | 1.51709  | -0.05438 |
| H | 4.41620  | -1.02164 | -0.07224 |
| N | 3.54572  | -0.51278 | -0.04643 |
| H | -3.03686 | 1.61861  | 1.13335  |

Structure **12-ax-I**

|   |          |          |          |
|---|----------|----------|----------|
| C | 1.28779  | 1.13871  | -0.32359 |
| C | 0.14193  | 0.93487  | 0.67895  |
| C | -0.65691 | -0.40386 | 0.50726  |
| C | 0.43301  | -1.36646 | 0.21188  |
| C | 1.58584  | -1.18015 | -0.09602 |
| C | 2.40076  | 0.03849  | -0.26854 |
| H | -1.19410 | -0.62747 | 1.43468  |
| H | 0.53460  | 0.95483  | 1.69935  |
| H | -0.56646 | 1.76214  | 0.58829  |
| H | 0.87645  | 1.15158  | -1.33541 |

|                                   |          |          |          |   |          |          |          |
|-----------------------------------|----------|----------|----------|---|----------|----------|----------|
| H                                 | 1.75101  | 2.11155  | -0.14449 | O | -1.82355 | 0.46028  | -0.38705 |
| H                                 | 3.06464  | 0.17758  | 0.58660  | C | -2.90143 | -0.33488 | 0.06114  |
| H                                 | 3.00755  | 0.05713  | -1.17258 | H | -3.09822 | -0.16198 | 1.12419  |
| O                                 | -1.56963 | -0.36172 | -0.56679 | H | -3.77637 | -0.05407 | -0.52042 |
| C                                 | -2.81062 | 0.21808  | -0.21192 | H | -2.68293 | -1.39658 | -0.09291 |
| H                                 | -2.69299 | 1.25132  | 0.12691  |   |          |          |          |
| H                                 | -3.43309 | 0.20795  | -1.10373 |   |          |          |          |
| H                                 | -3.29819 | -0.36279 | 0.57704  |   |          |          |          |
| <b>Structure 12-ax-II</b>         |          |          |          |   |          |          |          |
| C                                 | 1.57527  | 0.82924  | -0.54894 |   |          |          |          |
| C                                 | 0.52126  | 1.20478  | 0.50373  |   |          |          |          |
| C                                 | -0.67449 | 0.21764  | 0.62101  |   |          |          |          |
| C                                 | -0.00438 | -1.12469 | 0.50525  |   |          |          |          |
| C                                 | 1.12295  | -1.36490 | 0.14136  |   |          |          |          |
| C                                 | 2.26980  | -0.55304 | -0.30119 |   |          |          |          |
| H                                 | -1.18184 | 0.35141  | 1.58221  |   |          |          |          |
| H                                 | 0.99143  | 1.26732  | 1.48847  |   |          |          |          |
| H                                 | 0.10672  | 2.18845  | 0.27203  |   |          |          |          |
| H                                 | 1.10127  | 0.79832  | -1.53216 |   |          |          |          |
| H                                 | 2.34430  | 1.60417  | -0.57804 |   |          |          |          |
| H                                 | 3.02421  | -0.49189 | 0.48515  |   |          |          |          |
| H                                 | 2.75597  | -0.90735 | -1.20898 |   |          |          |          |
| O                                 | -1.57653 | 0.46297  | -0.42480 |   |          |          |          |
| C                                 | -2.71644 | -0.36931 | -0.36482 |   |          |          |          |
| H                                 | -3.24205 | -0.24080 | 0.58707  |   |          |          |          |
| H                                 | -3.37190 | -0.08131 | -1.18339 |   |          |          |          |
| H                                 | -2.43159 | -1.42056 | -0.47563 |   |          |          |          |
| <b>Structure 12-eq-I</b>          |          |          |          |   |          |          |          |
| C                                 | 1.54680  | 1.12735  | 0.22617  |   |          |          |          |
| C                                 | 0.07606  | 0.97378  | -0.19008 |   |          |          |          |
| C                                 | -0.62872 | -0.31326 | 0.35451  |   |          |          |          |
| C                                 | 0.40466  | -1.35547 | 0.12891  |   |          |          |          |
| C                                 | 1.59753  | -1.19834 | 0.00606  |   |          |          |          |
| C                                 | 2.48455  | -0.04775 | -0.22699 |   |          |          |          |
| H                                 | -0.82313 | -0.21085 | 1.43005  |   |          |          |          |
| H                                 | -0.00643 | 0.93828  | -1.28037 |   |          |          |          |
| H                                 | -0.47571 | 1.85096  | 0.15694  |   |          |          |          |
| H                                 | 1.60523  | 1.20115  | 1.31496  |   |          |          |          |
| H                                 | 1.94132  | 2.05966  | -0.18353 |   |          |          |          |
| H                                 | 2.74358  | 0.03365  | -1.28358 |   |          |          |          |
| H                                 | 3.40582  | -0.04871 | 0.35330  |   |          |          |          |
| O                                 | -1.83726 | -0.58924 | -0.31044 |   |          |          |          |
| C                                 | -2.86445 | 0.33163  | 0.00206  |   |          |          |          |
| H                                 | -2.67147 | 1.31558  | -0.43326 |   |          |          |          |
| H                                 | -3.78646 | -0.06559 | -0.41646 |   |          |          |          |
| H                                 | -2.97686 | 0.43570  | 1.08660  |   |          |          |          |
| <b>Structure 12-eq-II</b>         |          |          |          |   |          |          |          |
| C                                 | 1.87255  | 0.85117  | 0.27142  |   |          |          |          |
| C                                 | 0.44643  | 1.18371  | -0.18819 |   |          |          |          |
| C                                 | -0.63750 | 0.19049  | 0.30213  |   |          |          |          |
| C                                 | -0.01274 | -1.16058 | 0.05106  |   |          |          |          |
| C                                 | 1.17977  | -1.35152 | -0.04279 |   |          |          |          |
| C                                 | 2.39907  | -0.55042 | -0.20492 |   |          |          |          |
| H                                 | -0.80553 | 0.29586  | 1.38142  |   |          |          |          |
| H                                 | 0.39713  | 1.19488  | -1.28032 |   |          |          |          |
| H                                 | 0.17472  | 2.18133  | 0.16480  |   |          |          |          |
| H                                 | 1.91417  | 0.87194  | 1.36315  |   |          |          |          |
| H                                 | 2.55799  | 1.61768  | -0.09536 |   |          |          |          |
| H                                 | 2.71218  | -0.52321 | -1.24953 |   |          |          |          |
| H                                 | 3.24592  | -0.86801 | 0.40123  |   |          |          |          |
| <b>Structure 12-ts-isom-I</b>     |          |          |          |   |          |          |          |
| C                                 | -3.78046 | 0.52446  | 1.07270  |   |          |          |          |
| C                                 | -2.30719 | 0.77919  | 0.62735  |   |          |          |          |
| C                                 | -1.67735 | 0.03028  | -0.62365 |   |          |          |          |
| C                                 | -2.59998 | -1.08278 | -0.89773 |   |          |          |          |
| C                                 | -3.77099 | -1.16283 | -0.61420 |   |          |          |          |
| C                                 | -4.71523 | -0.45537 | 0.24147  |   |          |          |          |
| H                                 | -1.66742 | 0.70848  | -1.48496 |   |          |          |          |
| H                                 | -2.16666 | 1.84908  | 0.46537  |   |          |          |          |
| H                                 | -1.65775 | 0.49954  | 1.45821  |   |          |          |          |
| H                                 | -3.74789 | 0.12062  | 2.08317  |   |          |          |          |
| H                                 | -4.30133 | 1.47976  | 1.13659  |   |          |          |          |
| H                                 | -5.43916 | 0.09921  | -0.35537 |   |          |          |          |
| H                                 | -5.27139 | -1.09790 | 0.92234  |   |          |          |          |
| O                                 | -0.35712 | -0.38734 | -0.36709 |   |          |          |          |
| C                                 | 0.55473  | 0.69258  | -0.31998 |   |          |          |          |
| H                                 | 0.35291  | 1.35523  | 0.52653  |   |          |          |          |
| H                                 | 1.54939  | 0.26739  | -0.20743 |   |          |          |          |
| H                                 | 0.51299  | 1.27540  | -1.24642 |   |          |          |          |
| <b>Structure 12-ts-isom-II</b>    |          |          |          |   |          |          |          |
| C                                 | -3.77622 | 0.48291  | 1.09329  |   |          |          |          |
| C                                 | -2.30319 | 0.75709  | 0.66432  |   |          |          |          |
| C                                 | -1.68393 | 0.07566  | -0.60801 |   |          |          |          |
| C                                 | -2.57771 | -1.07543 | -0.94173 |   |          |          |          |
| C                                 | -3.75046 | -1.13022 | -0.65092 |   |          |          |          |
| C                                 | -4.70816 | -0.44073 | 0.20024  |   |          |          |          |
| H                                 | -1.70726 | 0.76791  | -1.45769 |   |          |          |          |
| H                                 | -2.15419 | 1.83115  | 0.54621  |   |          |          |          |
| H                                 | -1.65365 | 0.44152  | 1.48054  |   |          |          |          |
| H                                 | -3.74712 | 0.01601  | 2.07623  |   |          |          |          |
| H                                 | -4.29532 | 1.43363  | 1.21478  |   |          |          |          |
| H                                 | -5.40122 | 0.15110  | -0.39768 |   |          |          |          |
| H                                 | -5.29680 | -1.09471 | 0.84169  |   |          |          |          |
| O                                 | -0.34841 | -0.23112 | -0.31156 |   |          |          |          |
| C                                 | 0.35415  | -0.71028 | -1.43882 |   |          |          |          |
| H                                 | -0.10440 | -1.63146 | -1.81304 |   |          |          |          |
| H                                 | 0.36051  | 0.03500  | -2.24096 |   |          |          |          |
| H                                 | 1.37502  | -0.91283 | -1.12341 |   |          |          |          |
| <b>Structure 12-ts-N3-C1-ax-I</b> |          |          |          |   |          |          |          |
| C                                 | -1.09479 | 1.99490  | -0.33829 |   |          |          |          |
| C                                 | -1.82060 | 1.14282  | 0.70841  |   |          |          |          |
| C                                 | -1.57933 | -0.37883 | 0.53713  |   |          |          |          |
| C                                 | -0.11857 | -0.58884 | 0.23634  |   |          |          |          |
| C                                 | 0.59436  | 0.37308  | -0.07543 |   |          |          |          |
| C                                 | 0.45005  | 1.82080  | -0.28642 |   |          |          |          |
| H                                 | -1.87065 | -0.89275 | 1.46073  |   |          |          |          |
| H                                 | -1.48181 | 1.42614  | 1.71001  |   |          |          |          |
| H                                 | -2.89376 | 1.34492  | 0.66643  |   |          |          |          |
| H                                 | -1.43891 | 1.70426  | -1.33366 |   |          |          |          |
| H                                 | -1.34097 | 3.04883  | -0.19788 |   |          |          |          |
| H                                 | 0.88058  | 2.38782  | 0.54383  |   |          |          |          |
| H                                 | 0.91130  | 2.17412  | -1.20997 |   |          |          |          |
| O                                 | -2.34038 | -0.91361 | -0.53602 |   |          |          |          |
| N                                 | 2.04540  | -2.34909 | 0.06885  |   |          |          |          |
| N                                 | 2.49187  | -1.34617 | -0.15466 |   |          |          |          |

|   |          |          |          |
|---|----------|----------|----------|
| N | 2.55423  | -0.14079 | -0.45270 |
| C | 3.51366  | 0.66611  | 0.32091  |
| H | 3.33628  | 0.56727  | 1.39279  |
| H | 3.35267  | 1.69615  | 0.01586  |
| H | 4.53621  | 0.38066  | 0.07932  |
| C | -3.66894 | -1.22325 | -0.17224 |
| H | -4.21605 | -0.34009 | 0.17162  |
| H | -4.16209 | -1.61717 | -1.05883 |
| H | -3.68967 | -1.98122 | 0.61775  |

Structure **12-ts-N3-C1-ax-II**

|   |          |          |          |
|---|----------|----------|----------|
| C | 1.15714  | 1.97651  | 0.17752  |
| C | 1.95218  | 1.02559  | -0.72324 |
| C | 1.61148  | -0.46716 | -0.48638 |
| C | 0.11215  | -0.58261 | -0.40159 |
| C | -0.57834 | 0.42289  | -0.19595 |
| C | -0.38108 | 1.87036  | -0.03441 |
| H | 2.01432  | -1.06406 | -1.31291 |
| H | 1.74740  | 1.25440  | -1.77372 |
| H | 3.02257  | 1.18119  | -0.56632 |
| H | 1.37633  | 1.73974  | 1.22130  |
| H | 1.47014  | 3.00710  | 0.00140  |
| H | -0.70000 | 2.40784  | -0.93128 |
| H | -0.90889 | 2.29998  | 0.81829  |
| O | 2.16728  | -0.94719 | 0.72910  |
| N | -2.09942 | -2.22525 | -0.50050 |
| N | -2.54470 | -1.21505 | -0.30537 |
| N | -2.61118 | 0.02335  | -0.21668 |
| C | -3.33314 | 0.54768  | 0.95530  |
| H | -4.38697 | 0.27823  | 0.90719  |
| H | -3.24372 | 1.62865  | 0.90630  |
| H | -2.89173 | 0.18193  | 1.88355  |
| C | 3.51957  | -1.33427 | 0.60458  |
| H | 4.15780  | -0.49969 | 0.29888  |
| H | 3.84524  | -1.68427 | 1.58225  |
| H | 3.62687  | -2.14601 | -0.12236 |

Structure **12-ts-N3-C1-ax-III**

|   |          |          |          |
|---|----------|----------|----------|
| C | -1.19406 | 2.09867  | -0.43881 |
| C | -1.92852 | 1.33705  | 0.66999  |
| C | -1.70747 | -0.18805 | 0.62779  |
| C | -0.24393 | -0.45326 | 0.32381  |
| C | 0.47885  | 0.47850  | -0.05210 |
| C | 0.34767  | 1.90851  | -0.37061 |
| H | -1.98479 | -0.62254 | 1.59614  |
| H | -1.58538 | 1.69658  | 1.64469  |
| H | -3.00211 | 1.52886  | 0.60919  |
| H | -1.54236 | 1.74059  | -1.41027 |
| H | -1.42730 | 3.16299  | -0.37581 |
| H | 0.78580  | 2.53126  | 0.41451  |
| H | 0.81427  | 2.18531  | -1.31734 |
| O | -2.55813 | -0.72613 | -0.36489 |
| N | 1.85106  | -2.24673 | 0.23517  |
| N | 2.33462  | -1.28056 | -0.06508 |
| N | 2.41681  | -0.09839 | -0.44255 |
| C | 3.41673  | 0.73405  | 0.24719  |
| H | 3.28166  | 0.69679  | 1.32904  |
| H | 3.25698  | 1.74841  | -0.10741 |
| H | 4.42503  | 0.42070  | -0.01861 |
| C | -2.51424 | -2.13553 | -0.42261 |
| H | -2.76648 | -2.57239 | 0.55018  |
| H | -3.24929 | -2.45175 | -1.16026 |
| H | -1.52107 | -2.48441 | -0.71834 |

Structure **12-ts-N3-C1-ax-IV**

|   |          |          |          |
|---|----------|----------|----------|
| C | 1.33012  | 2.03442  | 0.36958  |
| C | 2.13614  | 1.15197  | -0.58949 |
| C | 1.75782  | -0.34030 | -0.52073 |
| C | 0.24340  | -0.43611 | -0.47430 |
| C | -0.42814 | 0.56925  | -0.21330 |
| C | -0.19955 | 1.98994  | 0.08832  |
| H | 2.15500  | -0.85922 | -1.40166 |
| H | 1.97588  | 1.48955  | -1.61757 |
| H | 3.20344  | 1.24488  | -0.37605 |
| H | 1.50154  | 1.69481  | 1.39345  |
| H | 1.67512  | 3.06773  | 0.30320  |
| H | -0.46871 | 2.61722  | -0.76552 |
| H | -0.75217 | 2.35310  | 0.95612  |
| O | 2.35812  | -0.89302 | 0.63326  |
| N | -1.95283 | -2.01880 | -0.70305 |
| N | -2.41396 | -1.02730 | -0.44969 |
| N | -2.47158 | 0.20418  | -0.28712 |
| C | -3.21358 | 0.66950  | 0.89616  |
| H | -4.26877 | 0.41479  | 0.81125  |
| H | -3.11329 | 1.75065  | 0.90976  |
| H | -2.79642 | 0.24833  | 1.81218  |
| C | 2.16143  | -2.28660 | 0.73958  |
| H | 2.54004  | -2.80159 | -0.15039 |
| H | 2.71408  | -2.62577 | 1.61358  |
| H | 1.10067  | -2.52426 | 0.85904  |

Structure **12-ts-N3-C1-eq-I**

|   |          |          |          |
|---|----------|----------|----------|
| C | -0.87916 | 2.21424  | 0.15223  |
| C | -1.88758 | 1.14633  | -0.28798 |
| C | -1.60026 | -0.22968 | 0.35771  |
| C | -0.14762 | -0.52822 | 0.15893  |
| C | 0.64578  | 0.41269  | 0.00076  |
| C | 0.59243  | 1.86716  | -0.21756 |
| H | -1.80078 | -0.16819 | 1.43739  |
| H | -1.85401 | 1.01739  | -1.37438 |
| H | -2.89316 | 1.48298  | -0.02487 |
| H | -0.93998 | 2.33079  | 1.23787  |
| H | -1.13867 | 3.17760  | -0.28990 |
| H | 0.80869  | 2.10787  | -1.26136 |
| H | 1.27975  | 2.43948  | 0.40743  |
| O | -2.41025 | -1.26002 | -0.18492 |
| N | 1.93226  | -2.41414 | -0.13415 |
| N | 2.41790  | -1.41189 | -0.23979 |
| N | 2.55398  | -0.18619 | -0.39786 |
| C | 3.57373  | 0.46011  | 0.44748  |
| H | 4.56625  | 0.08731  | 0.20027  |
| H | 3.52758  | 1.52040  | 0.21829  |
| H | 3.36204  | 0.30092  | 1.50570  |
| C | -3.77953 | -1.11993 | 0.12718  |
| H | -4.24545 | -0.30194 | -0.42946 |
| H | -4.26922 | -2.05288 | -0.14608 |
| H | -3.92088 | -0.94366 | 1.19985  |

Structure **12-ts-N3-C1-eq-II**

|   |          |          |          |
|---|----------|----------|----------|
| C | 0.92259  | 2.19955  | -0.28585 |
| C | 1.85083  | 1.13322  | 0.30938  |
| C | 1.62728  | -0.25877 | -0.32677 |
| C | 0.15458  | -0.53015 | -0.33923 |
| C | -0.63511 | 0.42438  | -0.28048 |
| C | -0.58741 | 1.88172  | -0.08286 |
| H | 1.98427  | -0.23875 | -1.36702 |

|   |          |          |          |   |          |          |          |
|---|----------|----------|----------|---|----------|----------|----------|
| H | 1.67684  | 1.03854  | 1.38612  | N | -2.45194 | -0.17818 | -0.28578 |
| H | 2.88685  | 1.45032  | 0.16771  | C | -3.31147 | 0.40224  | 0.76052  |
| H | 1.11345  | 2.27609  | -1.35987 | H | -2.89016 | 0.23226  | 1.75254  |
| H | 1.14403  | 3.17419  | 0.15220  | H | -3.35464 | 1.46815  | 0.55715  |
| H | -0.90778 | 2.15357  | 0.92655  | H | -4.31689 | -0.01083 | 0.70114  |
| H | -1.19837 | 2.44259  | -0.79216 | C | 2.71277  | -2.13220 | 0.03701  |
| O | 2.32380  | -1.28453 | 0.36175  | H | 3.16678  | -2.09192 | -0.95970 |
| N | -1.98261 | -2.37637 | -0.33495 | H | 3.35641  | -2.70499 | 0.70183  |
| N | -2.45678 | -1.36792 | -0.23535 | H | 1.73569  | -2.61739 | -0.03925 |
| N | -2.59835 | -0.13260 | -0.26244 |   |          |          |          |
| C | -3.36557 | 0.45298  | 0.85117  |   |          |          |          |
| H | -2.91184 | 0.20542  | 1.81200  |   |          |          |          |
| H | -3.34220 | 1.52806  | 0.69937  |   |          |          |          |
| H | -4.39940 | 0.11319  | 0.82285  |   |          |          |          |
| C | 3.72726  | -1.17637 | 0.25702  |   |          |          |          |
| H | 4.12005  | -0.34740 | 0.85250  |   |          |          |          |
| H | 4.15049  | -2.10721 | 0.63012  |   |          |          |          |
| H | 4.03267  | -1.03851 | -0.78666 |   |          |          |          |

Structure **12-ts-N3-C1-eq-III**

|   |          |          |          |
|---|----------|----------|----------|
| C | -0.85550 | 2.41518  | 0.18907  |
| C | -1.92110 | 1.43272  | -0.30809 |
| C | -1.74448 | 0.02929  | 0.29217  |
| C | -0.30279 | -0.37910 | 0.10866  |
| C | 0.55019  | 0.51637  | -0.00306 |
| C | 0.59577  | 1.97913  | -0.16652 |
| H | -1.95289 | 0.05901  | 1.37138  |
| H | -1.86777 | 1.33856  | -1.39660 |
| H | -2.91665 | 1.80622  | -0.05729 |
| H | -0.93101 | 2.50107  | 1.27651  |
| H | -1.03994 | 3.40719  | -0.22619 |
| H | 0.84863  | 2.24218  | -1.19668 |
| H | 1.30892  | 2.47907  | 0.49094  |
| O | -2.68675 | -0.82333 | -0.32391 |
| N | 1.61214  | -2.37065 | -0.20985 |
| N | 2.19101  | -1.41489 | -0.28269 |
| N | 2.41666  | -0.19787 | -0.40389 |
| C | 3.47672  | 0.35196  | 0.45865  |
| H | 4.44265  | -0.07689 | 0.19740  |
| H | 3.50042  | 1.41979  | 0.26318  |
| H | 3.25590  | 0.17386  | 1.51199  |
| C | -2.71849 | -2.10724 | 0.25877  |
| H | -2.99485 | -2.04776 | 1.31777  |
| H | -3.46714 | -2.68891 | -0.27555 |
| H | -1.74323 | -2.59523 | 0.17489  |

Structure **12-ts-N3-C1-eq-IV**

|   |          |          |          |
|---|----------|----------|----------|
| C | 0.88889  | 2.39502  | -0.28753 |
| C | 1.86183  | 1.42205  | 0.38735  |
| C | 1.76863  | 0.00560  | -0.19952 |
| C | 0.31250  | -0.39723 | -0.25453 |
| C | -0.53934 | 0.50663  | -0.26286 |
| C | -0.59968 | 1.97177  | -0.12851 |
| H | 2.15203  | 0.00756  | -1.23019 |
| H | 1.64363  | 1.35541  | 1.45740  |
| H | 2.88627  | 1.78675  | 0.28152  |
| H | 1.11858  | 2.44645  | -1.35530 |
| H | 1.02024  | 3.39825  | 0.12079  |
| H | -0.97969 | 2.26053  | 0.85525  |
| H | -1.22201 | 2.45555  | -0.88331 |
| O | 2.58726  | -0.83777 | 0.58318  |
| N | -1.66668 | -2.36616 | -0.23452 |
| N | -2.22926 | -1.39904 | -0.19617 |

Structure **12-ts-N3-C2-ax-I**

|   |          |          |          |
|---|----------|----------|----------|
| C | -2.18705 | 1.62786  | -0.15436 |
| C | -2.10982 | 0.35920  | 0.70135  |
| C | -0.87909 | -0.54451 | 0.37969  |
| C | 0.16903  | 0.44037  | 0.08580  |
| C | 0.27458  | 1.66554  | -0.05838 |
| C | -0.95073 | 2.53683  | 0.02213  |
| H | -0.65150 | -1.15477 | 1.26332  |
| H | -2.04899 | 0.63467  | 1.75826  |
| H | -3.01398 | -0.23968 | 0.57482  |
| H | -2.26430 | 1.34255  | -1.20732 |
| H | -3.09582 | 2.17946  | 0.09924  |
| H | -0.96759 | 3.02601  | 1.00060  |
| H | -0.94792 | 3.33441  | -0.72221 |
| O | -1.07743 | -1.40213 | -0.72786 |
| N | 1.89145  | -0.63138 | -0.23767 |
| N | 2.70673  | 0.30119  | -0.28201 |
| N | 3.13627  | 1.32834  | -0.40018 |
| C | 2.14593  | -1.69959 | 0.74003  |
| H | 1.32737  | -2.40526 | 0.62691  |
| H | 2.15939  | -1.30672 | 1.75789  |
| H | 3.08372  | -2.20676 | 0.51926  |
| C | -1.79521 | -2.57393 | -0.39785 |
| H | -2.80412 | -2.34835 | -0.04106 |
| H | -1.86737 | -3.17172 | -1.30378 |
| H | -1.26892 | -3.14841 | 0.37245  |

Structure **12-ts-N3-C2-ax-II**

|   |          |          |          |
|---|----------|----------|----------|
| C | 2.14722  | -1.60659 | -0.43728 |
| C | 2.16978  | -0.46676 | 0.58783  |
| C | 0.94106  | 0.48247  | 0.47479  |
| C | -0.15968 | -0.45112 | 0.20398  |
| C | -0.29715 | -1.64659 | -0.08652 |
| C | 0.91105  | -2.52142 | -0.28509 |
| H | 0.80866  | 1.03167  | 1.41495  |
| H | 2.18066  | -0.87989 | 1.60063  |
| H | 3.07656  | 0.13024  | 0.46967  |
| H | 2.14248  | -1.17509 | -1.44216 |
| H | 3.06187  | -2.19729 | -0.34340 |
| H | 1.01482  | -3.16958 | 0.59016  |
| H | 0.81217  | -3.18247 | -1.14729 |
| O | 1.06886  | 1.41166  | -0.59066 |
| N | -1.92101 | 0.58569  | 0.44911  |
| N | -2.71360 | -0.29827 | 0.08907  |
| N | -3.12009 | -1.31058 | -0.16545 |
| C | -2.01585 | 1.87826  | -0.25351 |
| H | -1.21658 | 2.49516  | 0.14463  |
| H | -2.97596 | 2.34946  | -0.04819 |
| H | -1.87148 | 1.75094  | -1.32651 |
| C | 1.80946  | 2.56049  | -0.23245 |
| H | 2.82632  | 2.30854  | 0.08220  |
| H | 1.86098  | 3.19760  | -1.11286 |
| H | 1.31458  | 3.10524  | 0.57932  |



Structure **12-ts-N3-C2-ax-III**

|   |          |          |          |
|---|----------|----------|----------|
| C | 2.59935  | -1.02387 | -0.01668 |
| C | 2.17059  | 0.08957  | 0.94746  |
| C | 0.89472  | 0.84510  | 0.49462  |
| C | 0.02255  | -0.25443 | 0.00958  |
| C | 0.20652  | -1.44123 | -0.27044 |
| C | 1.52894  | -2.13255 | -0.17589 |
| H | 0.46317  | 1.39087  | 1.34326  |
| H | 1.97529  | -0.33306 | 1.93674  |
| H | 2.96664  | 0.82950  | 1.05132  |
| H | 2.79517  | -0.58325 | -0.99759 |
| H | 3.53581  | -1.46423 | 0.33401  |
| H | 1.51984  | -2.79529 | 0.69394  |
| H | 1.74652  | -2.75826 | -1.04227 |
| O | 1.26689  | 1.76843  | -0.50660 |
| N | -2.04787 | 0.24670  | -0.11097 |
| N | -2.44255 | -0.91260 | -0.32174 |
| N | -2.33867 | -1.99698 | -0.60556 |
| C | -2.55029 | 0.88748  | 1.11482  |
| H | -2.02957 | 1.83760  | 1.19401  |
| H | -2.33757 | 0.27689  | 1.99399  |
| H | -3.62001 | 1.07746  | 1.03900  |
| C | 0.18850  | 2.55733  | -0.96408 |
| H | -0.27487 | 3.10175  | -0.13292 |
| H | 0.59276  | 3.27427  | -1.67569 |
| H | -0.56987 | 1.94205  | -1.45510 |

Structure **12-ts-N3-C2-ax-IV**

|   |          |          |          |
|---|----------|----------|----------|
| C | 2.55592  | -1.00697 | 0.01045  |
| C | 2.10380  | 0.10624  | 0.96633  |
| C | 0.88541  | 0.91211  | 0.44823  |
| C | -0.00586 | -0.14433 | -0.10433 |
| C | 0.18399  | -1.33345 | -0.35052 |
| C | 1.46473  | -2.08322 | -0.23963 |
| H | 0.41498  | 1.46720  | 1.26878  |
| H | 1.83244  | -0.32374 | 1.93410  |
| H | 2.91948  | 0.81304  | 1.13186  |
| H | 2.82570  | -0.55684 | -0.94811 |
| H | 3.45367  | -1.48401 | 0.41032  |
| H | 1.40209  | -2.78542 | 0.59581  |
| H | 1.69883  | -2.67005 | -1.12841 |
| O | 1.35364  | 1.82377  | -0.52278 |
| N | -2.20697 | 0.15050  | 0.05249  |
| N | -2.45485 | -1.00843 | -0.30997 |
| N | -2.16891 | -2.07890 | -0.53812 |
| C | -2.90838 | 1.22833  | -0.65889 |
| H | -2.49206 | 2.16018  | -0.28833 |
| H | -3.97392 | 1.20474  | -0.43224 |
| H | -2.75650 | 1.16108  | -1.73744 |
| C | 0.32680  | 2.60713  | -1.08564 |
| H | -0.22330 | 3.14853  | -0.30725 |
| H | 0.79463  | 3.32337  | -1.75789 |
| H | -0.37300 | 1.98352  | -1.65128 |

Structure **12-ts-N3-C2-eq-I**

|   |          |          |          |
|---|----------|----------|----------|
| C | 2.01138  | -1.83124 | 0.54945  |
| C | 2.19646  | -0.41128 | -0.00046 |
| C | 0.94834  | 0.49756  | 0.19863  |
| C | -0.16101 | -0.41780 | -0.10968 |
| C | -0.32749 | -1.64055 | -0.19226 |
| C | 0.83544  | -2.58968 | -0.11153 |
| H | 0.89730  | 0.83831  | 1.24354  |

|   |          |          |          |
|---|----------|----------|----------|
| H | 2.38589  | -0.44882 | -1.07778 |
| H | 3.06042  | 0.05679  | 0.47586  |
| H | 1.82641  | -1.77375 | 1.62664  |
| H | 2.93930  | -2.39329 | 0.41608  |
| H | 1.10194  | -2.90463 | -1.12421 |
| H | 0.60444  | -3.49836 | 0.44622  |
| O | 0.95073  | 1.62801  | -0.64687 |
| N | -1.86154 | 0.72475  | -0.22675 |
| N | -2.70186 | -0.18819 | -0.24726 |
| N | -3.15307 | -1.20570 | -0.37308 |
| C | -1.96931 | 1.69206  | 0.87838  |
| H | -1.10266 | 2.34014  | 0.78260  |
| H | -2.87615 | 2.28639  | 0.77884  |
| H | -1.95355 | 1.18655  | 1.84521  |
| C | 1.93434  | 2.57968  | -0.29231 |
| H | 1.75901  | 3.46350  | -0.90185 |
| H | 1.85082  | 2.84967  | 0.76668  |
| H | 2.94430  | 2.20875  | -0.48571 |

Structure **12-ts-N3-C2-eq-II**

|   |          |          |          |
|---|----------|----------|----------|
| C | -2.03843 | -1.91954 | -0.24259 |
| C | -2.20462 | -0.43777 | 0.11684  |
| C | -1.01657 | 0.45653  | -0.34493 |
| C | 0.15509  | -0.37606 | -0.03095 |
| C | 0.34092  | -1.57991 | 0.17208  |
| C | -0.77240 | -2.55930 | 0.38126  |
| H | -1.07850 | 0.64052  | -1.42651 |
| H | -2.27962 | -0.32284 | 1.20295  |
| H | -3.12946 | -0.05848 | -0.32316 |
| H | -1.97504 | -2.01722 | -1.33060 |
| H | -2.92691 | -2.47082 | 0.07543  |
| H | -0.91130 | -2.72030 | 1.45362  |
| H | -0.57737 | -3.53654 | -0.06226 |
| O | -0.98516 | 1.70139  | 0.32459  |
| N | 1.92505  | 0.67240  | -0.42093 |
| N | 2.69967  | -0.27541 | -0.20881 |
| N | 3.01663  | -1.34119 | -0.04658 |
| C | 2.15611  | 1.87720  | 0.40060  |
| H | 1.32960  | 2.54519  | 0.18694  |
| H | 2.15687  | 1.62834  | 1.46269  |
| H | 3.09854  | 2.34722  | 0.12271  |
| C | -2.06053 | 2.54770  | -0.03099 |
| H | -1.84873 | 3.52881  | 0.38923  |
| H | -2.14538 | 2.63340  | -1.11979 |
| H | -3.00982 | 2.18603  | 0.37277  |

Structure **12-ts-N3-C2-eq-III**

|   |          |          |          |
|---|----------|----------|----------|
| C | 2.50603  | -1.16165 | 0.62091  |
| C | 2.41471  | 0.29296  | 0.14712  |
| C | 1.00358  | 0.92799  | 0.25827  |
| C | 0.08864  | -0.17324 | -0.15900 |
| C | 0.29879  | -1.37754 | -0.28871 |
| C | 1.57800  | -2.12129 | -0.17561 |
| H | 0.78617  | 1.22069  | 1.29480  |
| H | 2.69431  | 0.35299  | -0.90865 |
| H | 3.11368  | 0.91697  | 0.70804  |
| H | 2.23270  | -1.21704 | 1.67857  |
| H | 3.54050  | -1.50286 | 0.53755  |
| H | 1.98401  | -2.31664 | -1.17109 |
| H | 1.48582  | -3.08207 | 0.33178  |
| O | 1.01503  | 2.07878  | -0.55350 |
| N | -2.13322 | 0.08861  | -0.18113 |
| N | -2.32225 | -1.12916 | -0.32917 |

|   |          |          |          |   |          |          |          |
|---|----------|----------|----------|---|----------|----------|----------|
| N | -1.98576 | -2.18616 | -0.55195 | H | -4.50087 | -1.84049 | -1.37982 |
| C | -2.63142 | 0.64641  | 1.08799  | H | -4.18844 | -2.23989 | 0.32585  |
| H | -2.22124 | 1.64939  | 1.16108  |   |          |          |          |
| H | -3.71910 | 0.70912  | 1.07930  |   |          |          |          |
| H | -2.29675 | 0.04985  | 1.93820  |   |          |          |          |
| C | -0.16166 | 2.85148  | -0.45010 |   |          |          |          |
| H | -0.01708 | 3.74100  | -1.05978 |   |          |          |          |
| H | -1.02787 | 2.29587  | -0.82023 |   |          |          |          |
| H | -0.33867 | 3.15509  | 0.58805  |   |          |          |          |

Structure **12-ts-N3-C2-eq-IV**

|   |          |          |          |
|---|----------|----------|----------|
| C | 2.28670  | -1.11245 | 0.30302  |
| C | 2.01456  | 0.24957  | -0.35152 |
| C | 0.75177  | 0.94851  | 0.20356  |
| C | -0.27564 | -0.13040 | 0.18526  |
| C | -0.10176 | -1.34606 | 0.22666  |
| C | 1.13890  | -2.14764 | 0.10687  |
| H | 0.93026  | 1.26050  | 1.24062  |
| H | 1.87498  | 0.13112  | -1.42987 |
| H | 2.86858  | 0.91304  | -0.19757 |
| H | 2.43290  | -0.96349 | 1.37677  |
| H | 3.21706  | -1.52585 | -0.09227 |
| H | 1.18889  | -2.60620 | -0.88354 |
| H | 1.21889  | -2.95094 | 0.83963  |
| O | 0.47105  | 2.08689  | -0.57636 |
| N | -2.51810 | 0.15019  | -0.19081 |
| N | -2.64970 | -1.07892 | -0.26832 |
| N | -2.28668 | -2.14616 | -0.14313 |
| C | -2.77338 | 0.87353  | -1.45109 |
| H | -2.42432 | 1.88980  | -1.30012 |
| H | -2.22770 | 0.41950  | -2.27928 |
| H | -3.84084 | 0.89158  | -1.66927 |
| C | -0.36324 | 2.99930  | 0.10981  |
| H | -0.65991 | 3.77115  | -0.59799 |
| H | -1.25482 | 2.49754  | 0.50040  |
| H | 0.17300  | 3.46019  | 0.94547  |

Structure **12-ts-Im-C1-ax-I**

|   |          |          |          |
|---|----------|----------|----------|
| C | -1.78990 | 1.88068  | -0.27700 |
| C | -2.52048 | 0.96701  | 0.71301  |
| C | -2.17345 | -0.52856 | 0.52383  |
| C | -0.66802 | -0.67933 | 0.37374  |
| C | -0.05906 | 0.35698  | 0.08762  |
| C | -0.23907 | 1.78357  | -0.15049 |
| H | -2.53711 | -1.09214 | 1.39128  |
| H | -2.25546 | 1.24678  | 1.73750  |
| H | -3.60015 | 1.10759  | 0.61482  |
| H | -2.06873 | 1.59309  | -1.29306 |
| H | -2.09581 | 2.91778  | -0.13038 |
| H | 0.13410  | 2.37517  | 0.68957  |
| H | 0.24693  | 2.13842  | -1.05989 |
| N | 2.12733  | 0.12655  | -0.03276 |
| C | 3.28323  | 0.82446  | -0.28829 |
| C | 2.48123  | -1.10962 | 0.20703  |
| C | 4.35102  | -0.02011 | -0.19705 |
| H | 3.27648  | 1.87676  | -0.51911 |
| H | 1.79473  | -1.90912 | 0.44102  |
| H | 5.40806  | 0.13396  | -0.32443 |
| H | 4.33758  | -2.10065 | 0.25982  |
| N | 3.82081  | -1.24638 | 0.11900  |
| O | -2.78744 | -1.06025 | -0.64311 |
| C | -4.12685 | -1.45338 | -0.43376 |
| H | -4.75701 | -0.61417 | -0.12346 |

Structure **12-ts-Im-C1-ax-II**

|   |          |          |          |
|---|----------|----------|----------|
| C | -1.77406 | 1.88207  | -0.25845 |
| C | -2.51774 | 0.96977  | 0.72306  |
| C | -2.18847 | -0.52859 | 0.52286  |
| C | -0.68551 | -0.69524 | 0.37244  |
| C | -0.06113 | 0.33397  | 0.09613  |
| C | -0.22489 | 1.76502  | -0.12968 |
| H | -2.55946 | -1.09428 | 1.38582  |
| H | -2.25147 | 1.23851  | 1.75020  |
| H | -3.59544 | 1.12415  | 0.62364  |
| H | -2.05423 | 1.60576  | -1.27729 |
| H | -2.06780 | 2.92167  | -0.10445 |
| H | 0.15275  | 2.34519  | 0.71644  |
| H | 0.26620  | 2.12310  | -1.03529 |
| N | 2.12021  | 0.07738  | -0.02098 |
| C | 2.52989  | -1.20259 | 0.23303  |
| C | 3.20025  | 0.77548  | -0.28221 |
| C | 3.88741  | -1.27557 | 0.12257  |
| H | 1.81049  | -1.96948 | 0.47437  |
| H | 3.23908  | 1.82466  | -0.52661 |
| H | 4.58090  | -2.08879 | 0.24306  |
| H | 5.24951  | 0.28978  | -0.36414 |
| N | 4.29872  | -0.00744 | -0.20612 |
| O | -2.80883 | -1.04340 | -0.64839 |
| C | -4.15157 | -1.42578 | -0.44085 |
| H | -4.77257 | -0.58418 | -0.11860 |
| H | -4.53160 | -1.79739 | -1.39073 |
| H | -4.21928 | -2.22097 | 0.30911  |

Structure **12-ts-Im-C1-ax-III**

|   |          |          |          |
|---|----------|----------|----------|
| C | -1.89106 | 1.95840  | -0.39523 |
| C | -2.64184 | 1.12855  | 0.65135  |
| C | -2.30558 | -0.37162 | 0.59631  |
| C | -0.78998 | -0.57026 | 0.45154  |
| C | -0.17467 | 0.44966  | 0.11517  |
| C | -0.34664 | 1.85760  | -0.22744 |
| H | -2.65725 | -0.85372 | 1.51730  |
| H | -2.38780 | 1.49086  | 1.65198  |
| H | -3.72044 | 1.24803  | 0.52394  |
| H | -2.15359 | 1.59758  | -1.39199 |
| H | -2.19139 | 3.00559  | -0.33241 |
| H | 0.01428  | 2.50733  | 0.57447  |
| H | 0.16247  | 2.14155  | -1.14915 |
| N | 1.98534  | 0.20192  | -0.01405 |
| C | 3.13184  | 0.89309  | -0.32362 |
| C | 2.35233  | -1.01311 | 0.30180  |
| C | 4.20808  | 0.06551  | -0.18776 |
| H | 3.11260  | 1.92845  | -0.62077 |
| H | 1.67487  | -1.80116 | 0.59362  |
| H | 5.26256  | 0.22060  | -0.33370 |
| H | 4.21840  | -1.98147 | 0.40129  |
| N | 3.69216  | -1.14274 | 0.21066  |
| O | -3.01228 | -0.93161 | -0.49327 |
| C | -2.88239 | -2.33327 | -0.57711 |
| H | -3.19063 | -2.80953 | 0.36063  |
| H | -3.53326 | -2.67096 | -1.38161 |
| H | -1.84972 | -2.61896 | -0.79354 |

Structure **12-ts-Im-C1-ax-IV**

|   |         |          |          |
|---|---------|----------|----------|
| C | 1.87468 | -1.95918 | -0.40187 |
|---|---------|----------|----------|

|   |          |          |          |
|---|----------|----------|----------|
| C | 2.63934  | -1.14007 | 0.64311  |
| C | 2.31864  | 0.36392  | 0.59359  |
| C | 0.80560  | 0.57762  | 0.45317  |
| C | 0.17565  | -0.43315 | 0.11829  |
| C | 0.33225  | -1.84287 | -0.22613 |
| H | 2.67797  | 0.83937  | 1.51508  |
| H | 2.38631  | -1.50221 | 1.64407  |
| H | 3.71595  | -1.27088 | 0.51004  |
| H | 2.13563  | -1.59772 | -1.39883 |
| H | 2.16481  | -3.00956 | -0.34387 |
| H | -0.03027 | -2.48995 | 0.57732  |
| H | -0.18325 | -2.12200 | -1.14594 |
| N | -1.97959 | -0.15543 | -0.00907 |
| C | -2.39453 | 1.10498  | 0.32111  |
| C | -3.05645 | -0.84393 | -0.30656 |
| C | -3.75276 | 1.17649  | 0.21932  |
| H | -1.67737 | 1.85895  | 0.60590  |
| H | -3.08989 | -1.87746 | -0.61097 |
| H | -4.45024 | 1.97732  | 0.38945  |
| H | -5.10837 | -0.36595 | -0.35154 |
| N | -4.15841 | -0.07270 | -0.18128 |
| O | 3.02810  | 0.91991  | -0.49646 |
| C | 2.91141  | 2.32316  | -0.57572 |
| H | 3.23142  | 2.79373  | 0.36094  |
| H | 3.55956  | 2.65647  | -1.38423 |
| H | 1.88003  | 2.61966  | -0.78339 |

Structure **12-ts-Im-C1-ax-V**

|   |          |          |          |
|---|----------|----------|----------|
| C | 1.94654  | 1.73558  | 0.41788  |
| C | 2.71576  | 0.90809  | -0.62198 |
| C | 2.22909  | -0.55730 | -0.83355 |
| C | 0.72998  | -0.66233 | -0.58899 |
| C | 0.15929  | 0.37813  | -0.24009 |
| C | 0.41278  | 1.75956  | 0.15439  |
| H | 2.42920  | -0.82009 | -1.87316 |
| H | 2.62706  | 1.41167  | -1.58954 |
| H | 3.78060  | 0.88947  | -0.37458 |
| H | 2.10514  | 1.32759  | 1.41746  |
| H | 2.32458  | 2.75975  | 0.41998  |
| H | 0.14992  | 2.45849  | -0.64404 |
| H | -0.12486 | 2.05605  | 1.05553  |
| N | -1.99789 | 0.19399  | -0.02322 |
| C | -3.11138 | 0.91016  | 0.34503  |
| C | -2.41134 | -1.00364 | -0.34822 |
| C | -4.21500 | 0.11531  | 0.23611  |
| H | -3.05161 | 1.93828  | 0.66125  |
| H | -1.76824 | -1.80363 | -0.68225 |
| H | -5.25809 | 0.29638  | 0.42709  |
| H | -4.30619 | -1.91784 | -0.39302 |
| N | -3.74949 | -1.09810 | -0.20606 |
| O | 2.98538  | -1.51308 | -0.10784 |
| C | 2.91608  | -1.38360 | 1.29486  |
| H | 1.87737  | -1.34016 | 1.63614  |
| H | 3.39805  | -2.26235 | 1.72012  |
| H | 3.44630  | -0.49080 | 1.64128  |

Structure **12-ts-Im-C1-ax-VI**

|   |         |          |          |
|---|---------|----------|----------|
| C | 1.92800 | 1.73771  | 0.42933  |
| C | 2.71118 | 0.92753  | -0.61358 |
| C | 2.24280 | -0.54223 | -0.83743 |
| C | 0.74555 | -0.66697 | -0.59629 |
| C | 0.15811 | 0.36235  | -0.24332 |
| C | 0.39519 | 1.74476  | 0.15994  |

|   |          |          |          |
|---|----------|----------|----------|
| H | 2.44780  | -0.79422 | -1.87877 |
| H | 2.61994  | 1.43709  | -1.57779 |
| H | 3.77522  | 0.92018  | -0.36216 |
| H | 2.08762  | 1.32378  | 1.42636  |
| H | 2.29363  | 2.76634  | 0.44093  |
| H | 0.12799  | 2.44548  | -0.63561 |
| H | -0.14797 | 2.03100  | 1.06128  |
| N | -1.99252 | 0.14412  | -0.02983 |
| C | -2.45145 | -1.10201 | -0.35579 |
| C | -3.04007 | 0.85810  | 0.31002  |
| C | -3.80664 | -1.13899 | -0.20733 |
| H | -1.76432 | -1.87129 | -0.67188 |
| H | -3.03653 | 1.88959  | 0.62293  |
| H | -4.53018 | -1.92004 | -0.35952 |
| H | -5.10096 | 0.43304  | 0.42184  |
| N | -4.16533 | 0.11674  | 0.21690  |
| O | 3.01034  | -1.49392 | -0.11796 |
| C | 2.93406  | -1.37817 | 1.28554  |
| H | 1.89357  | -1.35263 | 1.62313  |
| H | 3.42684  | -2.25381 | 1.70477  |
| H | 3.45029  | -0.48106 | 1.64200  |

Structure **12-ts-Im-C1-eq-I**

|   |          |          |          |
|---|----------|----------|----------|
| C | -1.66146 | 2.12322  | 0.16473  |
| C | -2.52562 | 0.96500  | -0.35306 |
| C | -2.19348 | -0.37258 | 0.34831  |
| C | -0.70145 | -0.56955 | 0.31754  |
| C | -0.02486 | 0.45768  | 0.21215  |
| C | -0.13018 | 1.89146  | -0.03283 |
| H | -2.51254 | -0.31559 | 1.39928  |
| H | -2.36596 | 0.82532  | -1.42693 |
| H | -3.57795 | 1.22007  | -0.20559 |
| H | -1.84996 | 2.25457  | 1.23363  |
| H | -1.94685 | 3.05248  | -0.33091 |
| H | 0.18491  | 2.13993  | -1.04895 |
| H | 0.44595  | 2.50309  | 0.66238  |
| N | 2.16164  | 0.11042  | 0.03112  |
| C | 3.35965  | 0.76216  | -0.13798 |
| C | 2.43849  | -1.16584 | 0.10782  |
| C | 4.37312  | -0.15120 | -0.16271 |
| H | 3.41888  | 1.83384  | -0.23114 |
| H | 1.70536  | -1.94663 | 0.24199  |
| H | 5.43797  | -0.04749 | -0.27499 |
| H | 4.23017  | -2.26828 | 0.02187  |
| N | 3.76746  | -1.37286 | -0.00469 |
| O | -2.85846 | -1.47346 | -0.25378 |
| C | -4.26006 | -1.43826 | -0.09272 |
| H | -4.72634 | -0.67301 | -0.71969 |
| H | -4.64319 | -2.41359 | -0.38773 |
| H | -4.52986 | -1.25079 | 0.95317  |

Structure **12-ts-Im-C1-eq-II**

|   |          |          |          |
|---|----------|----------|----------|
| C | -1.64797 | 2.12193  | 0.17139  |
| C | -2.52516 | 0.97450  | -0.34852 |
| C | -2.20411 | -0.36935 | 0.34652  |
| C | -0.71469 | -0.57989 | 0.30928  |
| C | -0.02695 | 0.43971  | 0.20803  |
| C | -0.11965 | 1.87558  | -0.03157 |
| H | -2.51837 | -0.31292 | 1.39898  |
| H | -2.37016 | 0.83759  | -1.42342 |
| H | -3.57447 | 1.23946  | -0.19678 |
| H | -1.83199 | 2.25060  | 1.24141  |
| H | -1.92567 | 3.05610  | -0.31945 |

|   |          |          |          |
|---|----------|----------|----------|
| H | 0.19408  | 2.12487  | -1.04798 |
| H | 0.46388  | 2.47989  | 0.66411  |
| N | 2.15511  | 0.06763  | 0.02435  |
| C | 2.47364  | -1.26045 | 0.10241  |
| C | 3.28489  | 0.71778  | -0.12651 |
| C | 3.82505  | -1.41199 | -0.00457 |
| H | 1.70078  | -2.00226 | 0.22970  |
| H | 3.39946  | 1.78544  | -0.22176 |
| H | 4.45968  | -2.28023 | 0.00835  |
| H | 5.29845  | 0.10756  | -0.25430 |
| N | 4.32693  | -0.14226 | -0.14995 |
| O | -2.88313 | -1.46072 | -0.25699 |
| C | -4.28330 | -1.41282 | -0.08783 |
| H | -4.67756 | -2.38269 | -0.38619 |
| H | -4.54543 | -1.22875 | 0.96063  |
| H | -4.74568 | -0.63951 | -0.70780 |

Structure **12-ts-Im-C1-eq-III**

|   |          |          |          |
|---|----------|----------|----------|
| C | -1.73054 | 2.26829  | 0.19846  |
| C | -2.61174 | 1.16615  | -0.40186 |
| C | -2.33874 | -0.20503 | 0.23212  |
| C | -0.84039 | -0.47572 | 0.22307  |
| C | -0.14294 | 0.54535  | 0.18364  |
| C | -0.20553 | 1.99450  | 0.01919  |
| H | -2.66547 | -0.19913 | 1.28191  |
| H | -2.42408 | 1.08004  | -1.47619 |
| H | -3.66634 | 1.42048  | -0.27099 |
| H | -1.94015 | 2.34872  | 1.26836  |
| H | -1.97515 | 3.23072  | -0.25319 |
| H | 0.13881  | 2.28971  | -0.97486 |
| H | 0.37665  | 2.54599  | 0.75847  |
| N | 2.02286  | 0.16924  | 0.03445  |
| C | 3.22787  | 0.82003  | -0.07818 |
| C | 2.28956  | -1.11125 | 0.05519  |
| C | 4.23567  | -0.09861 | -0.12596 |
| H | 3.29536  | 1.89451  | -0.11828 |
| H | 1.54831  | -1.89151 | 0.13665  |
| H | 5.30325  | 0.00258  | -0.21120 |
| H | 4.07600  | -2.22086 | -0.04638 |
| N | 3.61916  | -1.32204 | -0.03971 |
| O | -3.11115 | -1.15745 | -0.46986 |
| C | -3.07481 | -2.43460 | 0.12425  |
| H | -3.46427 | -2.40015 | 1.14831  |
| H | -3.70148 | -3.09142 | -0.47613 |
| H | -2.05211 | -2.82151 | 0.14916  |

Structure **12-ts-Im-C1-eq-IV**

|   |          |          |          |
|---|----------|----------|----------|
| C | -1.71377 | 2.27223  | 0.20431  |
| C | -2.60753 | 1.18107  | -0.39755 |
| C | -2.34765 | -0.19492 | 0.23205  |
| C | -0.85269 | -0.47969 | 0.21919  |
| C | -0.14348 | 0.53267  | 0.18298  |
| C | -0.19185 | 1.98297  | 0.02177  |
| H | -2.67203 | -0.18852 | 1.28259  |
| H | -2.42283 | 1.09605  | -1.47248 |
| H | -3.65913 | 1.44621  | -0.26393 |
| H | -1.92062 | 2.35165  | 1.27484  |
| H | -1.94918 | 3.23853  | -0.24404 |
| H | 0.15306  | 2.27726  | -0.97243 |
| H | 0.39640  | 2.52769  | 0.76145  |
| N | 2.01724  | 0.12708  | 0.03257  |
| C | 2.31876  | -1.20678 | 0.05986  |
| C | 3.15622  | 0.76949  | -0.07662 |

|   |          |          |          |
|---|----------|----------|----------|
| C | 3.66965  | -1.37005 | -0.03538 |
| H | 1.53510  | -1.94305 | 0.14592  |
| H | 3.28405  | 1.83872  | -0.12646 |
| H | 4.29404  | -2.24567 | -0.04972 |
| H | 5.16381  | 0.14050  | -0.20304 |
| N | 4.18812  | -0.10162 | -0.12169 |
| O | -3.13160 | -1.13707 | -0.47095 |
| C | -3.10287 | -2.41764 | 0.11648  |
| H | -3.73791 | -3.06609 | -0.48422 |
| H | -2.08330 | -2.81294 | 0.13430  |
| H | -3.48704 | -2.38523 | 1.14261  |

Structure **12-ts-Im-C1-eq-V**

|   |          |          |          |
|---|----------|----------|----------|
| C | 1.83787  | 2.15126  | -0.03908 |
| C | 2.69350  | 0.91357  | 0.26232  |
| C | 2.30669  | -0.27803 | -0.63916 |
| C | 0.80457  | -0.48769 | -0.54562 |
| C | 0.16248  | 0.52754  | -0.25166 |
| C | 0.31341  | 1.91011  | 0.19208  |
| H | 2.53977  | -0.02265 | -1.67587 |
| H | 2.55841  | 0.63166  | 1.31018  |
| H | 3.75130  | 1.14636  | 0.11495  |
| H | 1.98400  | 2.43905  | -1.08360 |
| H | 2.16154  | 2.99079  | 0.57794  |
| H | 0.04777  | 2.01383  | 1.24690  |
| H | -0.28157 | 2.62300  | -0.37994 |
| N | -2.00795 | 0.20330  | -0.02306 |
| C | -3.17642 | 0.85145  | 0.29785  |
| C | -2.33088 | -1.03286 | -0.30419 |
| C | -4.21953 | -0.02344 | 0.20567  |
| H | -3.19521 | 1.89306  | 0.57242  |
| H | -1.62968 | -1.79911 | -0.59807 |
| H | -5.27607 | 0.09032  | 0.37309  |
| H | -4.15630 | -2.08101 | -0.34099 |
| N | -3.66178 | -1.21747 | -0.17846 |
| O | 3.09661  | -1.42782 | -0.38882 |
| C | 2.85904  | -2.05122 | 0.85448  |
| H | 1.78877  | -2.22559 | 1.00083  |
| H | 3.37978  | -3.00710 | 0.83549  |
| H | 3.24377  | -1.45844 | 1.68928  |

Structure **12-ts-Im-C1-eq-VI**

|   |          |          |          |
|---|----------|----------|----------|
| C | 1.82011  | 2.15519  | -0.02873 |
| C | 2.68986  | 0.92675  | 0.27001  |
| C | 2.32105  | -0.26545 | -0.63869 |
| C | 0.82190  | -0.49266 | -0.55168 |
| C | 0.16482  | 0.51178  | -0.25618 |
| C | 0.29782  | 1.89402  | 0.19526  |
| H | 2.55511  | -0.00198 | -1.67318 |
| H | 2.55486  | 0.63814  | 1.31605  |
| H | 3.74517  | 1.17339  | 0.12730  |
| H | 1.96667  | 2.44966  | -1.07134 |
| H | 2.13101  | 2.99580  | 0.59344  |
| H | 0.02766  | 1.98934  | 1.24978  |
| H | -0.30282 | 2.60343  | -0.37549 |
| N | -2.00183 | 0.15627  | -0.03077 |
| C | -2.36820 | -1.13272 | -0.30582 |
| C | -3.10265 | 0.80684  | 0.26386  |
| C | -3.71975 | -1.25996 | -0.17239 |
| H | -1.62655 | -1.86623 | -0.58110 |
| H | -3.17658 | 1.84873  | 0.53046  |
| H | -4.38434 | -2.09602 | -0.29930 |
| H | -5.13072 | 0.24270  | 0.36924  |

|   |          |          |          |
|---|----------|----------|----------|
| N | -4.17222 | -0.01562 | 0.19093  |
| O | 3.12488  | -1.40600 | -0.39027 |
| C | 2.88080  | -2.04630 | 0.84318  |
| H | 3.42514  | -2.98894 | 0.82490  |
| H | 3.23625  | -1.45212 | 1.68994  |
| H | 1.81279  | -2.24785 | 0.96884  |

Structure **12-ts-Im-C2-ax-I**

|   |          |          |          |
|---|----------|----------|----------|
| C | 3.17177  | -0.78446 | -0.40877 |
| C | 2.67269  | 0.28218  | 0.57483  |
| C | 1.14670  | 0.60293  | 0.43593  |
| C | 0.61180  | -0.71509 | 0.12601  |
| C | 0.95769  | -1.86617 | -0.13590 |
| C | 2.44383  | -2.13703 | -0.24505 |
| H | 0.76815  | 0.99943  | 1.38507  |
| H | 2.84562  | -0.05532 | 1.60071  |
| H | 3.22881  | 1.21219  | 0.43933  |
| H | 3.01388  | -0.42545 | -1.42973 |
| H | 4.24860  | -0.92011 | -0.27742 |
| H | 2.76756  | -2.64232 | 0.66962  |
| H | 2.68670  | -2.80766 | -1.07070 |
| N | -1.59865 | -0.23935 | 0.14947  |
| C | -2.43982 | -1.31849 | 0.11338  |
| C | -2.35176 | 0.82664  | 0.02679  |
| C | -3.72773 | -0.89040 | -0.02873 |
| H | -2.05556 | -2.32389 | 0.18232  |
| H | -2.00684 | 1.84768  | 0.00193  |
| H | -4.66305 | -1.41700 | -0.09753 |
| H | -4.42980 | 1.11440  | -0.19324 |
| N | -3.65452 | 0.47946  | -0.08121 |
| O | 0.86074  | 1.52634  | -0.59746 |
| C | 1.03082  | 2.86938  | -0.19503 |
| H | 2.06127  | 3.07862  | 0.10731  |
| H | 0.78178  | 3.49530  | -1.04948 |
| H | 0.36374  | 3.11349  | 0.63917  |

Structure **12-ts-Im-C2-ax-II**

|   |          |          |          |
|---|----------|----------|----------|
| C | 3.14596  | -0.86725 | -0.33522 |
| C | 2.66055  | 0.23277  | 0.61776  |
| C | 1.16299  | 0.63153  | 0.40048  |
| C | 0.57234  | -0.66405 | 0.09565  |
| C | 0.86762  | -1.83549 | -0.14200 |
| C | 2.34285  | -2.17872 | -0.19313 |
| H | 0.76191  | 1.07299  | 1.32001  |
| H | 2.76649  | -0.10366 | 1.65308  |
| H | 3.27073  | 1.13098  | 0.50165  |
| H | 3.05072  | -0.50946 | -1.36442 |
| H | 4.20766  | -1.05721 | -0.15667 |
| H | 2.60534  | -2.69398 | 0.73555  |
| H | 2.58216  | -2.86669 | -1.00546 |
| N | -1.61636 | -0.13382 | 0.08849  |
| C | -2.48023 | 0.93020  | 0.17996  |
| C | -2.35613 | -1.20060 | -0.07013 |
| C | -3.76561 | 0.48369  | 0.07367  |
| H | -2.12797 | 1.94016  | 0.30944  |
| H | -1.97579 | -2.20483 | -0.17896 |
| H | -4.71300 | 0.99301  | 0.09280  |
| H | -4.43485 | -1.52029 | -0.19667 |
| N | -3.66734 | -0.87614 | -0.08538 |
| O | 0.98215  | 1.53903  | -0.66887 |
| C | 1.19419  | 2.88269  | -0.28944 |
| H | 2.21251  | 3.04829  | 0.07529  |
| H | 1.03382  | 3.49567  | -1.17388 |

|   |         |         |         |
|---|---------|---------|---------|
| H | 0.48679 | 3.18291 | 0.49099 |
|---|---------|---------|---------|

Structure **12-ts-Im-C2-ax-III**

|   |          |          |          |
|---|----------|----------|----------|
| C | 3.19660  | 0.39427  | 0.35306  |
| C | 2.65683  | -0.55275 | -0.73061 |
| C | 1.09192  | -0.70013 | -0.80463 |
| C | 0.65675  | 0.59702  | -0.28839 |
| C | 1.08905  | 1.67325  | 0.12593  |
| C | 2.58742  | 1.81149  | 0.28294  |
| H | 0.80715  | -0.83743 | -1.84834 |
| H | 2.98426  | -0.19047 | -1.70863 |
| H | 3.06819  | -1.55702 | -0.60345 |
| H | 2.98407  | -0.01761 | 1.34257  |
| H | 4.28460  | 0.45149  | 0.25911  |
| H | 2.97275  | 2.35595  | -0.58409 |
| H | 2.86949  | 2.39241  | 1.16250  |
| N | -1.55438 | 0.26046  | -0.24715 |
| C | -2.30736 | 1.35902  | 0.06698  |
| C | -2.37909 | -0.75759 | -0.30716 |
| C | -3.61615 | 0.99422  | 0.19312  |
| H | -1.84824 | 2.32766  | 0.18739  |
| H | -2.10560 | -1.77774 | -0.52167 |
| H | -4.50473 | 1.55339  | 0.42699  |
| H | -4.46097 | -0.94898 | -0.02959 |
| N | -3.64479 | -0.35704 | -0.04900 |
| O | 0.56944  | -1.84097 | -0.15726 |
| C | 0.73219  | -1.86277 | 1.24655  |
| H | 0.32015  | -0.95902 | 1.70373  |
| H | 0.19013  | -2.73351 | 1.61114  |
| H | 1.78604  | -1.96093 | 1.52373  |

Structure **12-ts-Im-C2-ax-IV**

|   |          |          |          |
|---|----------|----------|----------|
| C | 3.18944  | 0.44877  | 0.33846  |
| C | 2.66499  | -0.52158 | -0.73193 |
| C | 1.10399  | -0.71550 | -0.78630 |
| C | 0.63866  | 0.57335  | -0.27592 |
| C | 1.04184  | 1.66566  | 0.12756  |
| C | 2.53829  | 1.84678  | 0.26574  |
| H | 0.81149  | -0.86892 | -1.82564 |
| H | 2.97068  | -0.15765 | -1.71636 |
| H | 3.10616  | -1.51269 | -0.60188 |
| H | 3.00116  | 0.03798  | 1.33330  |
| H | 4.27408  | 0.53743  | 0.23092  |
| H | 2.89745  | 2.39579  | -0.60962 |
| H | 2.81356  | 2.44212  | 1.13779  |
| N | -1.56188 | 0.18874  | -0.22152 |
| C | -2.46763 | -0.83769 | -0.33387 |
| C | -2.24658 | 1.26071  | 0.08335  |
| C | -3.72382 | -0.36168 | -0.09120 |
| H | -2.15444 | -1.84042 | -0.57176 |
| H | -1.82262 | 2.23915  | 0.24993  |
| H | -4.68852 | -0.83767 | -0.07865 |
| H | -4.29678 | 1.63163  | 0.39637  |
| N | -3.56397 | 0.97633  | 0.17259  |
| O | 0.62312  | -1.86466 | -0.12423 |
| C | 0.78856  | -1.86503 | 1.27897  |
| H | 0.34130  | -0.97378 | 1.72751  |
| H | 0.28181  | -2.75256 | 1.65340  |
| H | 1.84584  | -1.91821 | 1.55577  |

Structure **12-ts-Im-C2-eq-I**

|   |         |          |         |
|---|---------|----------|---------|
| C | 3.18638 | -0.99813 | 0.40203 |
| C | 2.68726 | 0.39788  | 0.00453 |

|   |          |          |          |   |          |          |          |
|---|----------|----------|----------|---|----------|----------|----------|
| C | 1.16146  | 0.62036  | 0.26190  | C | -3.29217 | -0.68166 | -0.49296 |
| C | 0.62063  | -0.67649 | -0.13086 | C | -2.66893 | 0.71240  | -0.33847 |
| C | 0.97874  | -1.83780 | -0.31547 | C | -1.13483 | 0.73871  | -0.62165 |
| C | 2.45969  | -2.14137 | -0.34524 | C | -0.70447 | -0.50877 | 0.02019  |
| H | 0.97622  | 0.81790  | 1.32663  | C | -1.16946 | -1.57902 | 0.41542  |
| H | 2.84556  | 0.55987  | -1.06627 | C | -2.67545 | -1.72633 | 0.46618  |
| H | 3.25412  | 1.15861  | 0.54548  | H | -0.95528 | 0.69552  | -1.69842 |
| H | 3.03510  | -1.13613 | 1.47710  | H | -2.83104 | 1.06286  | 0.68390  |
| H | 4.26327  | -1.05912 | 0.22278  | H | -3.14853 | 1.42494  | -1.01253 |
| H | 2.78649  | -2.18825 | -1.38757 | H | -3.14528 | -1.02588 | -1.52146 |
| H | 2.70398  | -3.10621 | 0.10189  | H | -4.37142 | -0.61546 | -0.33051 |
| N | -1.58678 | -0.24343 | 0.04122  | H | -3.00930 | -1.54889 | 1.49243  |
| C | -2.37985 | 0.79979  | -0.00147 | H | -3.00867 | -2.73110 | 0.20134  |
| C | -2.39362 | -1.34743 | 0.09480  | N | 1.49556  | -0.29148 | -0.14240 |
| H | -2.06508 | 1.82867  | -0.06076 | C | 2.36391  | 0.65776  | -0.39960 |
| C | -3.70181 | -0.95882 | 0.08853  | C | 2.21565  | -1.41222 | 0.16877  |
| H | -1.97249 | -2.34004 | 0.12529  | H | 2.12514  | 1.67278  | -0.67279 |
| H | -4.47719 | 1.02388  | -0.00160 | C | 3.54890  | -1.13154 | 0.09406  |
| H | -4.62284 | -1.51351 | 0.11959  | H | 1.71855  | -2.33430 | 0.42643  |
| N | -3.67567 | 0.41270  | 0.02812  | H | 4.47106  | 0.72164  | -0.41168 |
| O | 0.63354  | 1.68578  | -0.49750 | H | 4.42580  | -1.73160 | 0.26091  |
| C | 1.09054  | 2.94947  | -0.06140 | N | 3.62575  | 0.19035  | -0.26913 |
| H | 2.15277  | 3.09348  | -0.27752 | O | -0.50758 | 1.93362  | -0.20749 |
| H | 0.51661  | 3.70147  | -0.59939 | C | -0.36928 | 2.09629  | 1.19173  |
| H | 0.92670  | 3.07335  | 1.01500  | H | 0.14672  | 1.24053  | 1.63401  |
|   |          |          |          | H | 0.22681  | 2.99514  | 1.33987  |
|   |          |          |          | H | -1.33432 | 2.23080  | 1.68645  |

Structure **12-ts-Im-C2-eq-II**

|   |          |          |          |
|---|----------|----------|----------|
| C | 3.13232  | -1.06544 | 0.45401  |
| C | 2.69976  | 0.34636  | 0.03603  |
| C | 1.17629  | 0.63163  | 0.24457  |
| C | 0.59678  | -0.64913 | -0.14559 |
| C | 0.91233  | -1.82587 | -0.31568 |
| C | 2.38257  | -2.18230 | -0.30918 |
| H | 0.96633  | 0.85339  | 1.29991  |
| H | 2.89603  | 0.49563  | -1.03031 |
| H | 3.27927  | 1.08814  | 0.58960  |
| H | 2.94560  | -1.19209 | 1.52487  |
| H | 4.21058  | -1.16953 | 0.30537  |
| H | 2.73268  | -2.24299 | -1.34321 |
| H | 2.58031  | -3.15469 | 0.14464  |
| N | -1.59392 | -0.16317 | 0.00787  |
| C | -2.46004 | 0.89829  | 0.10271  |
| C | -2.32982 | -1.24390 | -0.02182 |
| H | -2.10509 | 1.91473  | 0.13583  |
| H | -1.94763 | -2.25034 | -0.09954 |
| H | -4.69341 | 0.93768  | 0.19636  |
| H | -4.40780 | -1.58695 | 0.04224  |
| N | -3.64212 | -0.93111 | 0.05085  |
| C | -3.74407 | 0.43571  | 0.13162  |
| O | 0.71606  | 1.70304  | -0.54807 |
| C | 1.19296  | 2.95693  | -0.10613 |
| H | 0.67323  | 3.71912  | -0.68321 |
| H | 0.97788  | 3.10265  | 0.95845  |
| H | 2.26943  | 3.06236  | -0.26829 |

Structure **12-ts-Im-C2-eq-III**Structure **12-ts-Im-C2-eq-IV**

|   |          |          |          |
|---|----------|----------|----------|
| C | -3.26343 | -0.74977 | -0.49249 |
| C | -2.68745 | 0.66557  | -0.35219 |
| C | -1.15244 | 0.74103  | -0.62301 |
| C | -0.68568 | -0.48814 | 0.02763  |
| C | -1.11434 | -1.57102 | 0.43317  |
| C | -2.61673 | -1.76159 | 0.48120  |
| H | -0.96217 | 0.70001  | -1.69805 |
| H | -2.86944 | 1.02621  | 0.66333  |
| H | -3.18379 | 1.35280  | -1.04015 |
| H | -3.10068 | -1.10102 | -1.51622 |
| H | -4.34501 | -0.71759 | -0.33526 |
| H | -2.95845 | -1.58096 | 1.50435  |
| H | -2.91824 | -2.77964 | 0.22926  |
| N | 1.50048  | -0.22197 | -0.13977 |
| C | 2.43893  | 0.74296  | -0.41532 |
| C | 2.15831  | -1.31317 | 0.15559  |
| H | 2.15228  | 1.74593  | -0.68446 |
| H | 1.70406  | -2.25395 | 0.42657  |
| H | 4.67095  | 0.62705  | -0.40644 |
| H | 4.20830  | -1.78386 | 0.26390  |
| N | 3.48958  | -1.10050 | 0.08211  |
| C | 3.68770  | 0.20869  | -0.28159 |
| O | -0.57440 | 1.95917  | -0.20649 |
| C | -0.40753 | 2.10725  | 1.19088  |
| H | 0.08481  | 3.06622  | 1.34188  |
| H | -1.36359 | 2.11637  | 1.72058  |
| H | 0.21880  | 1.30791  | 1.59427  |

## **<sup>1</sup>H NMR Spectra:**

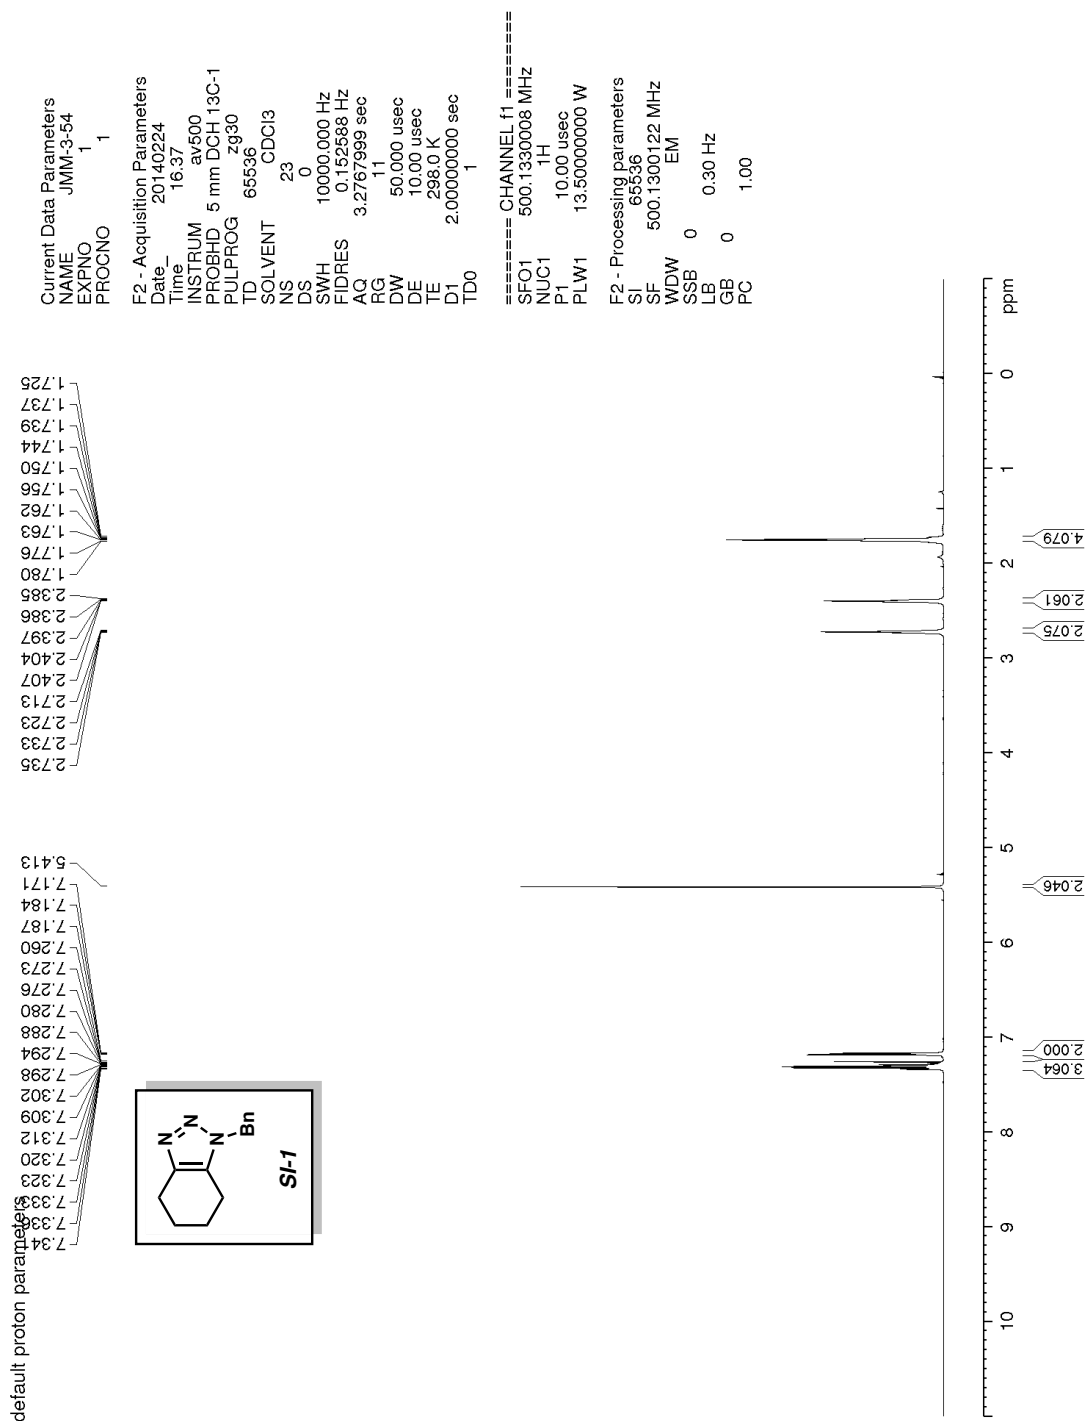



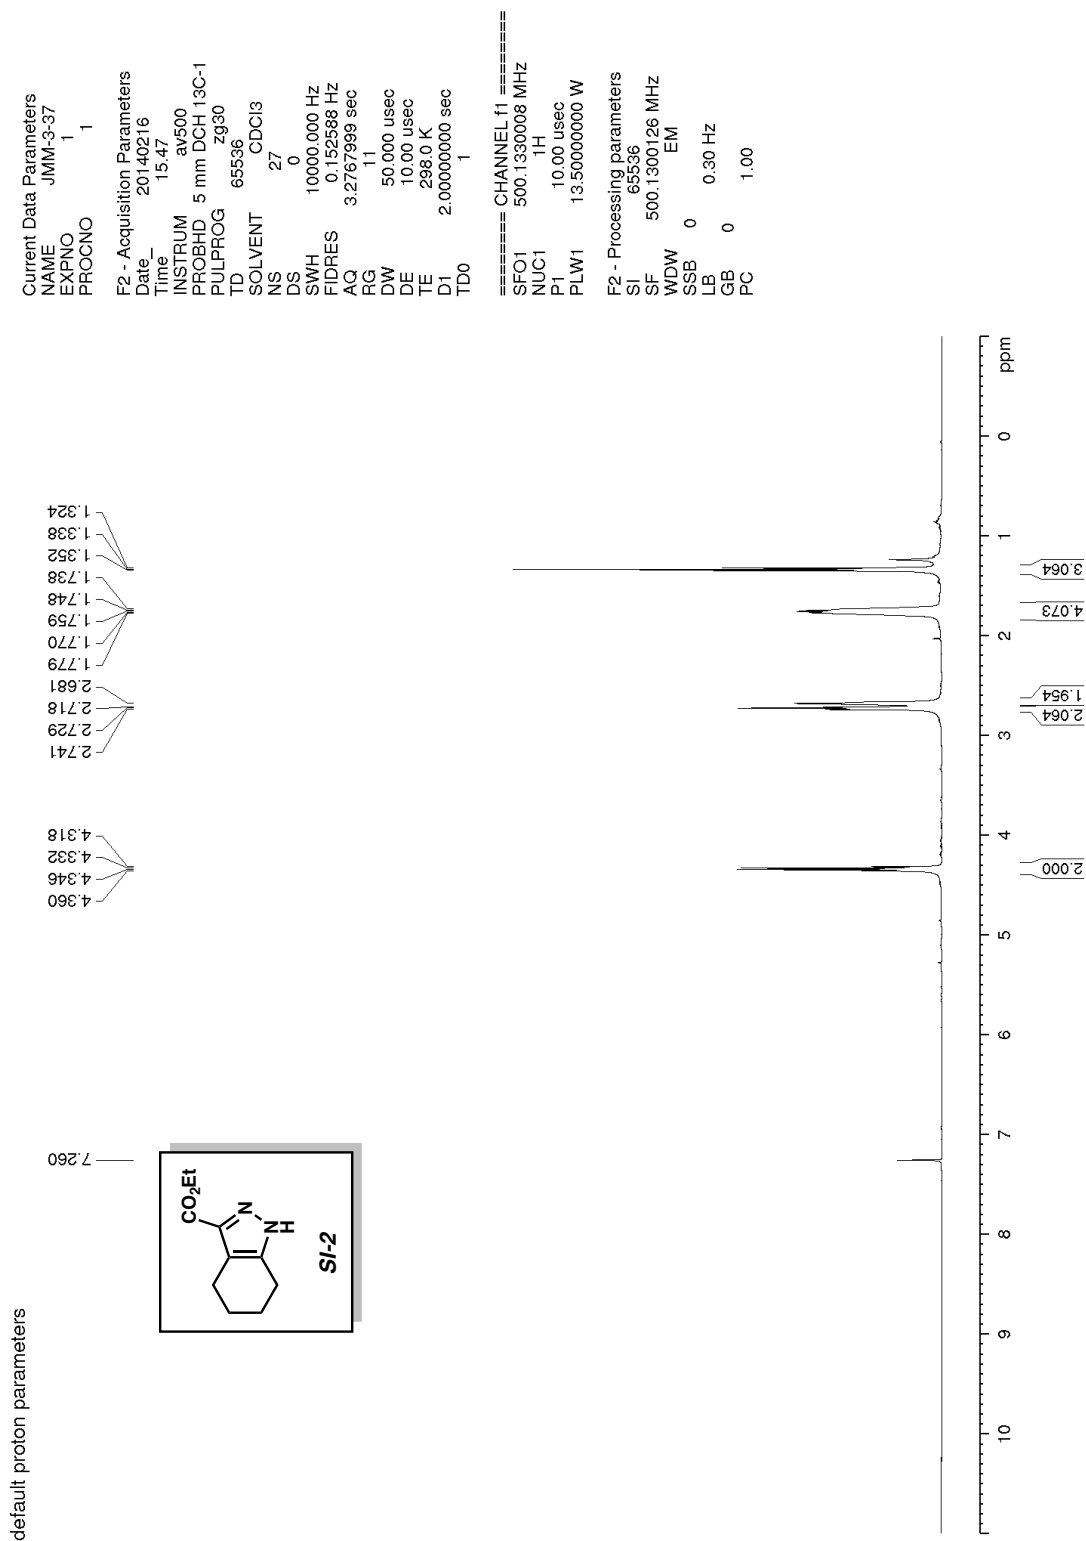

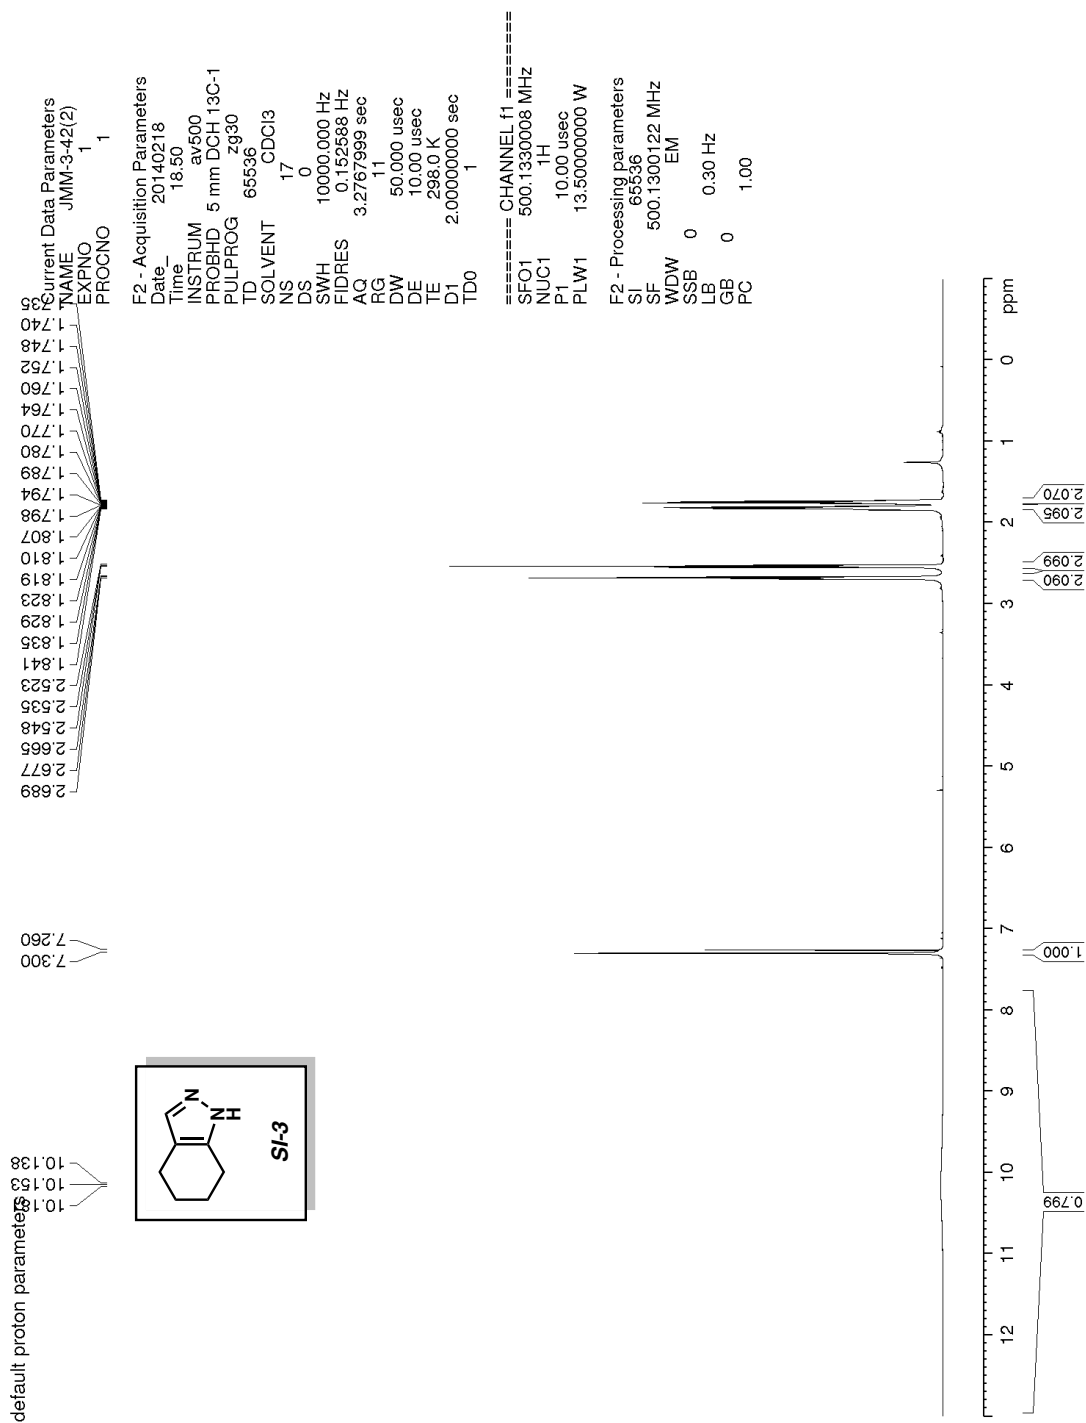

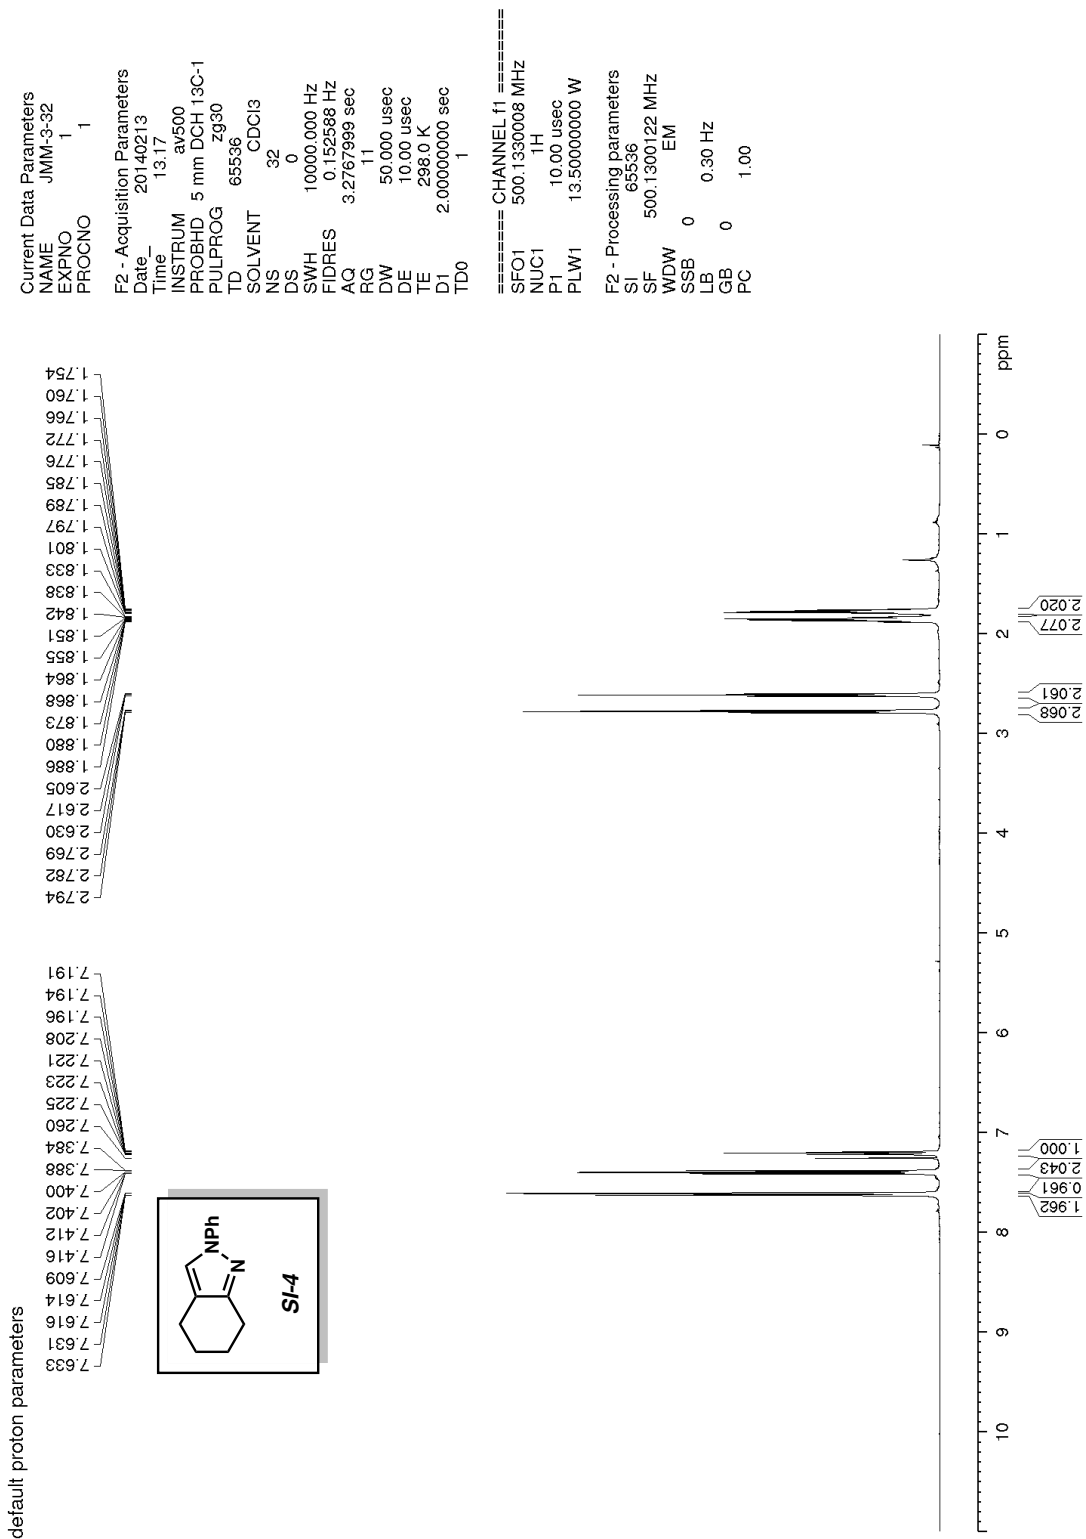

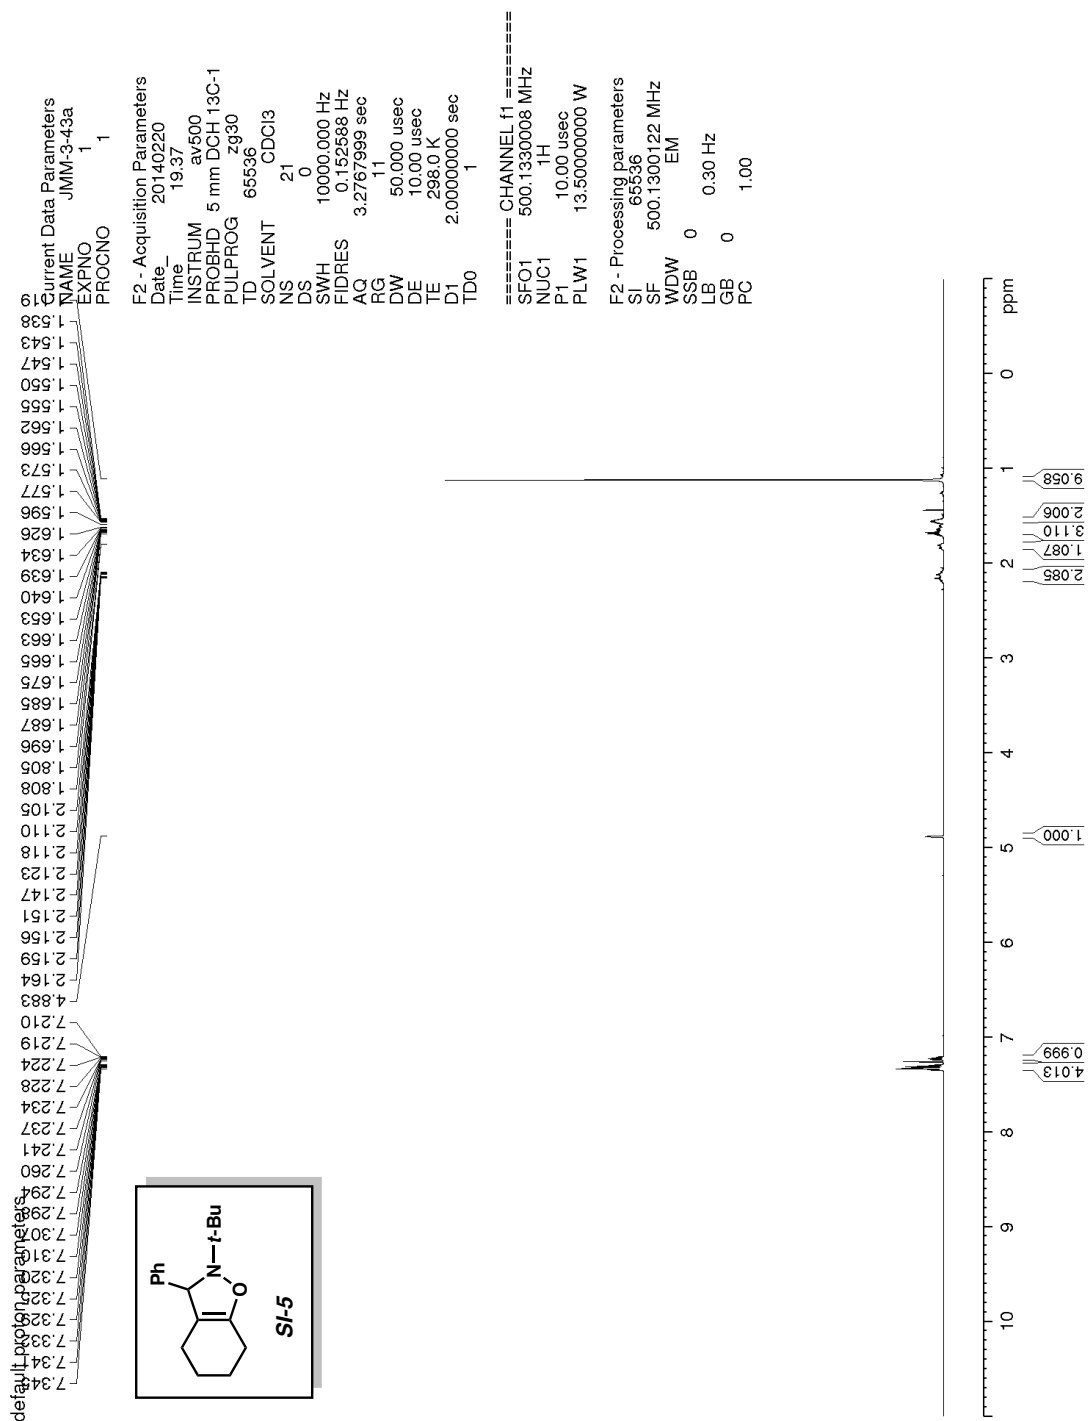

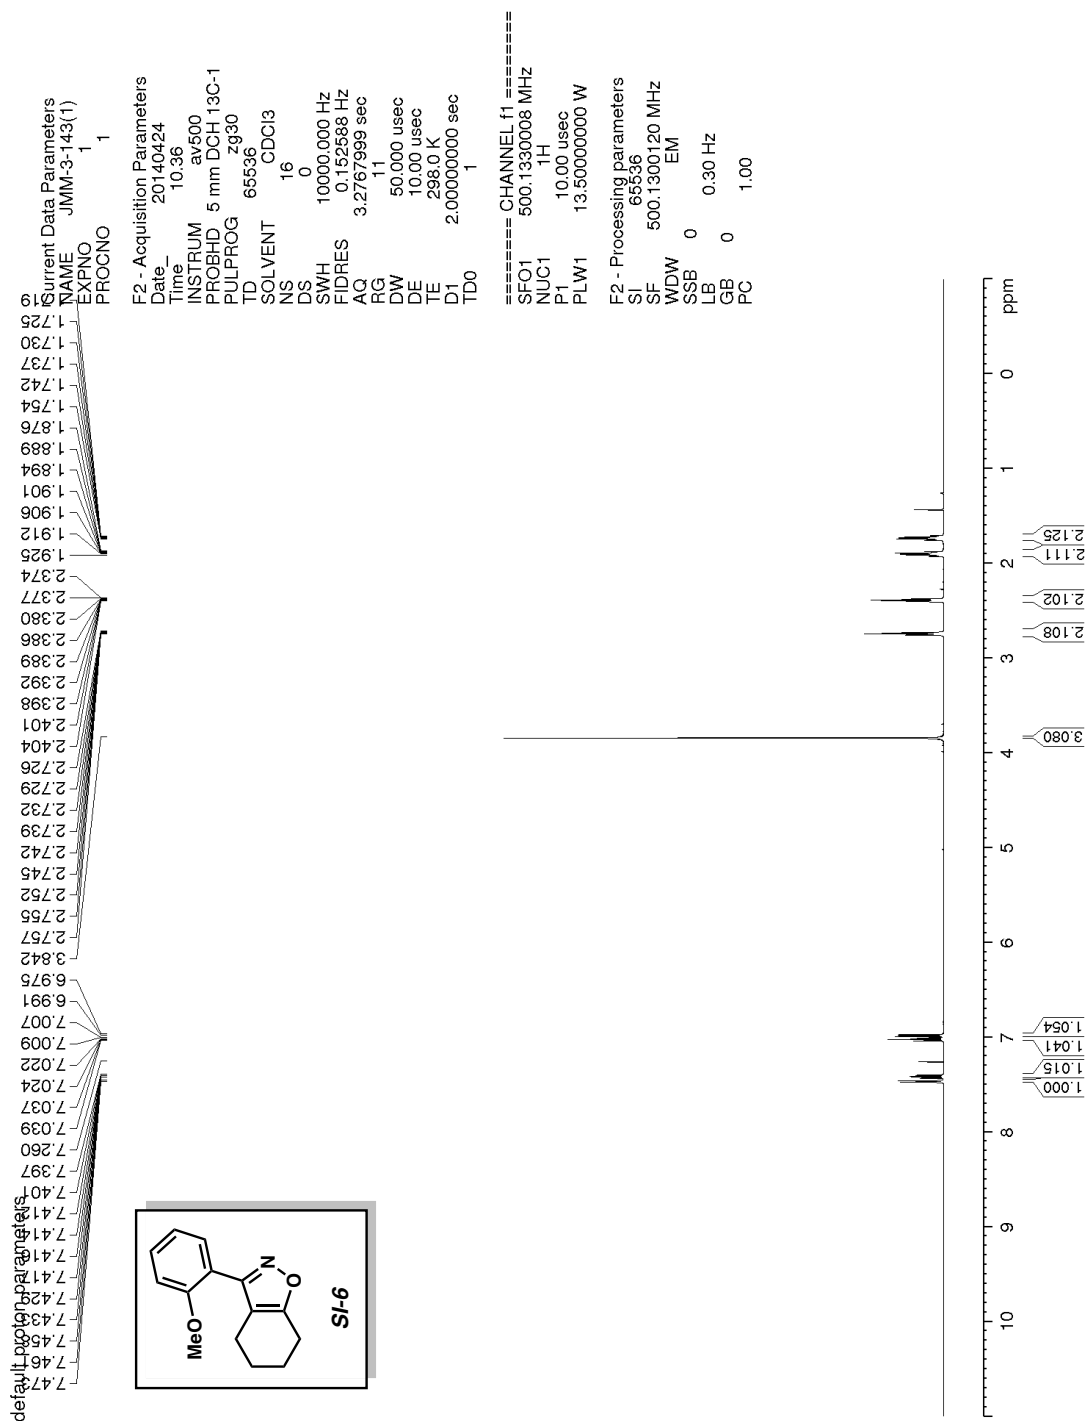

default proton parameters

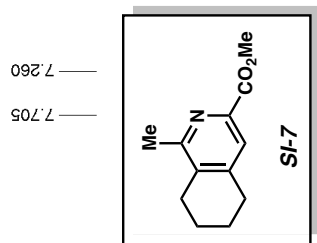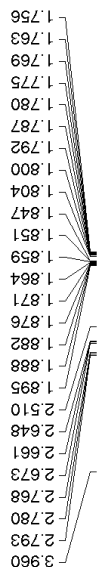

```

Current Data Parameters
NAME      JMMI-3-39
EXPNO     1
PROCNO    1

F2 - Acquisition Parameters
Date_     20140218
Time      9:37
INSTRUM   av500
PROBHD    5 mm DCH 13C-1
PULPROG   zg30
TD         65536
SOLVENT   CDCl3
NS         32
DS         0
SWH        10000.000 Hz
FIDRES     0.152588 Hz
AQ         3.2767989 sec
RG         11
DE         50.000 usec
TE         298.0 K
D1         2.00000000 sec
TD0        1

===== CHANNEL f1 =====
SFO1      500.130008 MHz
NUC1      1H
P1         10.00 usec
PLW1      13.50000000 W

F2 - Processing parameters
SI         65536
SF         500.1300122 MHz
WDW        EM
SSB        0
LB         0.30 Hz
GB         0
PC         1.00
    
```

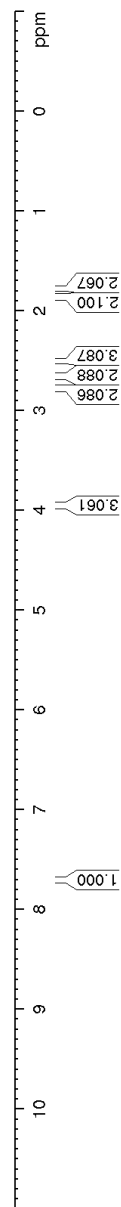

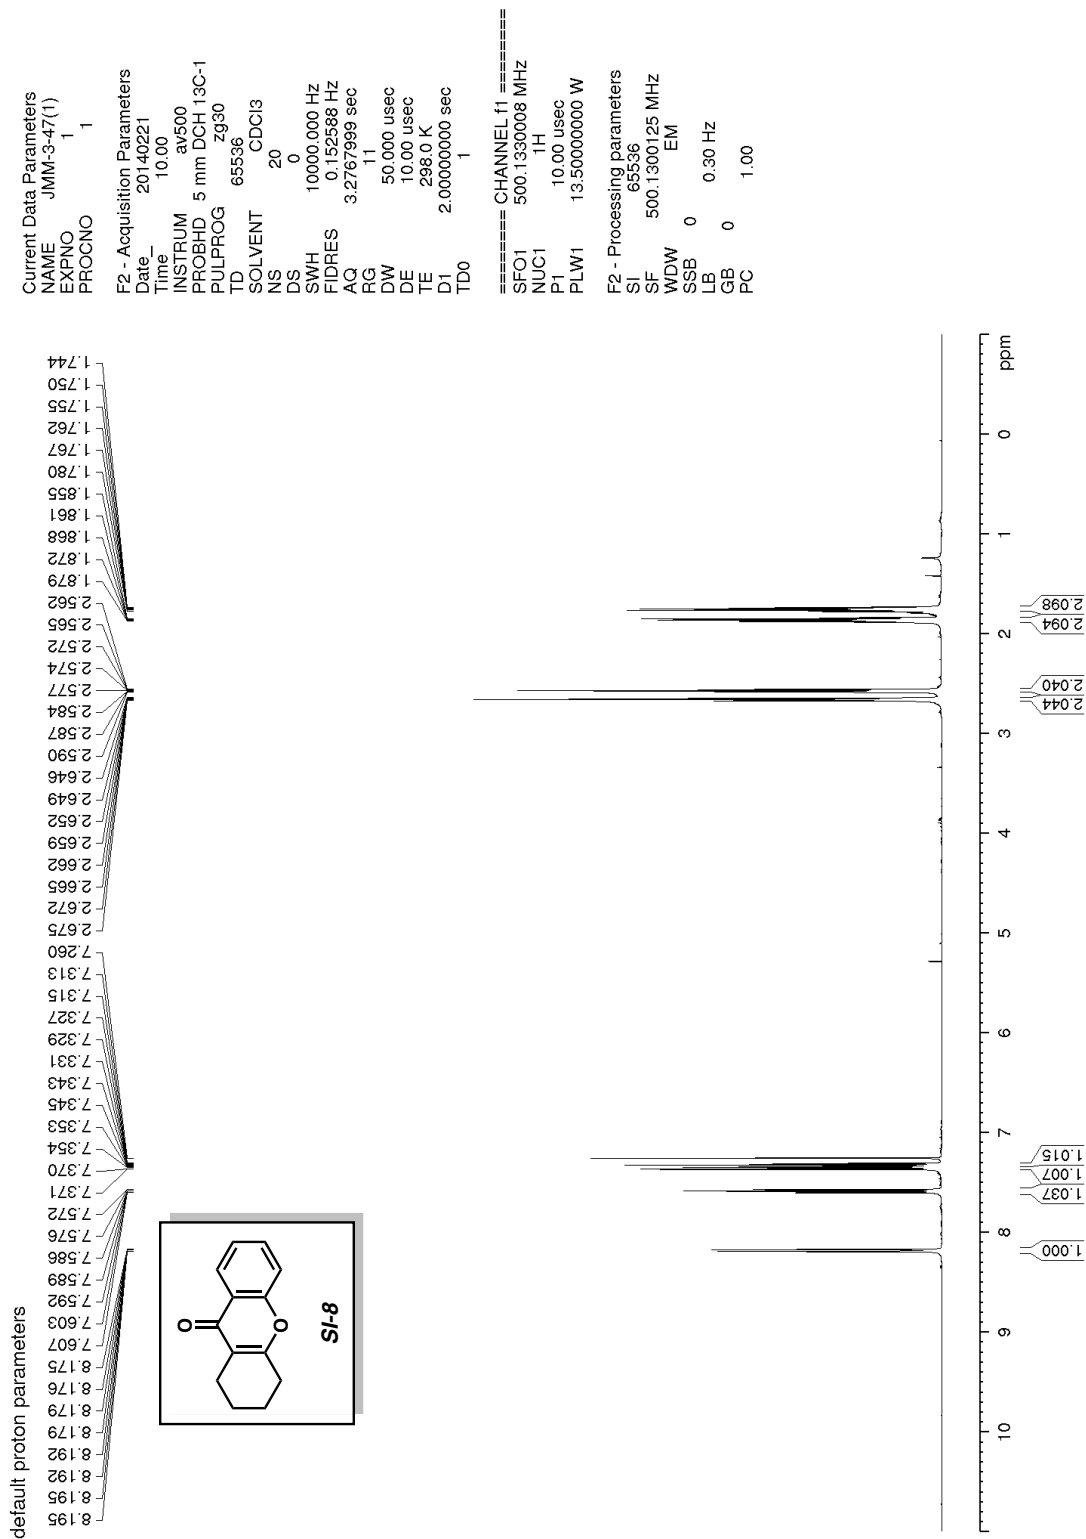

Current Data Parameters  
 NAME JMM-3-47(2)  
 EXPNO 1  
 PROCNO 1

F2 - Acquisition Parameters  
 Date\_ 20140221  
 Time 10.09  
 INSTRUM av500  
 PROBHD 5 mm DCH 13C-1  
 PULPROG zg30  
 TD 65536  
 SOLVENT CDCl3  
 NS 19  
 DS 0  
 SWH 10000.000 Hz  
 FIDRES 0.152568 Hz  
 AQ 3.2767999 sec  
 RG 22.82  
 DW 50.000 usec  
 DE 10.00 usec  
 TE 298.0 K  
 D1 2.0000000 sec  
 TD0 1

===== CHANNEL f1 =====  
 SFO1 500.130008 MHz  
 NUC1 1H  
 P1 10.00 usec  
 PLW1 13.5000000 W

F2 - Processing parameters  
 SI 65536  
 SF 500.1300125 MHz  
 WDW EM  
 SSB 0  
 LB 0.30 Hz  
 GB 0  
 PC 1.00

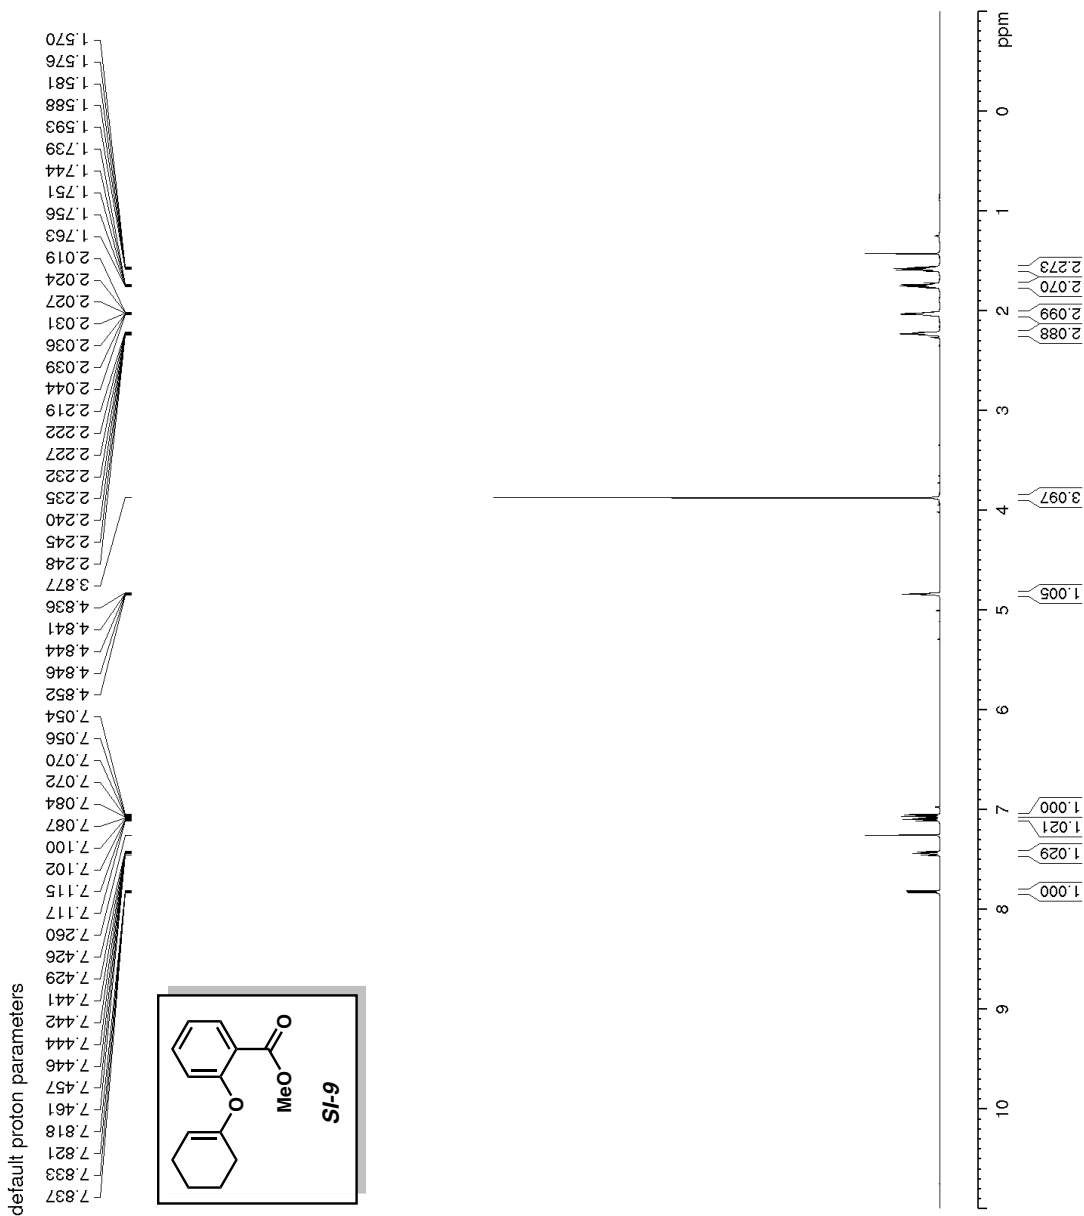



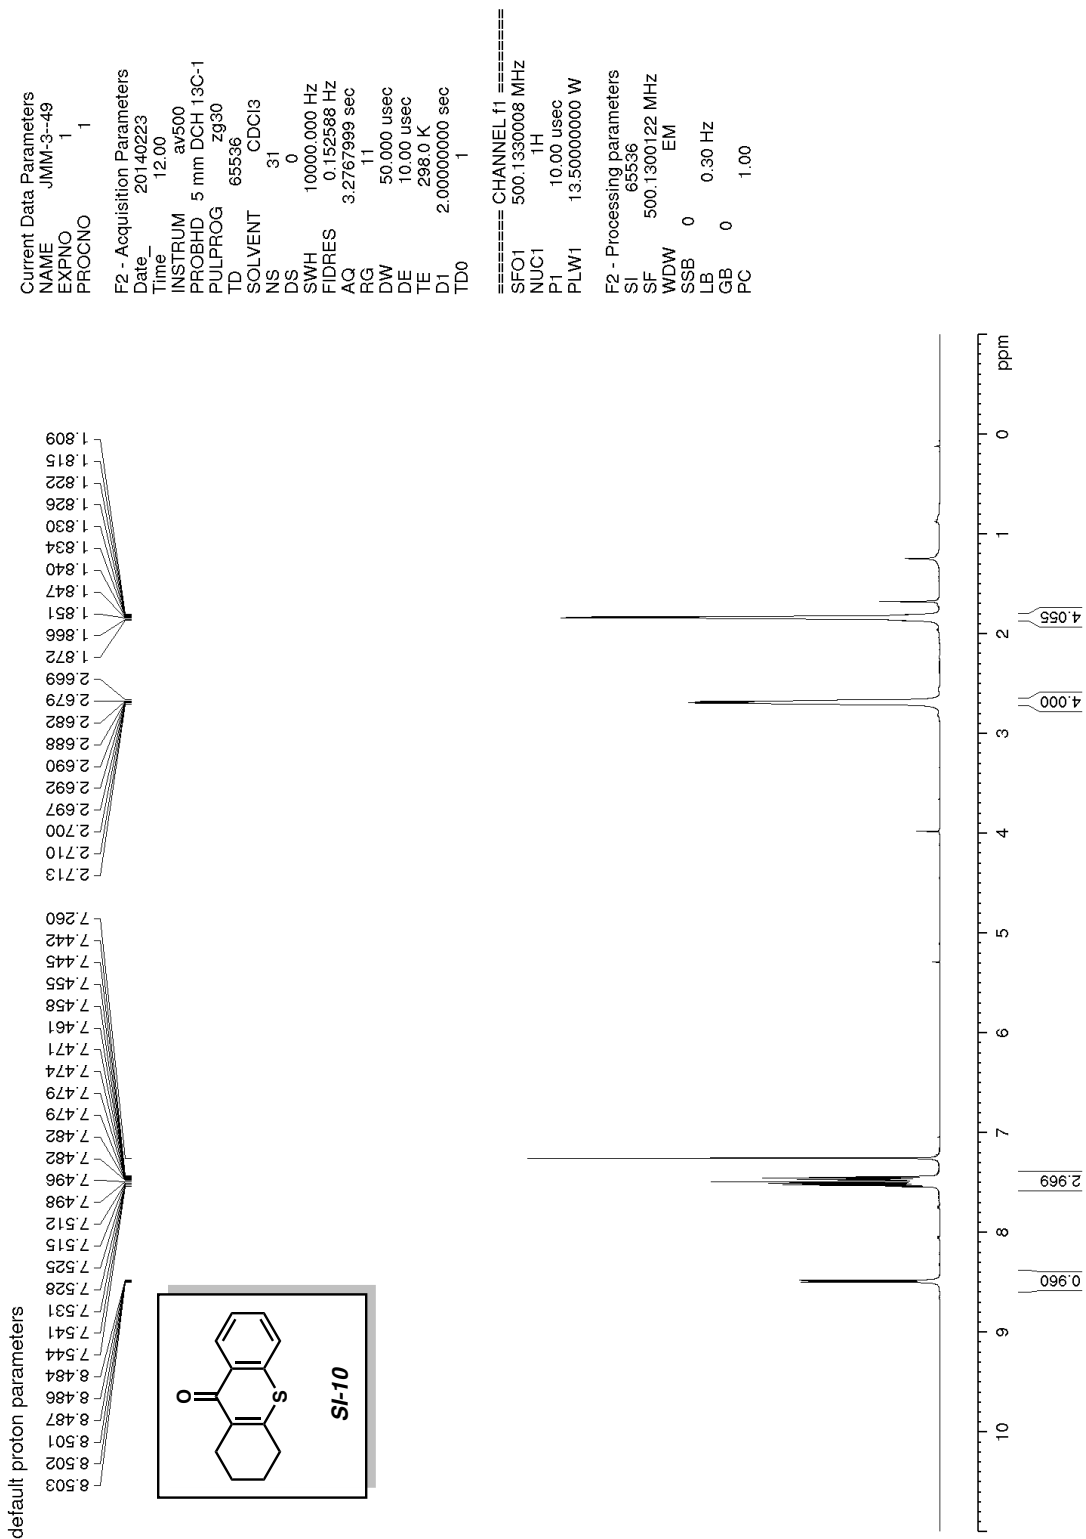

Current Data Parameters  
 NAME JMM-3-49-2  
 EXPNO 1  
 PROCNO 1

F2 - Acquisition Parameters  
 Date\_ 20140222  
 Time 19.03  
 INSTRUM av500  
 PROBHD 5 mm DCH 13C-1  
 PULPROG zg30  
 TD 65536  
 SOLVENT CDCl3  
 NS 20  
 DS 0  
 SWH 10000.000 Hz  
 FIDRES 0.152568 Hz  
 AQ 3.2767989 sec  
 RG 11  
 DW 50.000 usec  
 DE 10.00 usec  
 TE 298.0 K  
 D1 2.0000000 sec  
 TD0 1

===== CHANNEL f1 =====  
 SFO1 500.130008 MHz  
 NUC1 1H  
 P1 10.00 usec  
 PLW1 13.50000000 W

F2 - Processing parameters  
 SI 65536  
 SF 500.1300122 MHz  
 WDW EM  
 SSB 0  
 LB 0.30 Hz  
 GB 0  
 PC 1.00

default proton parameters

7.938  
7.936  
7.923  
7.920  
7.406  
7.403  
7.391  
7.390  
7.388  
7.387  
7.375  
7.372  
7.260  
7.253  
7.251  
7.237  
7.235  
7.158  
7.155  
7.142  
7.141  
7.128  
7.125  
6.389  
6.385  
6.381  
6.378  
6.374  
3.911  
2.264  
2.257  
2.252  
2.245  
2.239  
2.232  
2.182  
2.174  
2.170  
2.166  
2.162  
2.158  
2.154  
1.739  
1.732  
1.728  
1.720  
1.716  
1.704  
1.678  
1.666  
1.662  
1.655  
1.651  
1.644

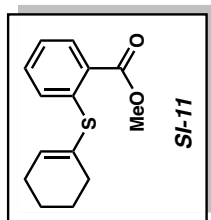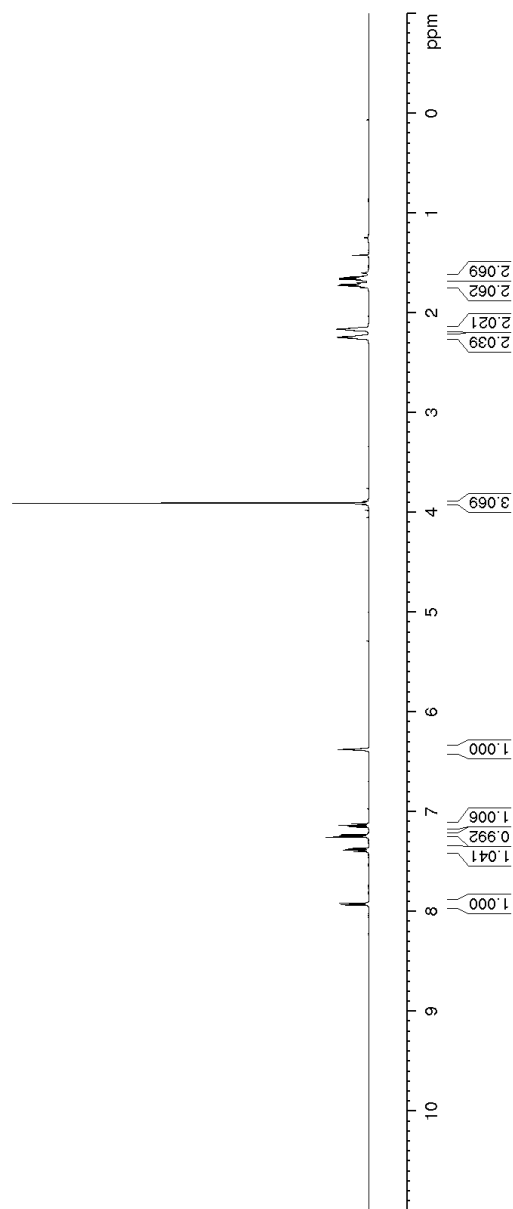



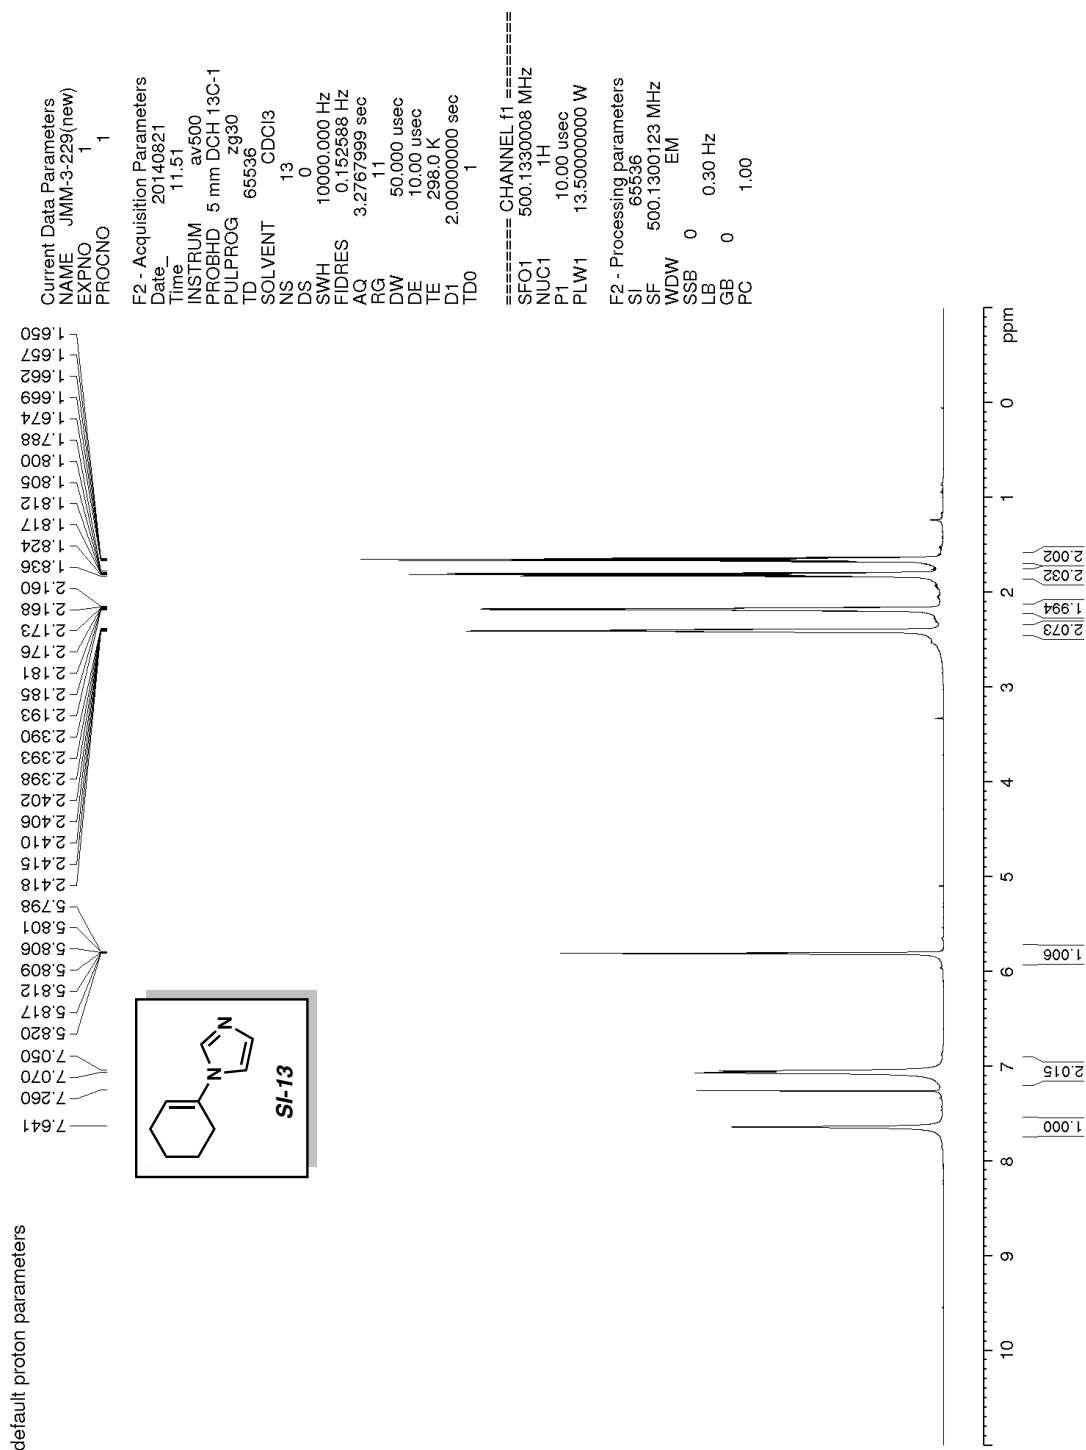

TCM-I-179pure

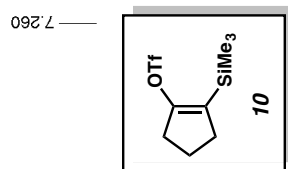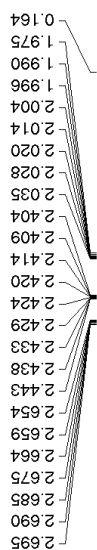

Current Data Parameters  
 NAME TCM-I-179pure  
 EXPNO 1  
 PROCNO 1

F2 - Acquisition Parameters  
 Date\_ 20140615  
 Time 14.08  
 INSTRUM dtx500  
 PROBHD 5 mm bb-Z Z800  
 PULPROG zg30  
 TD 65536  
 SOLVENT CDCl3  
 NS 16  
 DS 0  
 SWH 10000.000 Hz  
 FIDRES 0.152568 Hz  
 AQ 3.2767989 sec  
 RG 128  
 DW 50.000 usec  
 DE 6.00 usec  
 TE 296.9 K  
 D1 2.0000000 sec  
 TD0 1

==== CHANNEL f1 =====  
 NUC1 1H  
 P1 13.30 usec  
 PL1 0 dB  
 SFO1 500.330020 MHz

F2 - Processing parameters  
 SI 32768  
 SF 500.330022 MHz  
 WDW EM  
 SSB 0  
 LB 0.30 Hz  
 GB 0  
 PC 1.00

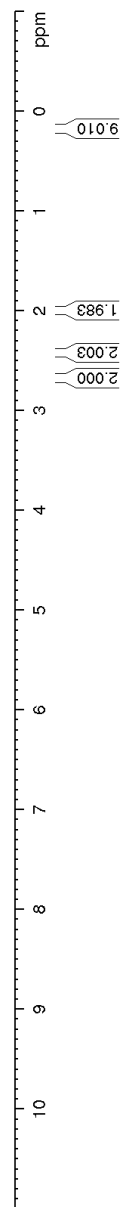

TCM-II-063F1

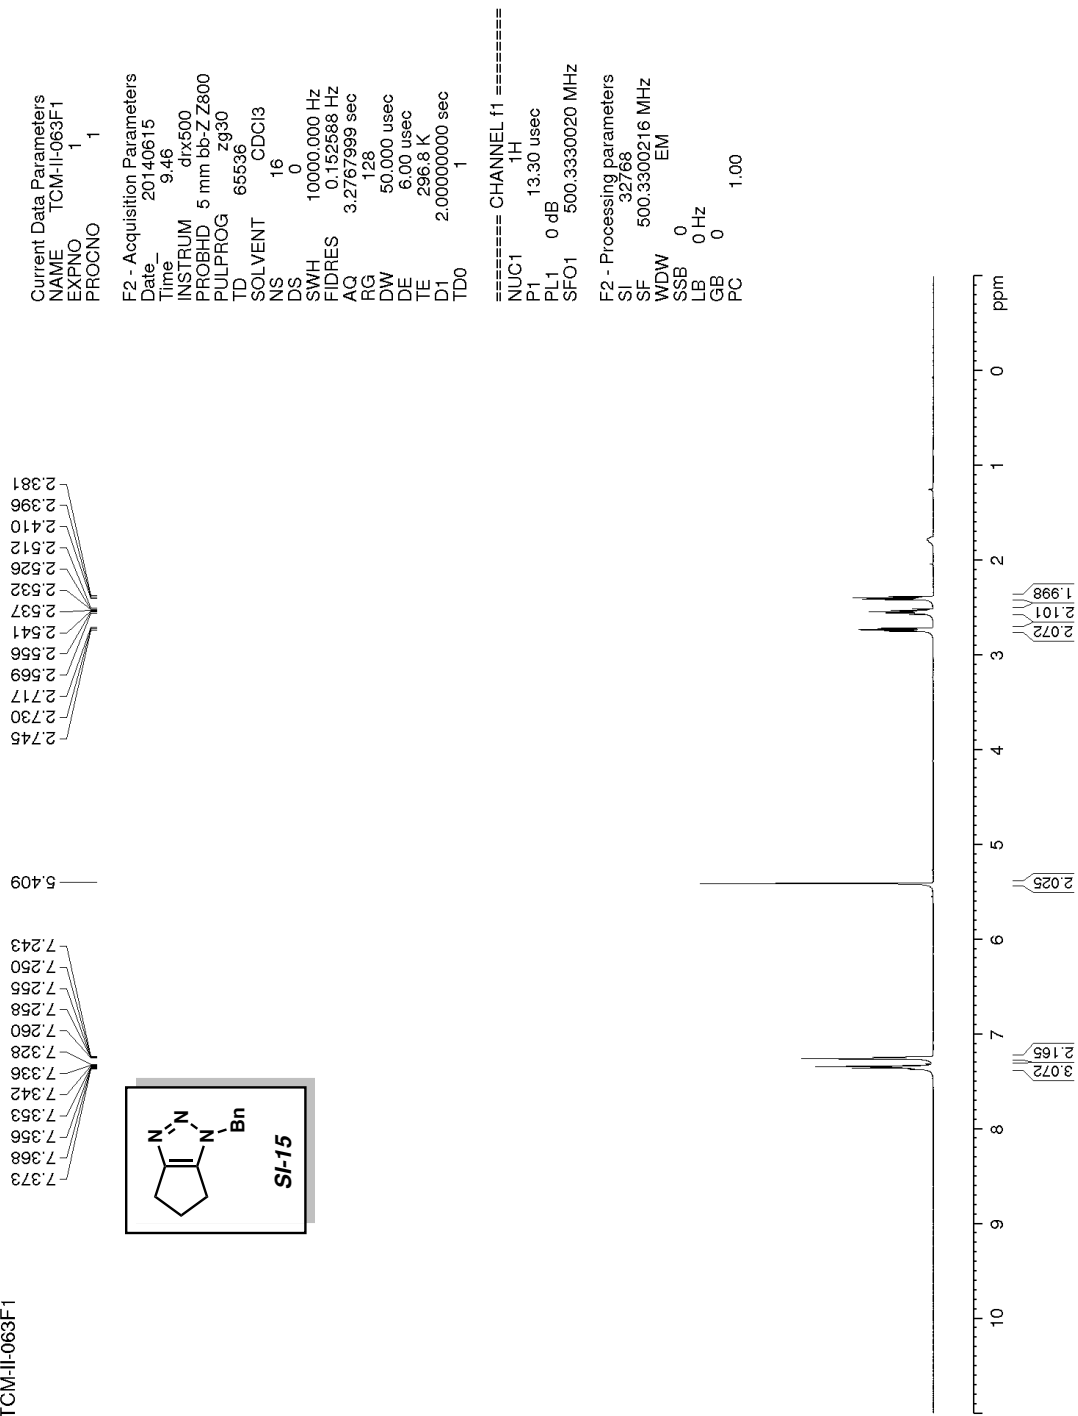

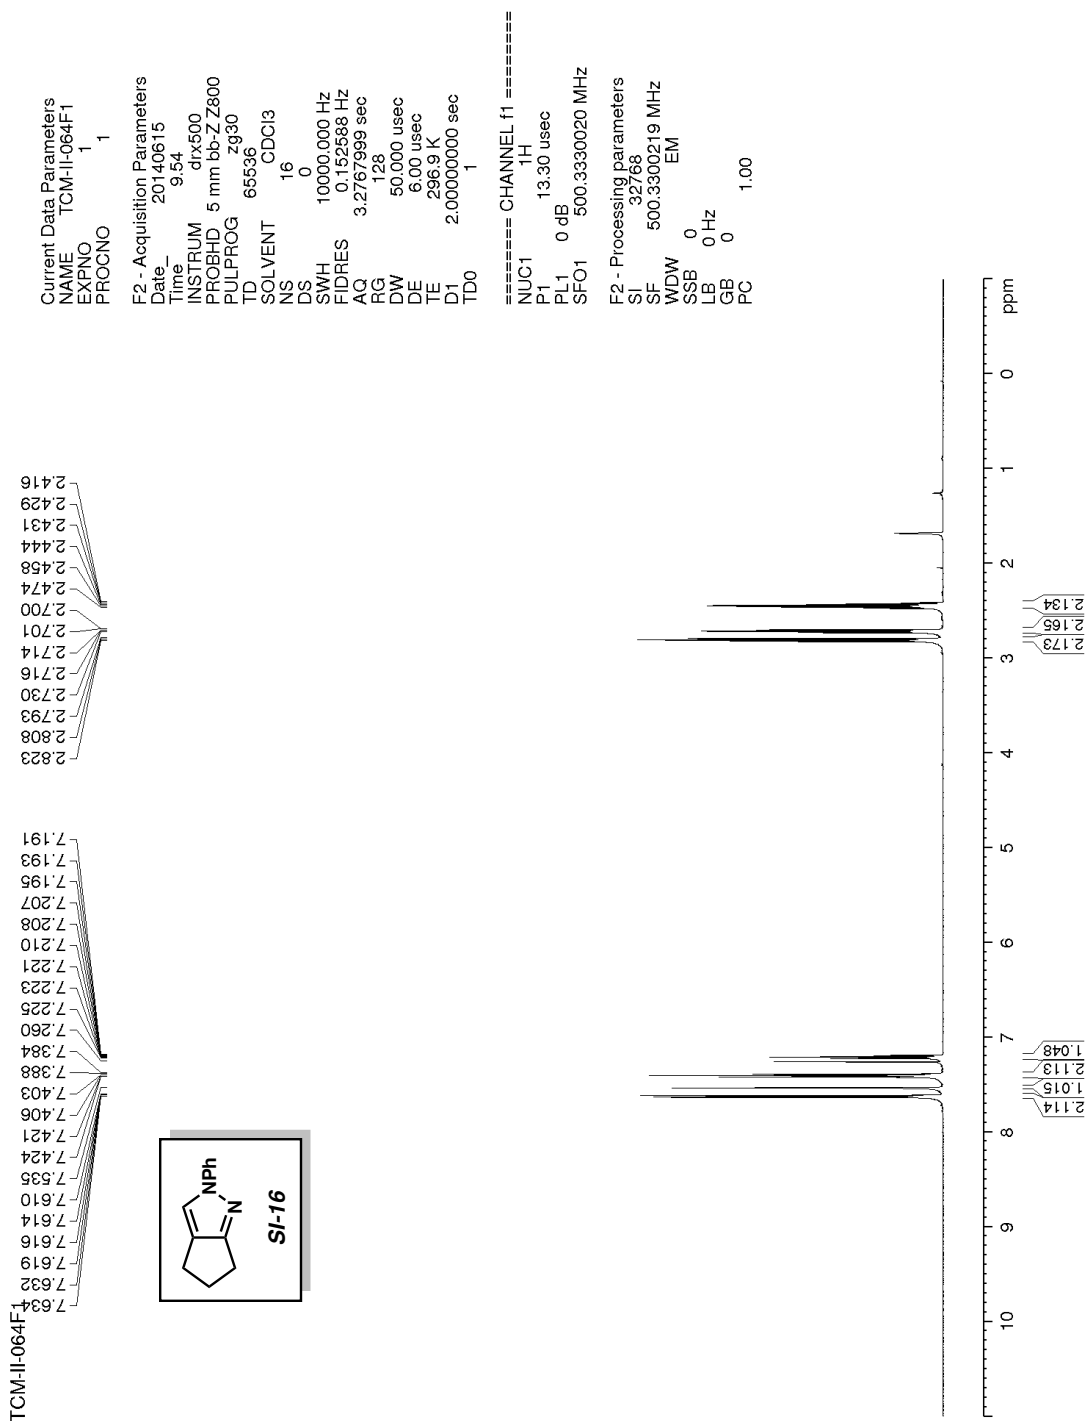

TCM-II-065F1

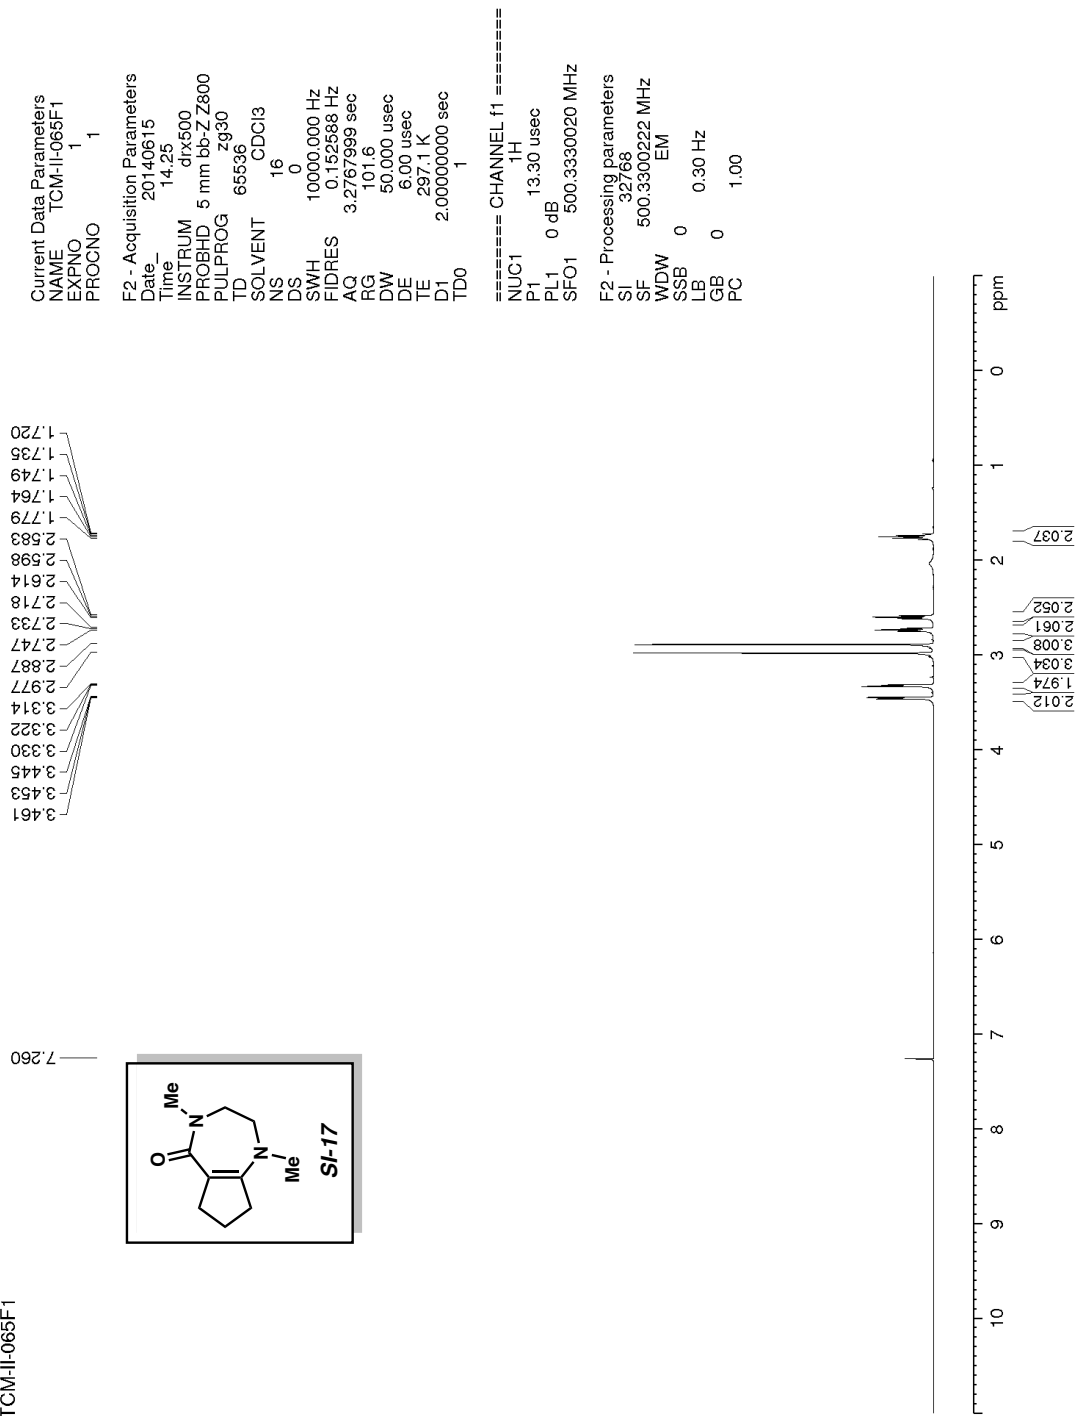



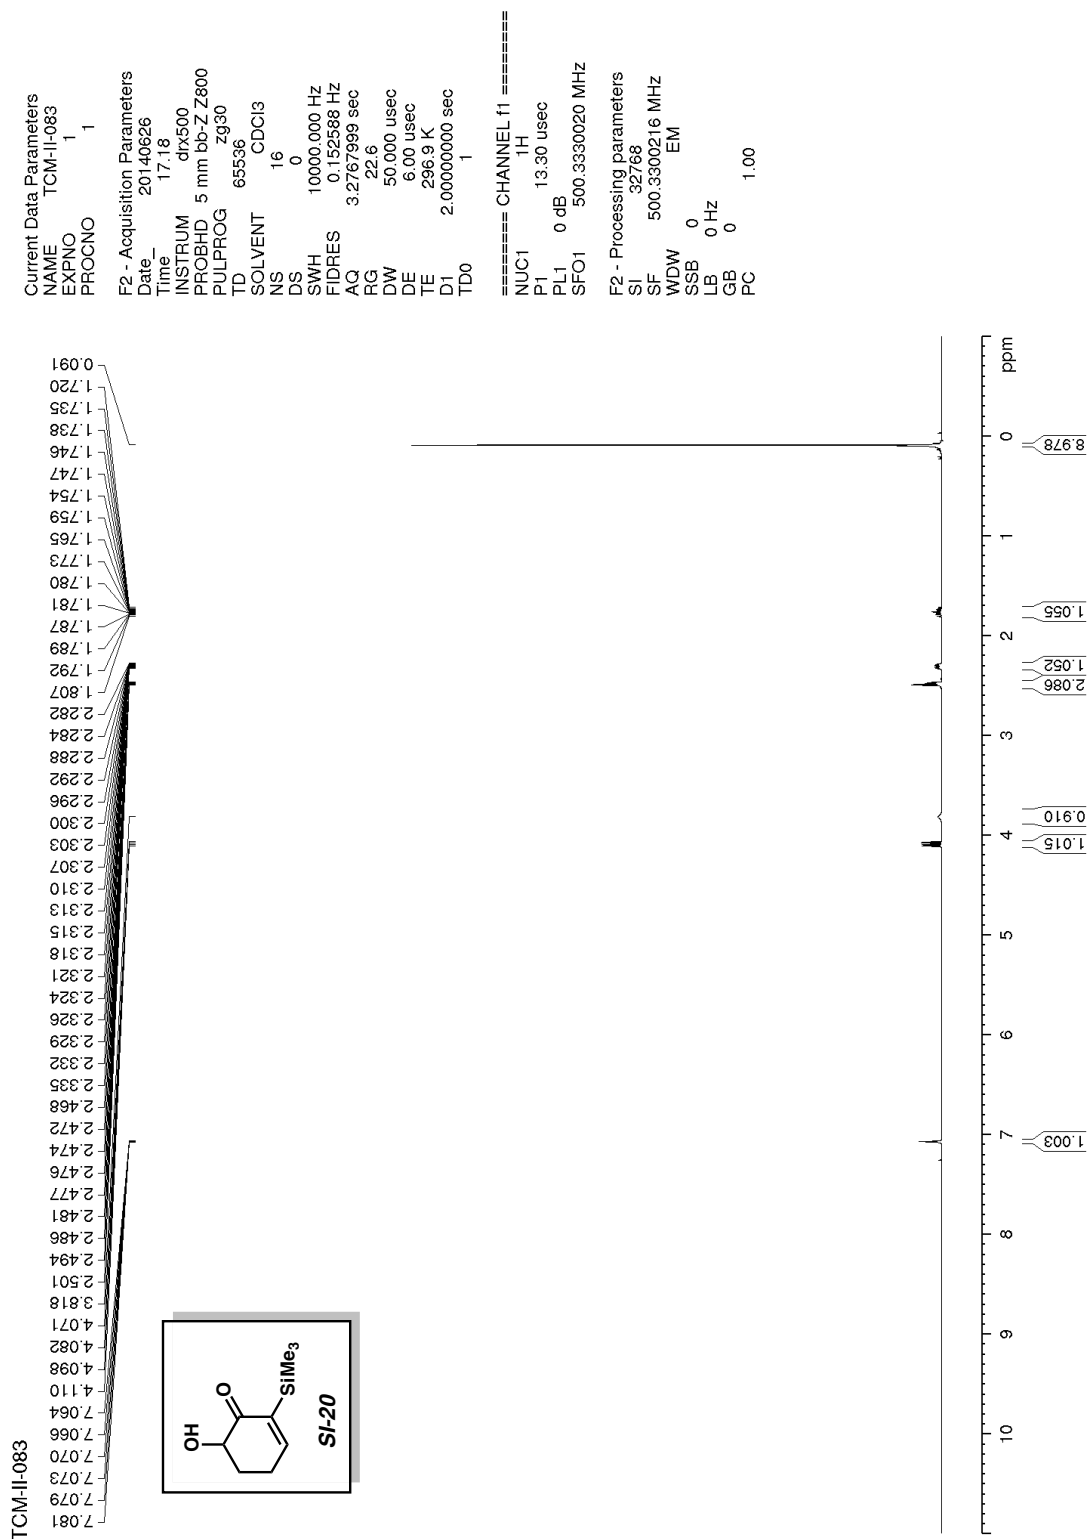

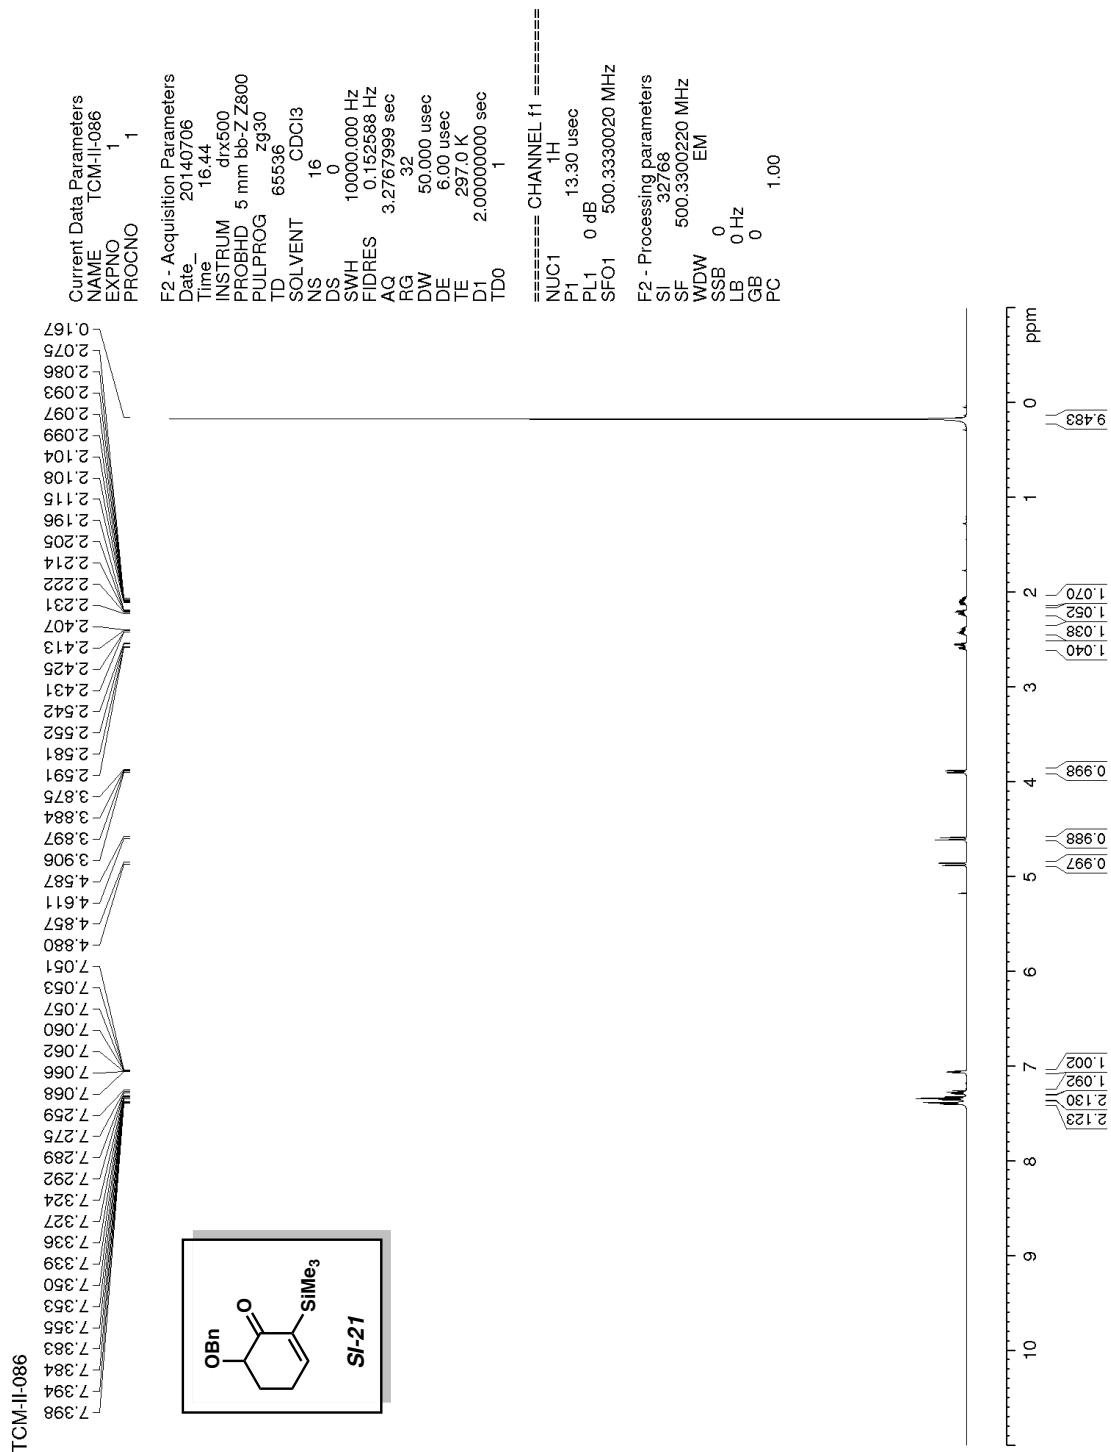

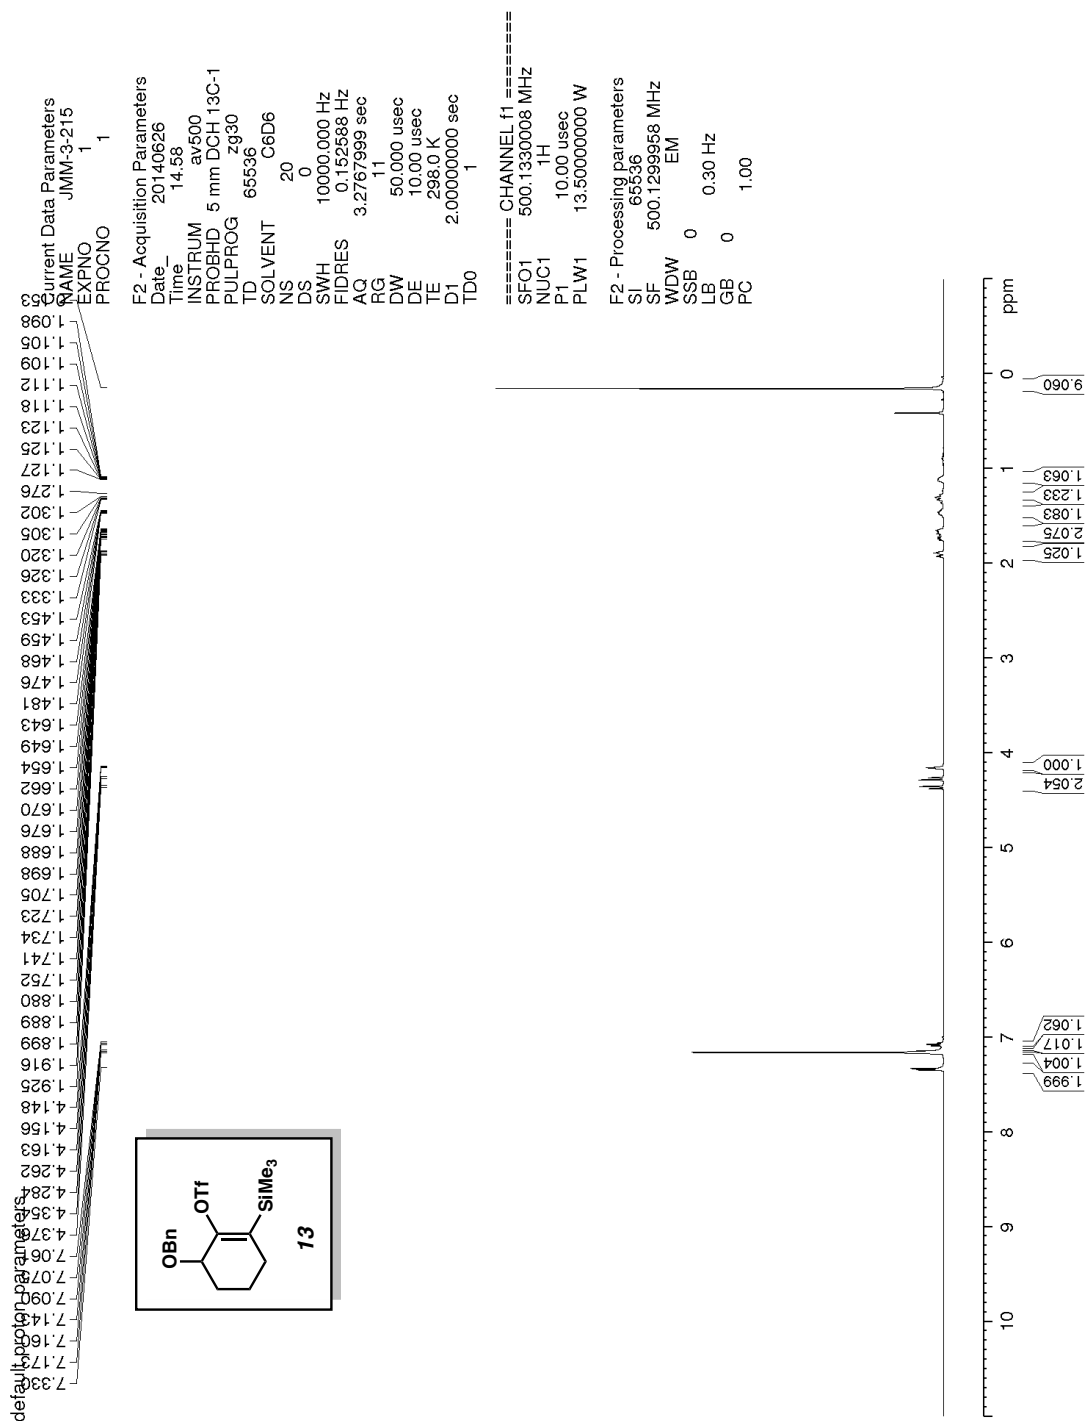

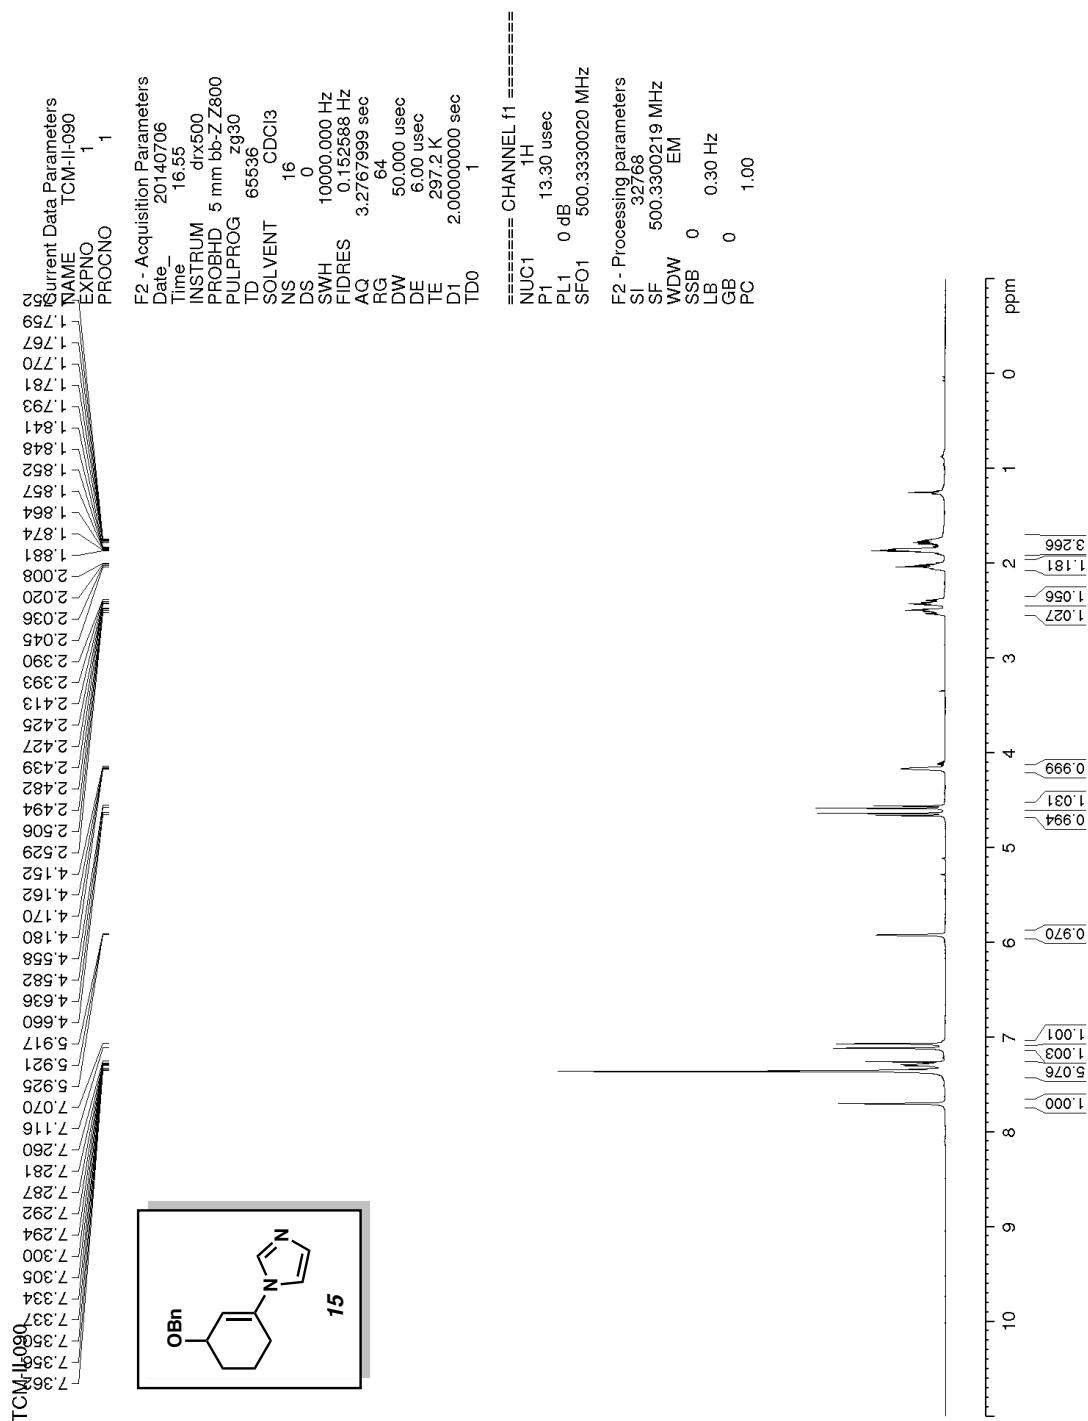

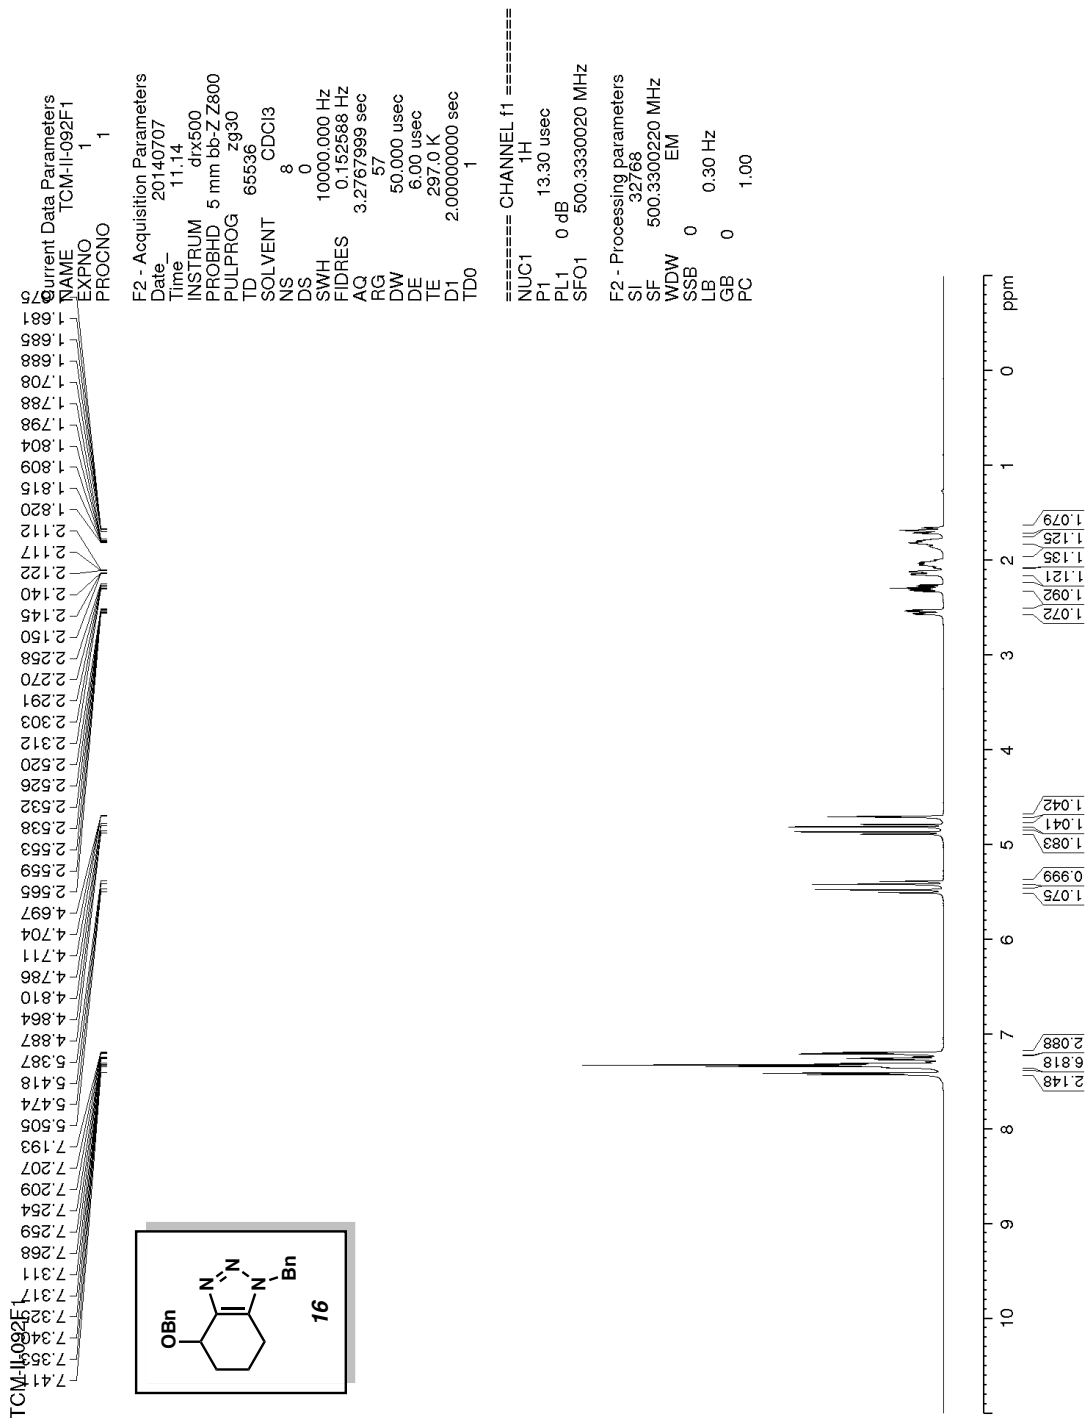

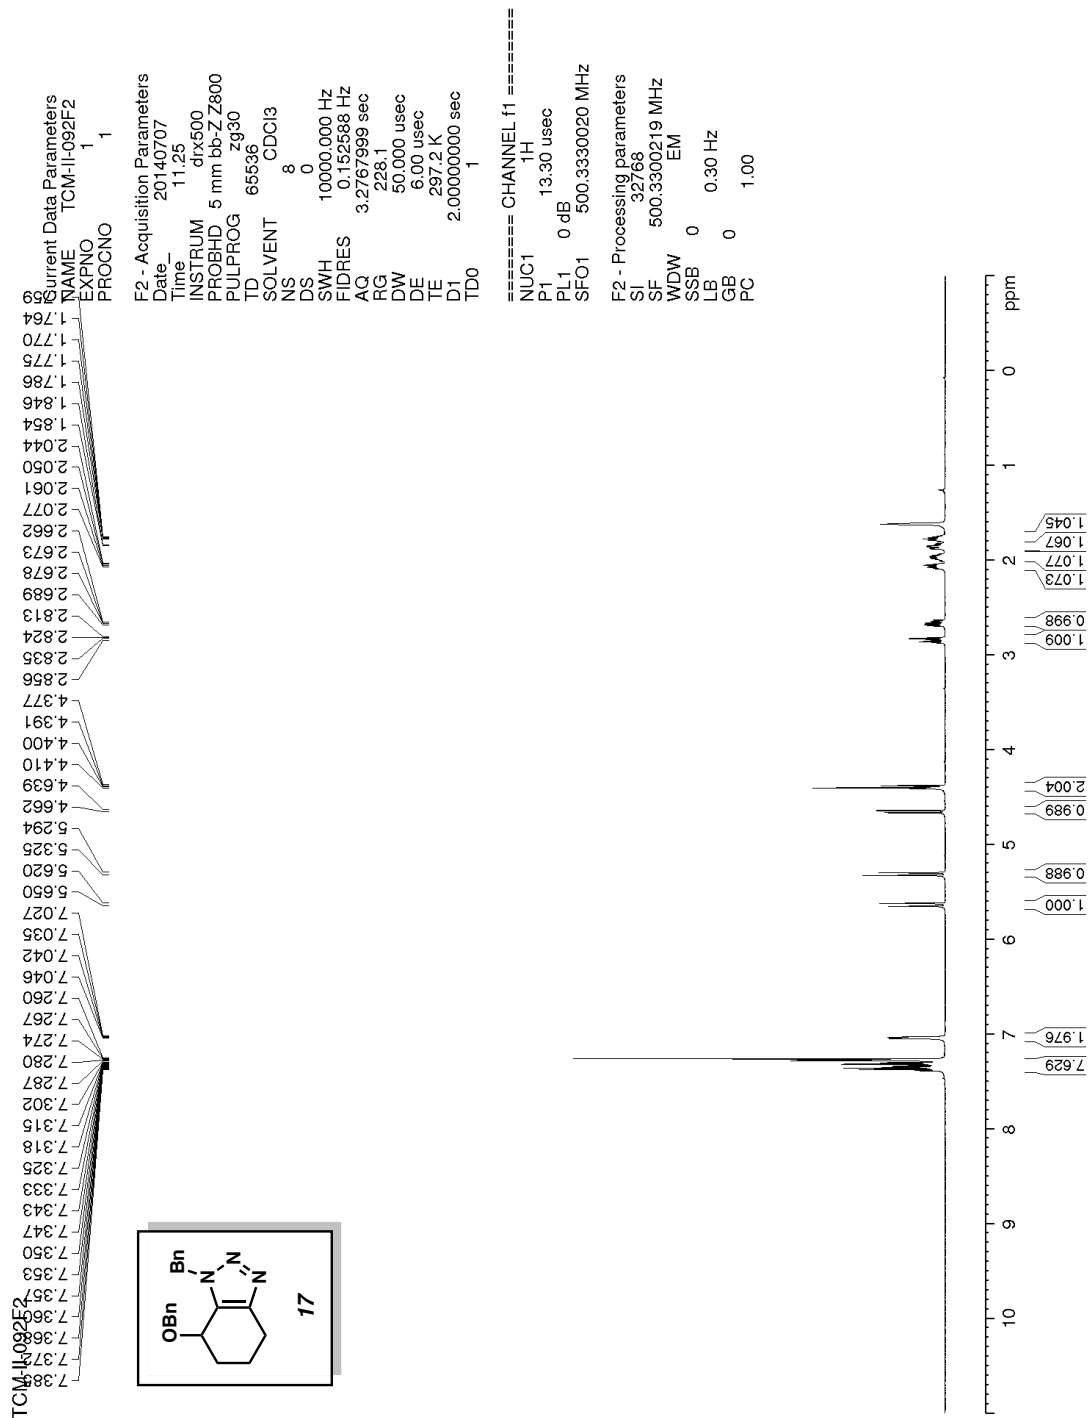

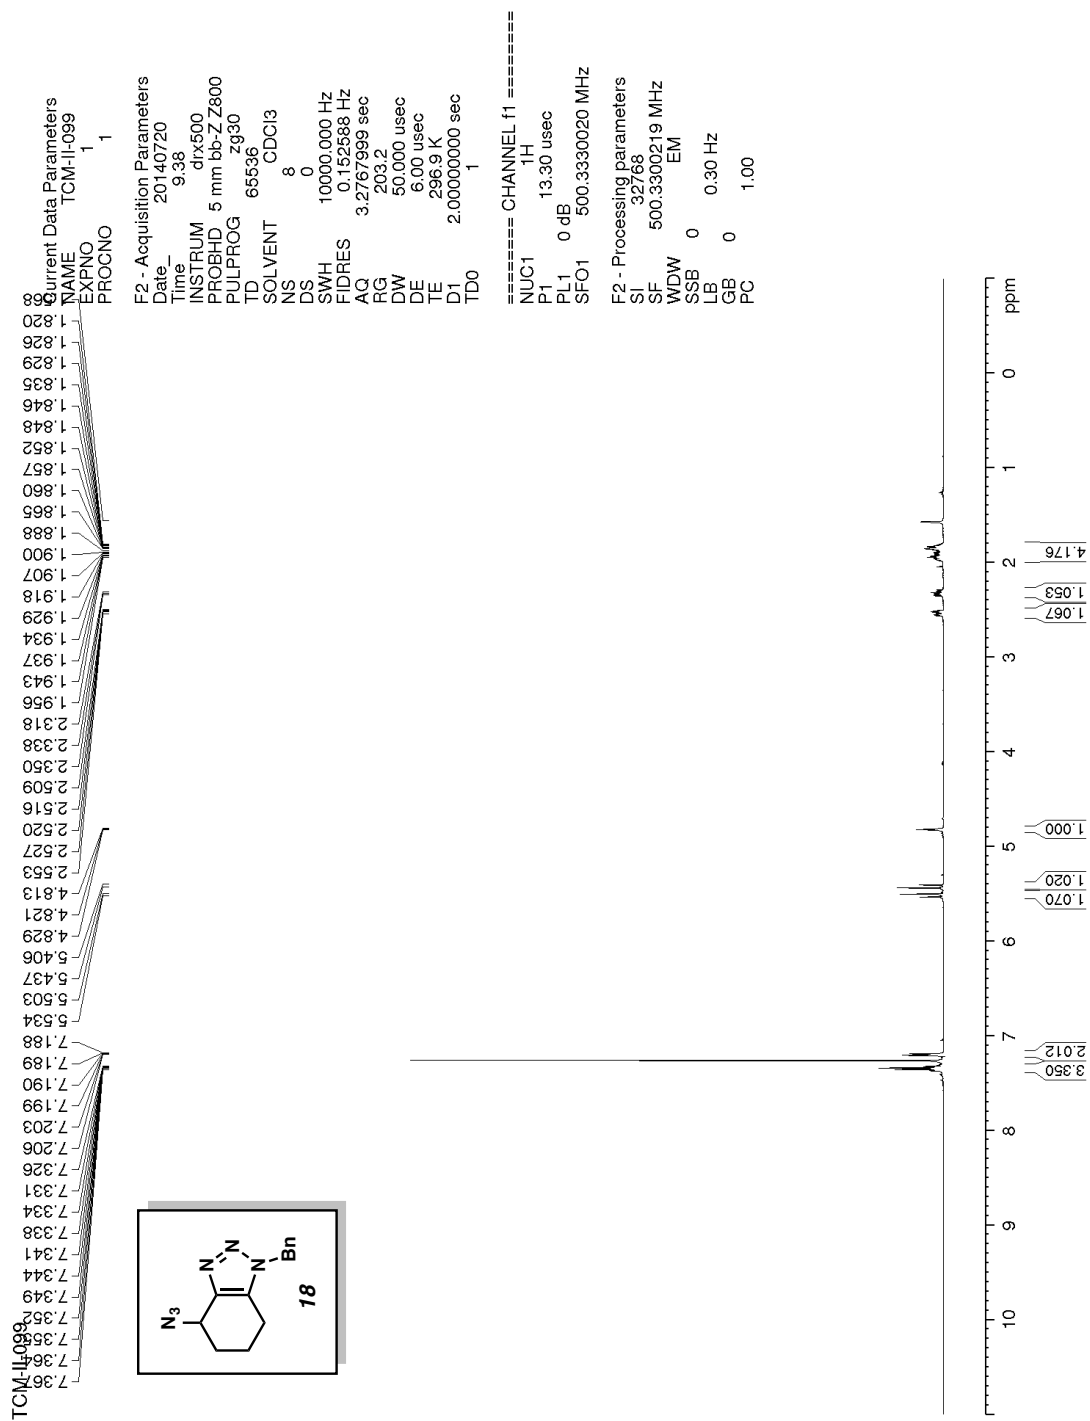

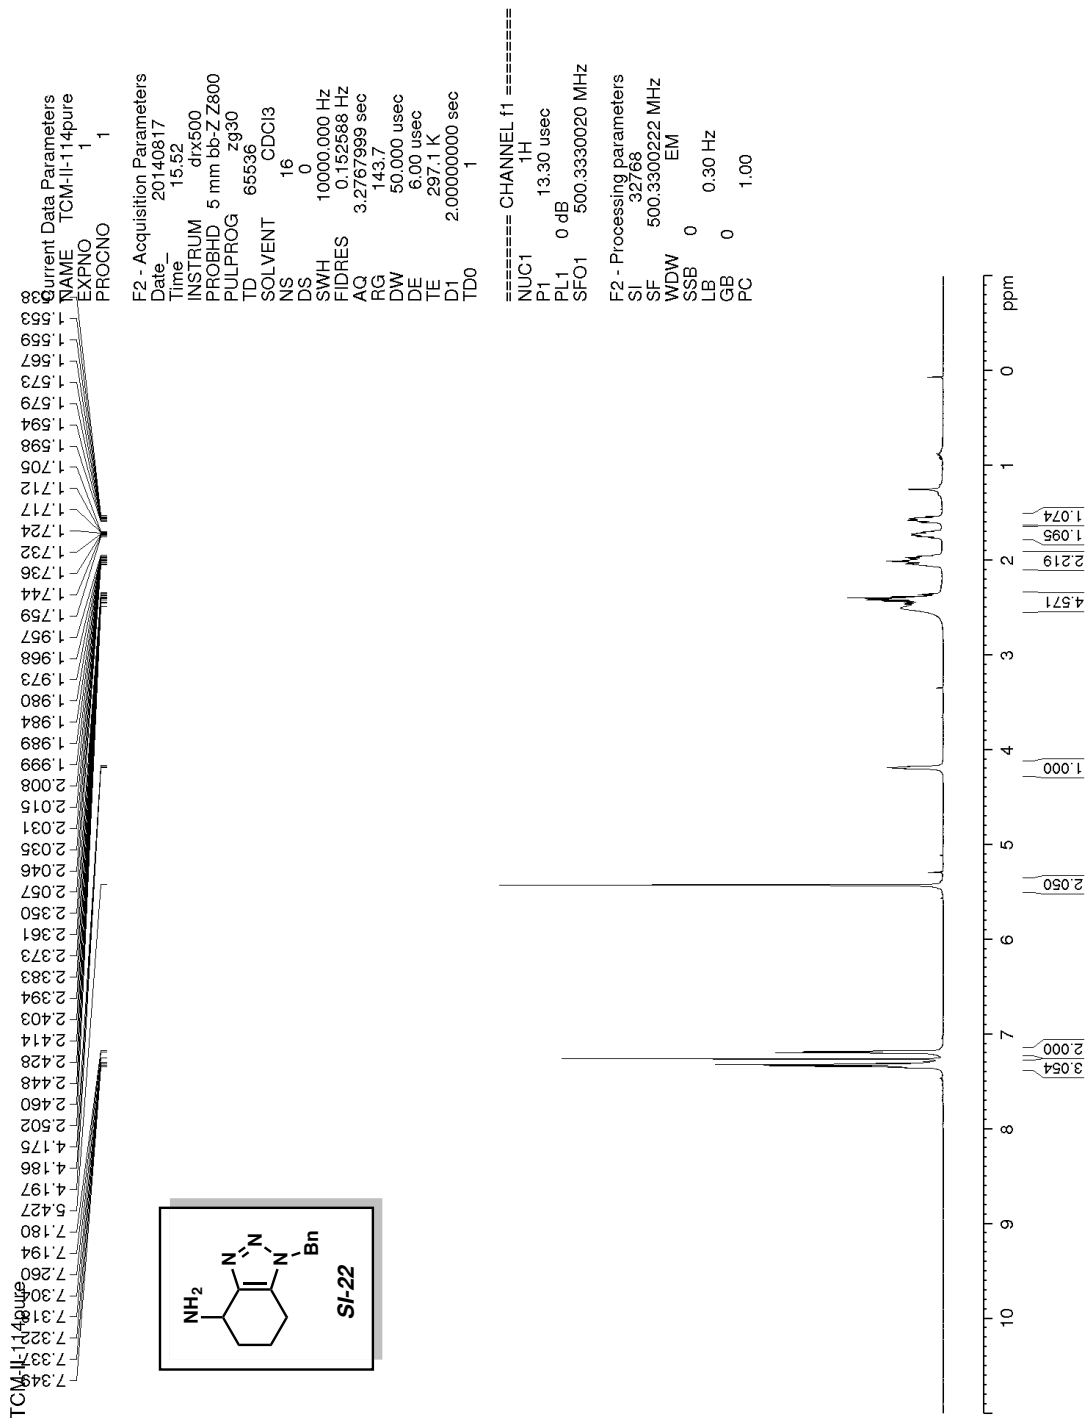



Current Data Parameters  
 NAME TCM-II-115  
 EXPNO 1  
 PROCNO 1

F2 - Acquisition Parameters  
 Date\_ 20140808  
 Time 16.06  
 INSTRUM dx500  
 PROBHD 5 mm bb-Z Z800  
 PULPROG zg30  
 TD 65536  
 SOLVENT CDCl3  
 NS 16  
 DS 0  
 SWH 10000.000 Hz  
 FIDRES 0.152588 Hz  
 AQ 3.2767989 sec  
 RG 161.3  
 DW 50.000 usec  
 DE 6.00 usec  
 TE 297.1 K  
 D1 2.00000000 sec  
 TD0 1

==== CHANNEL f1 =====  
 NUC1 1H  
 P1 13.30 usec  
 PL1 0 dB  
 SFO1 500.3330020 MHz

F2 - Processing parameters  
 SI 32768  
 SF 500.3300219 MHz  
 WDW EM  
 SSB 0  
 LB 0.30 Hz  
 GB 0  
 PC 1.00

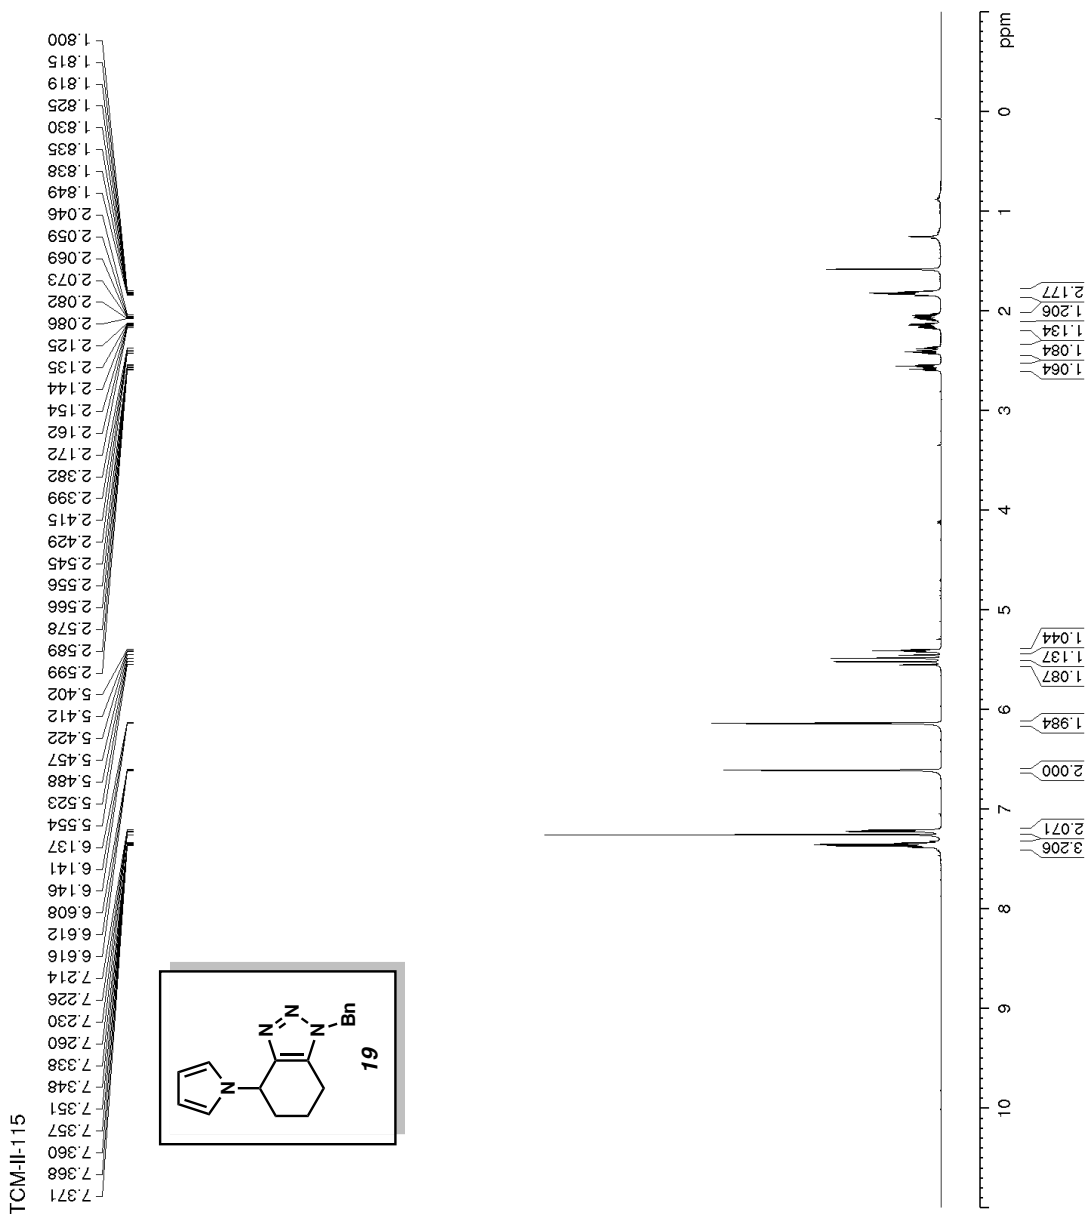

## **$^{13}\text{C}$ NMR Spectra:**

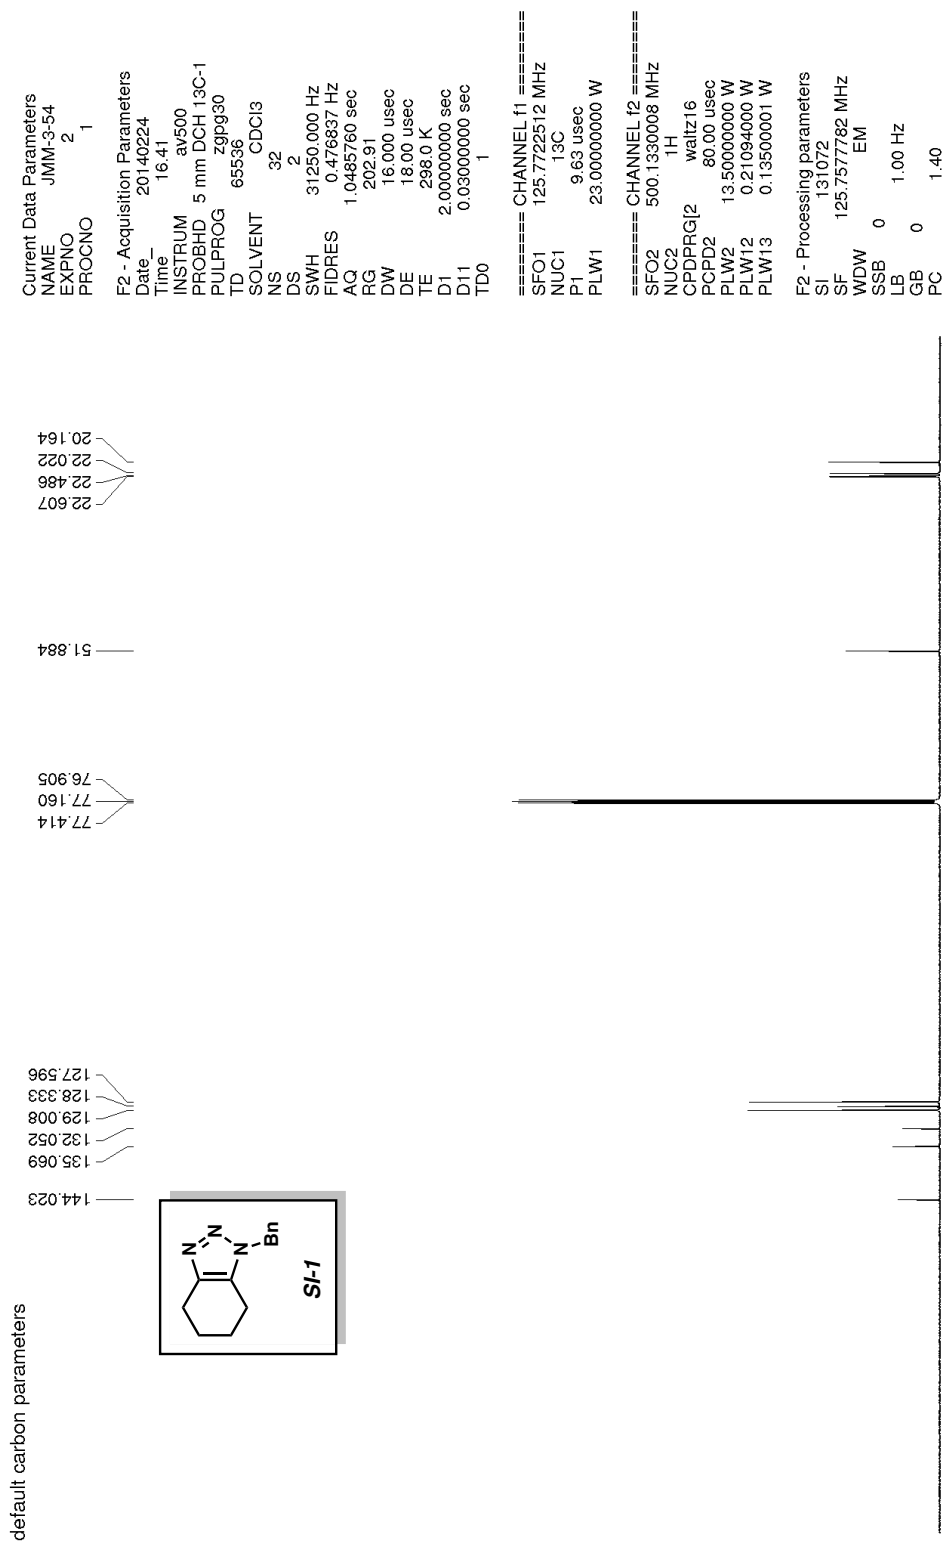

default carbon parameters

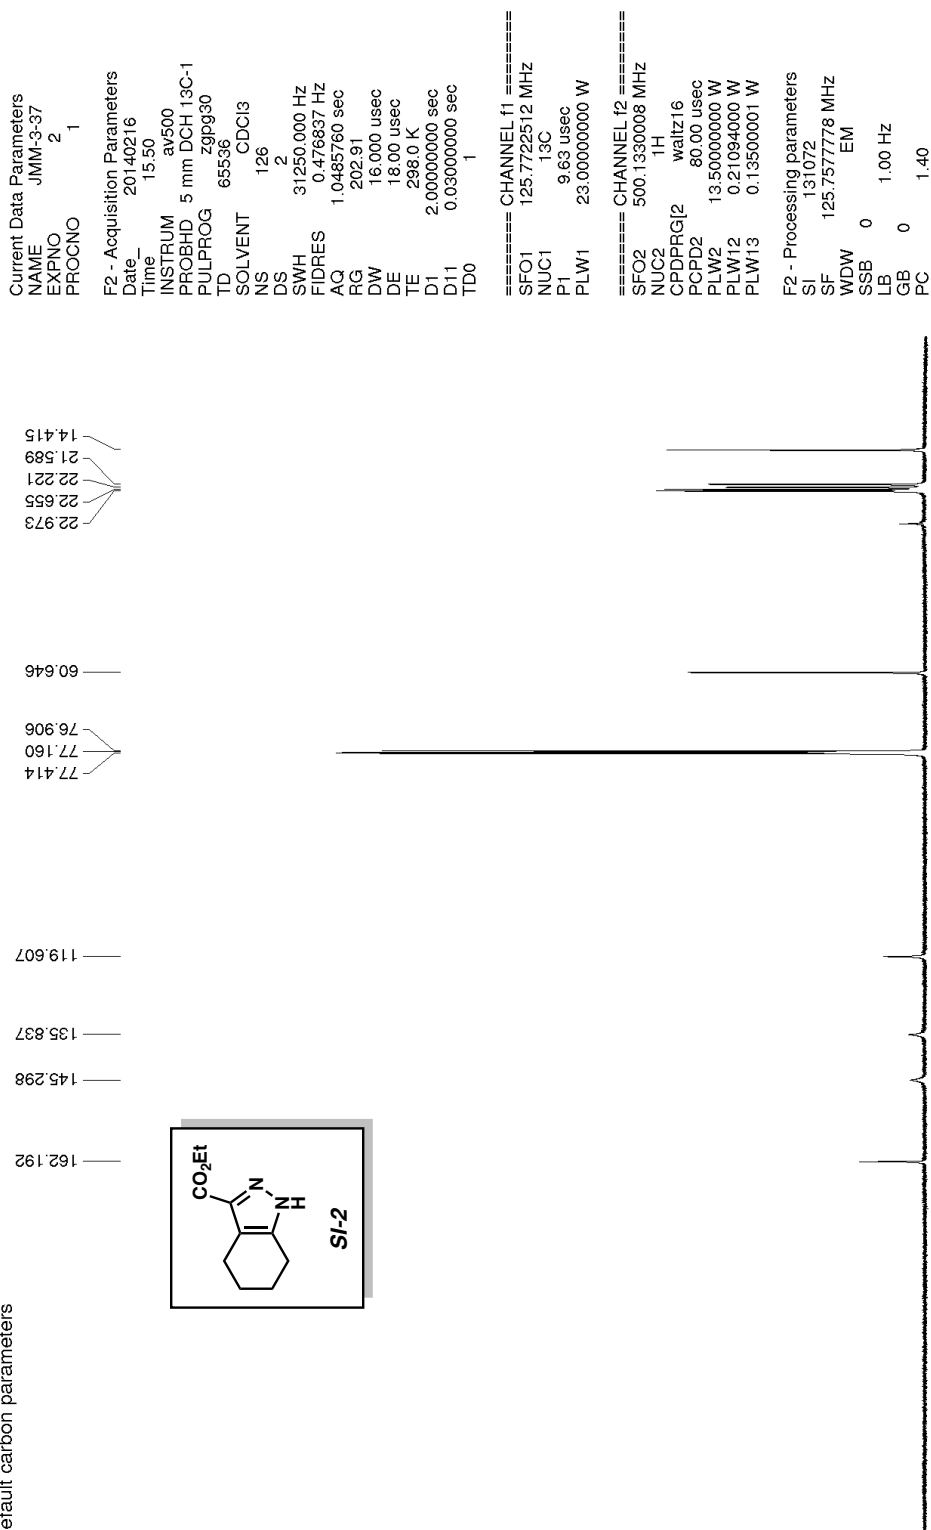

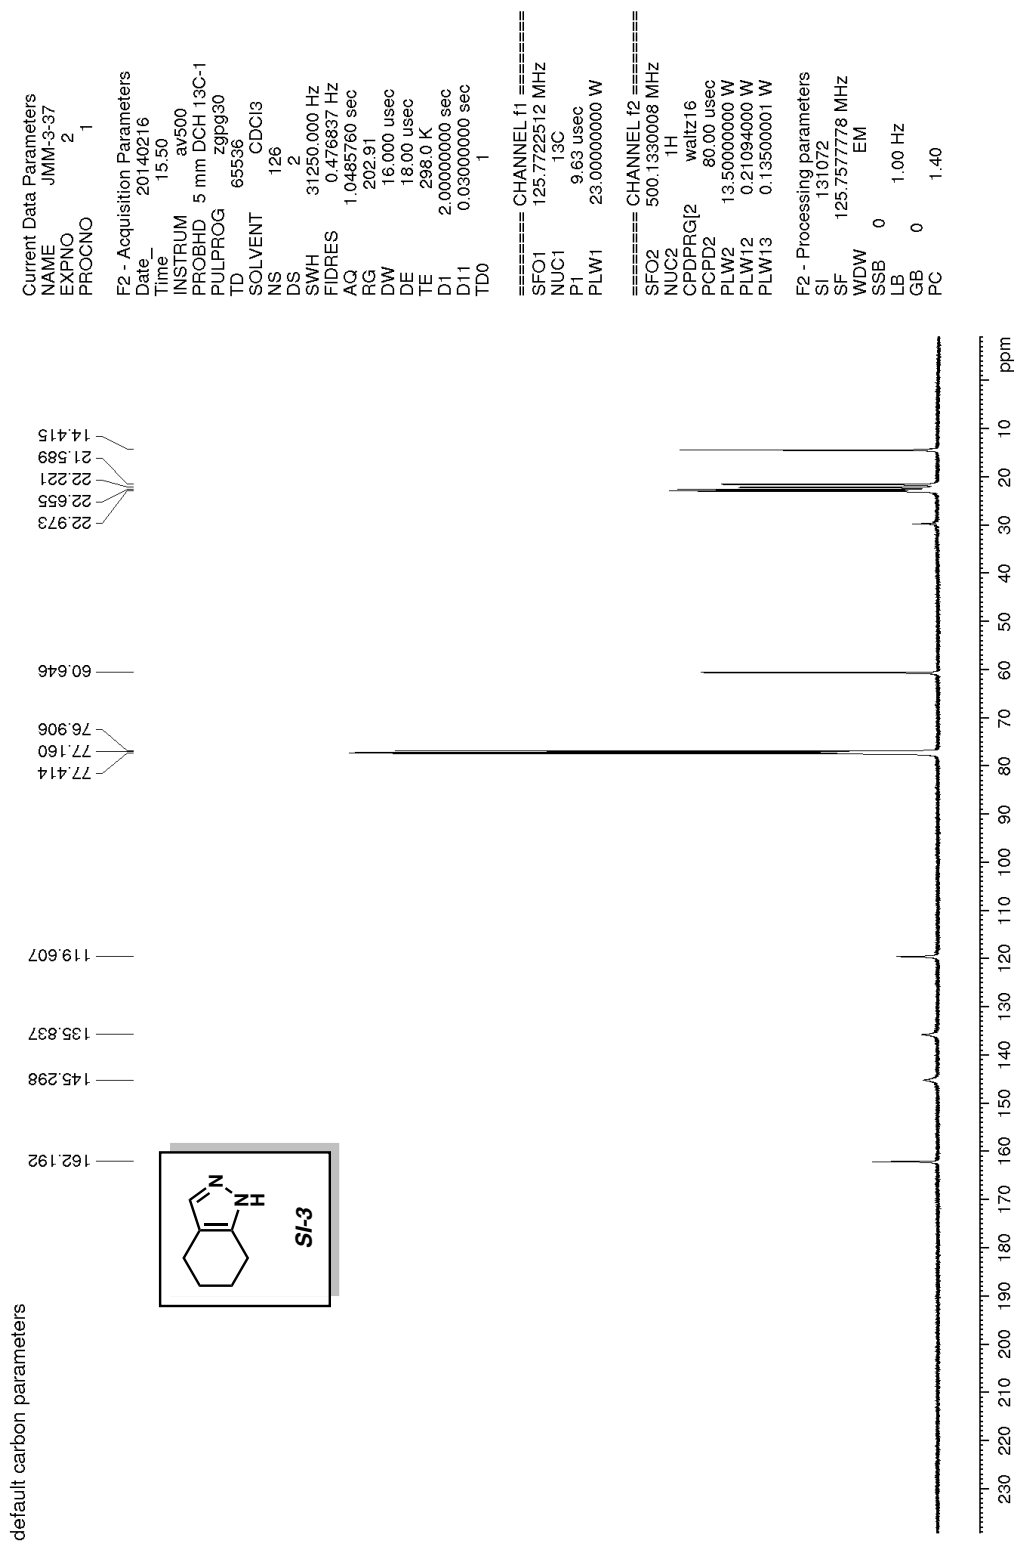

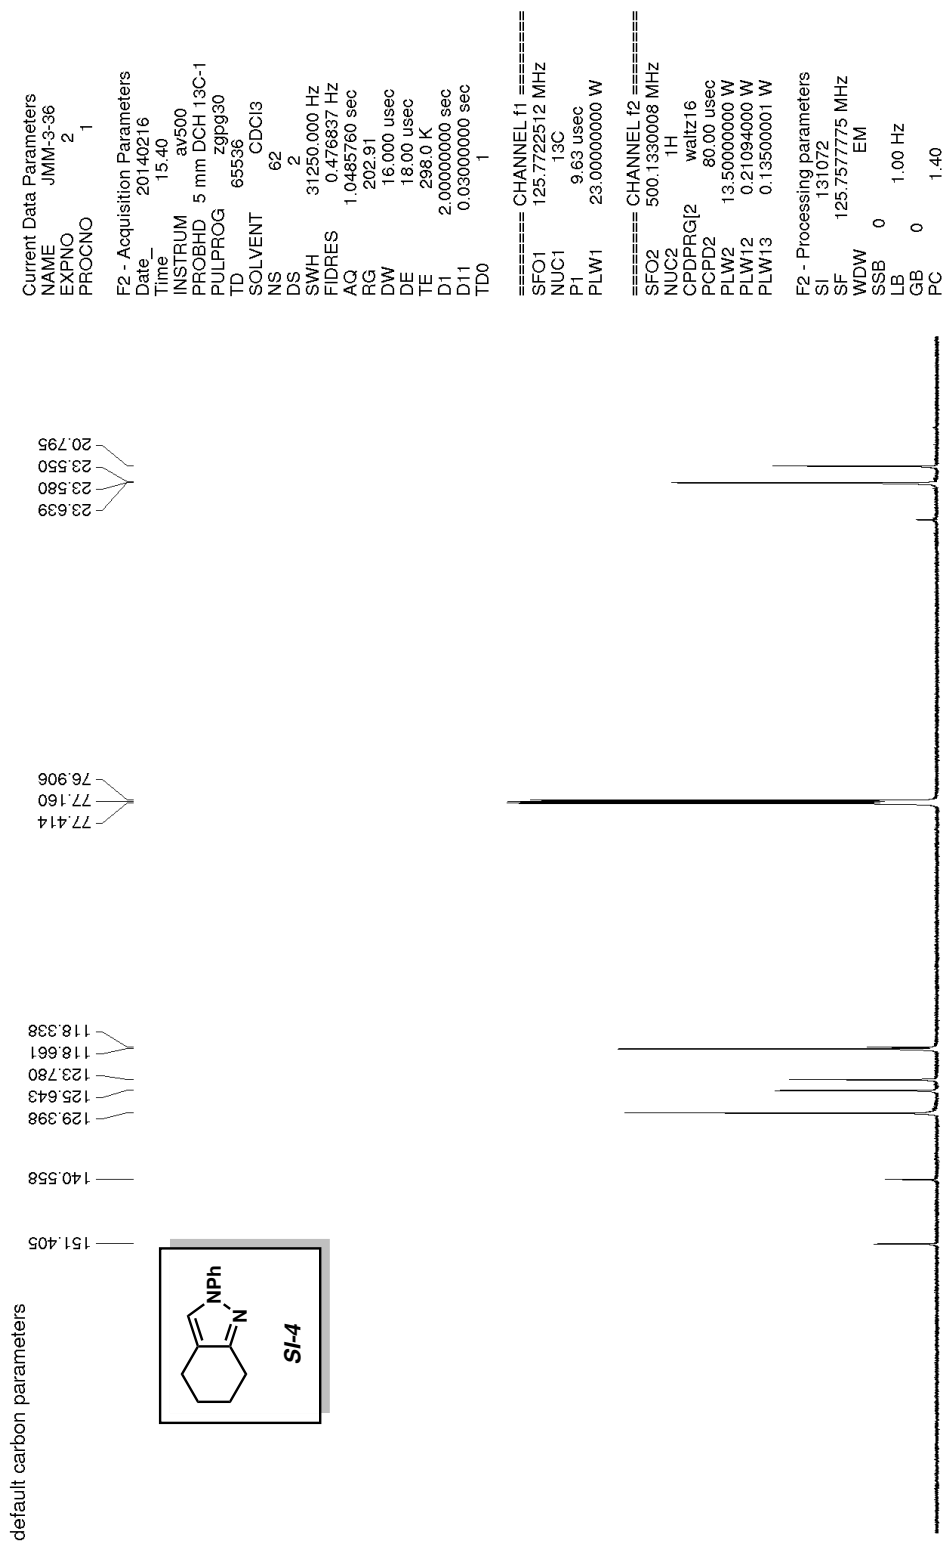

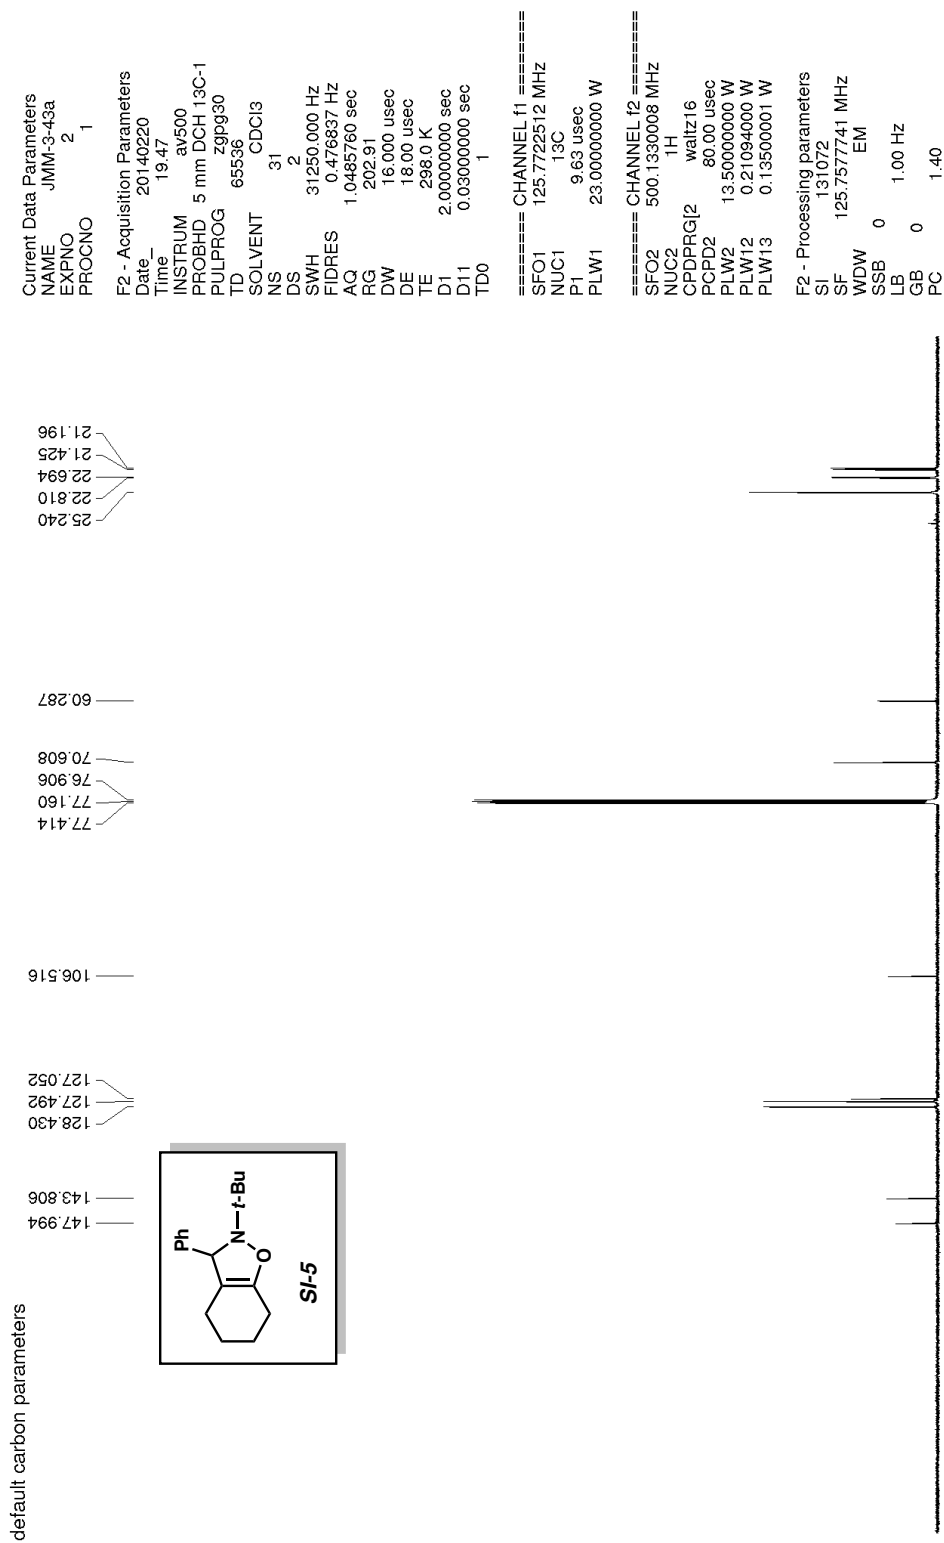

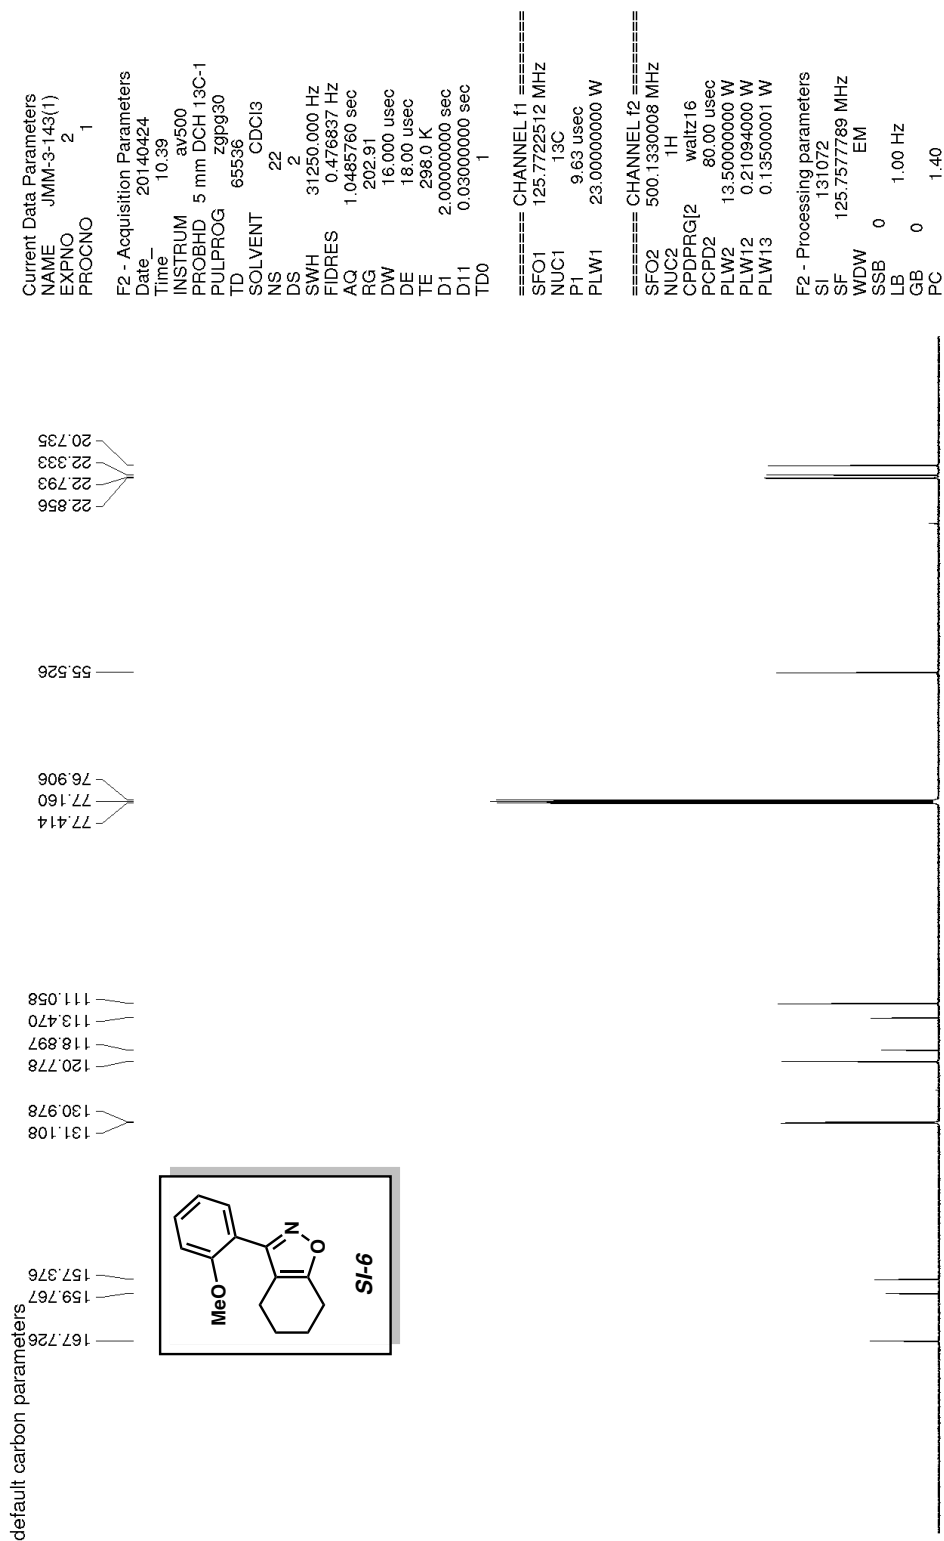



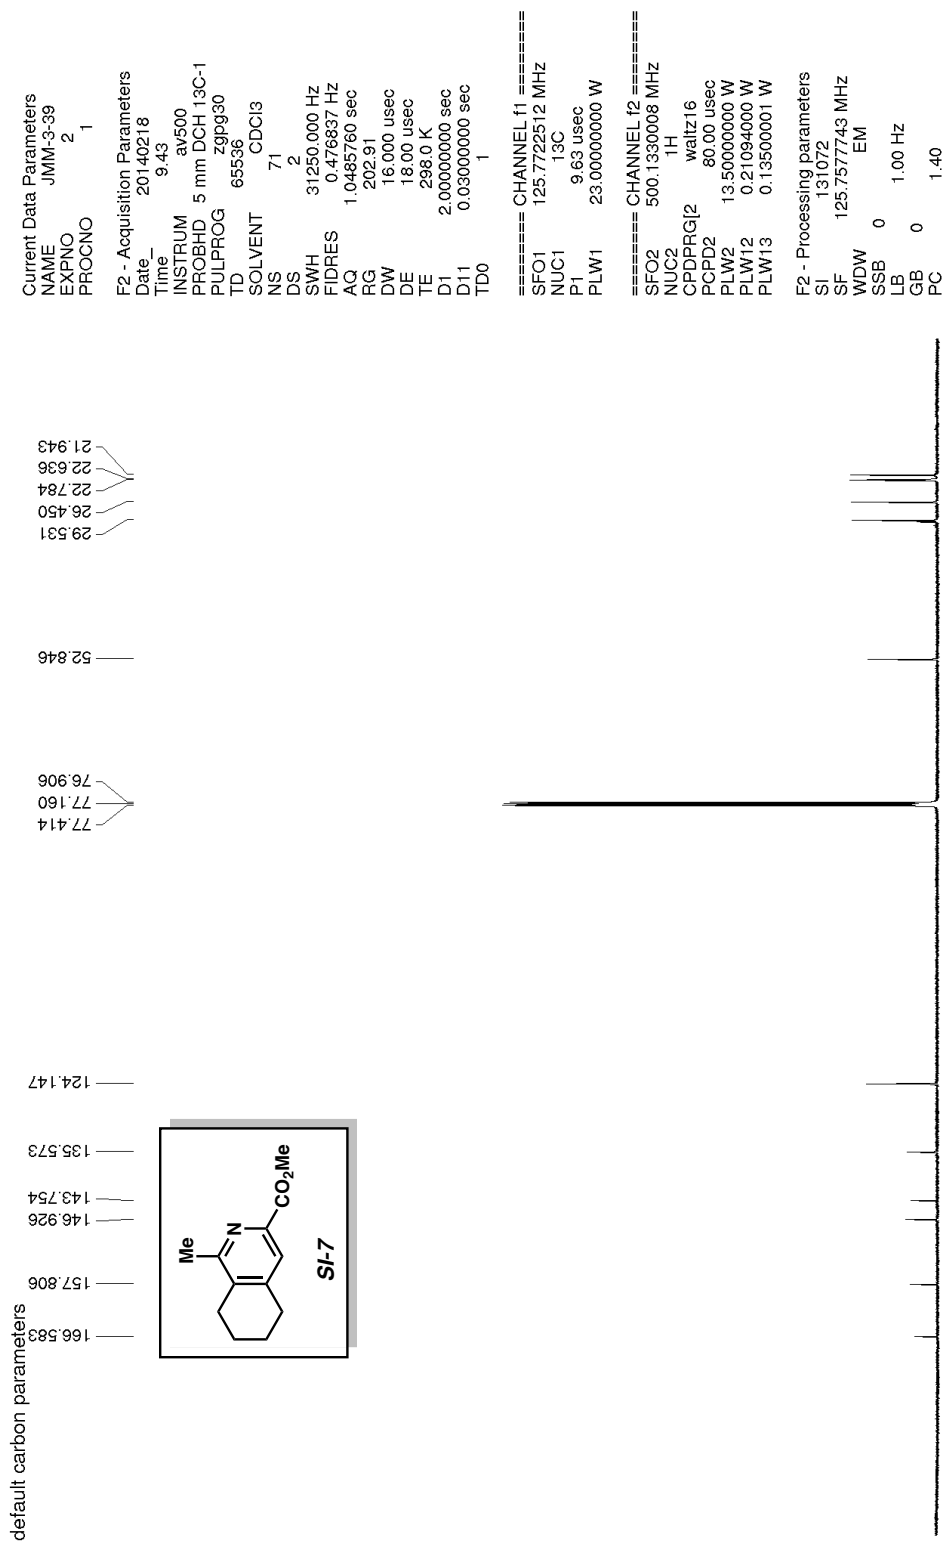

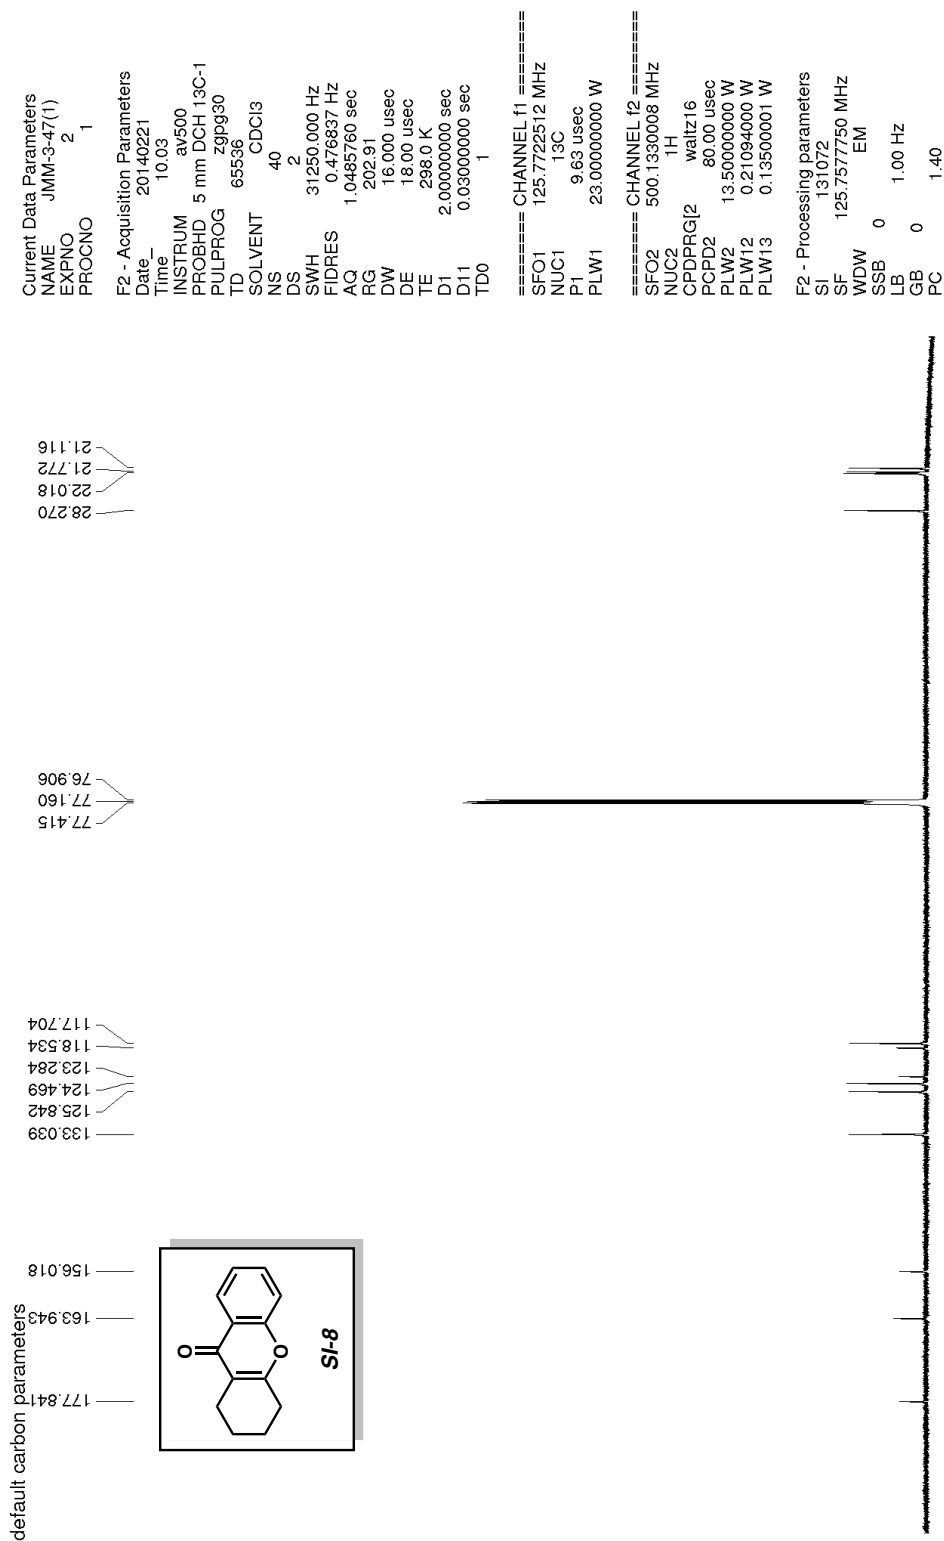

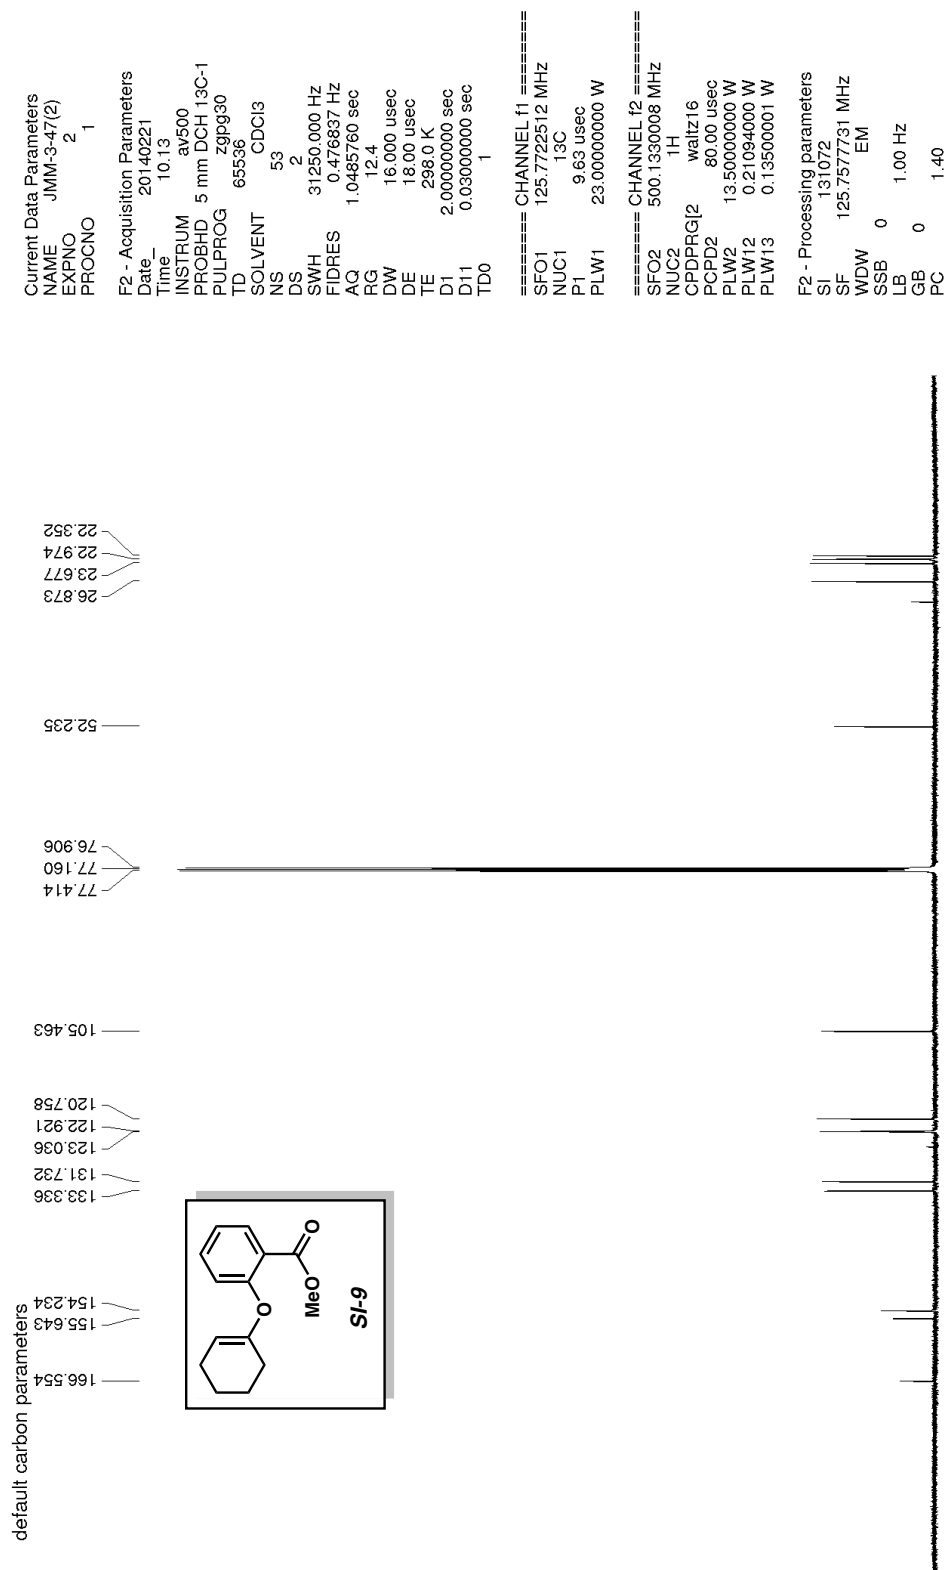

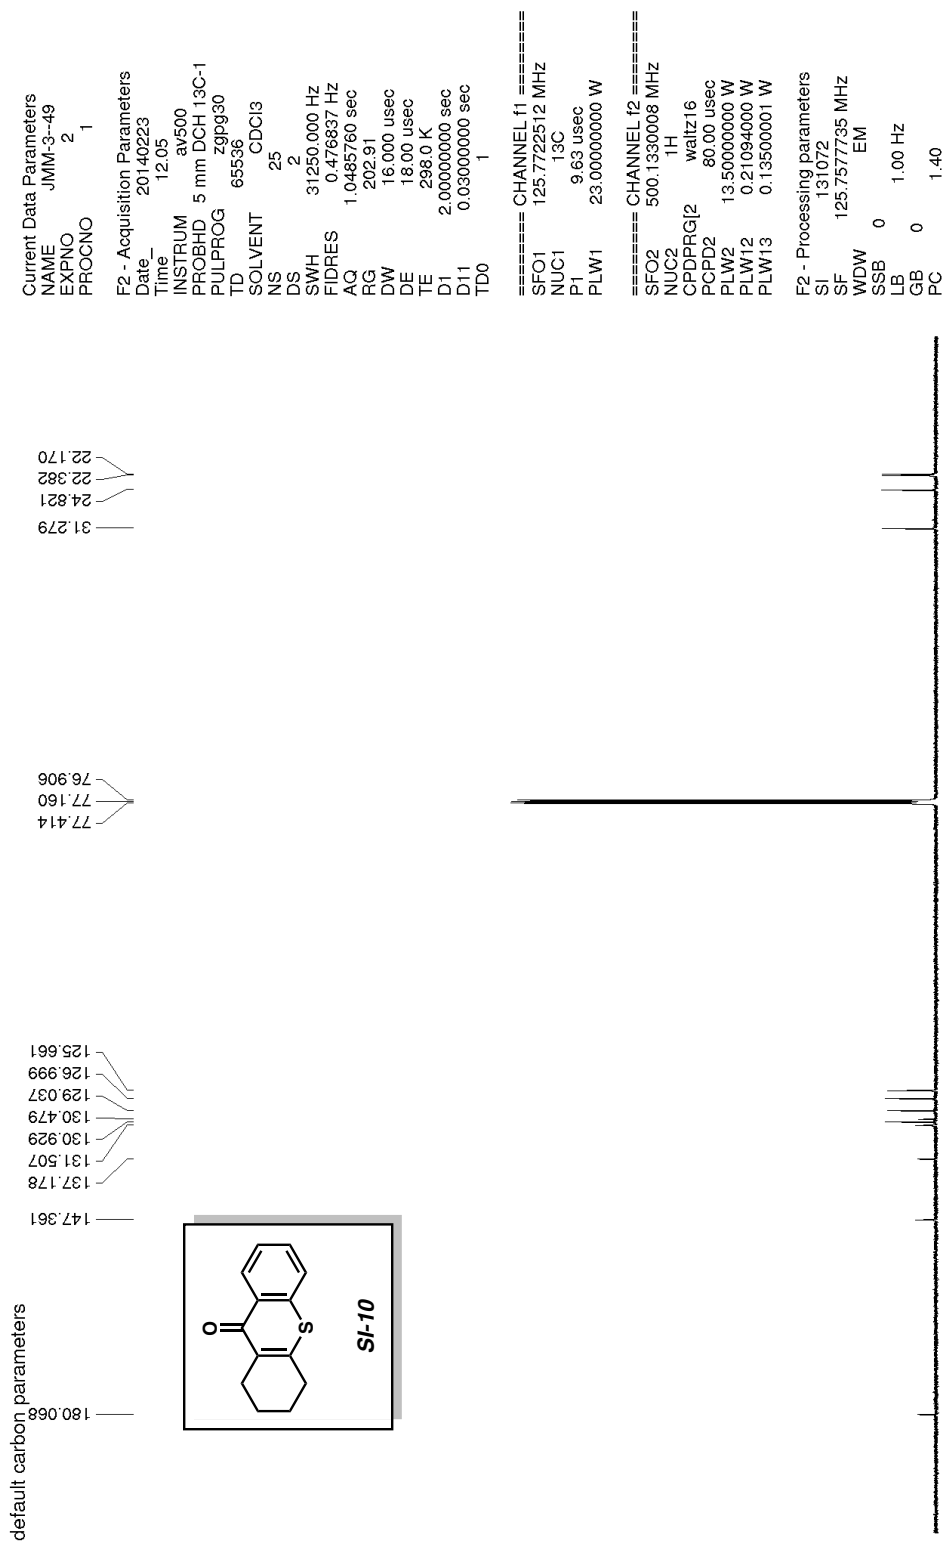

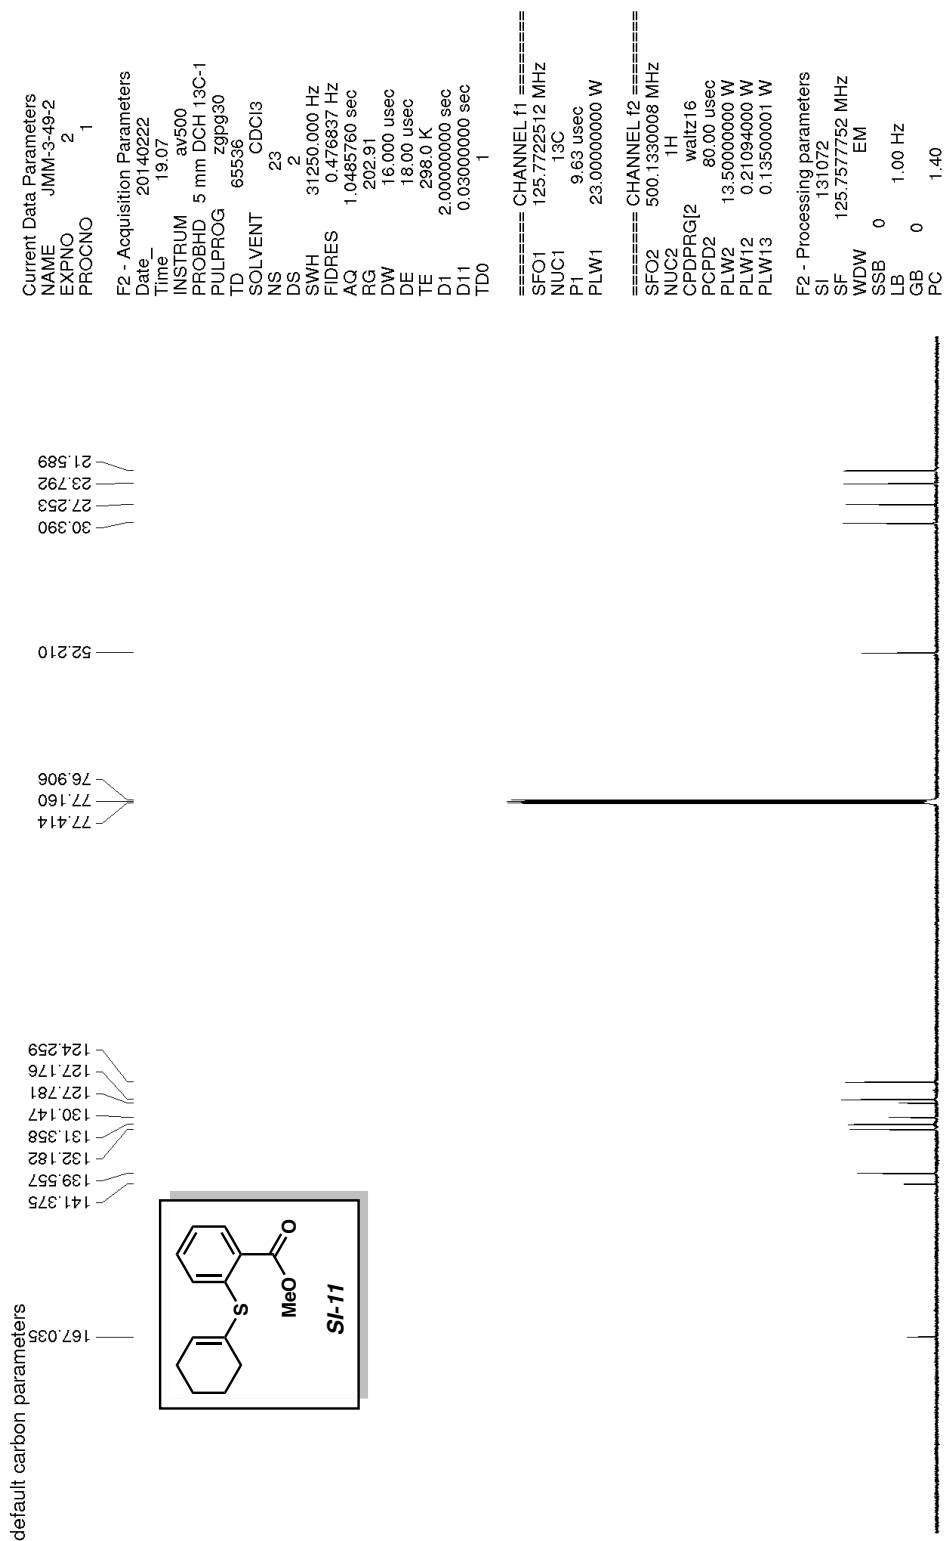

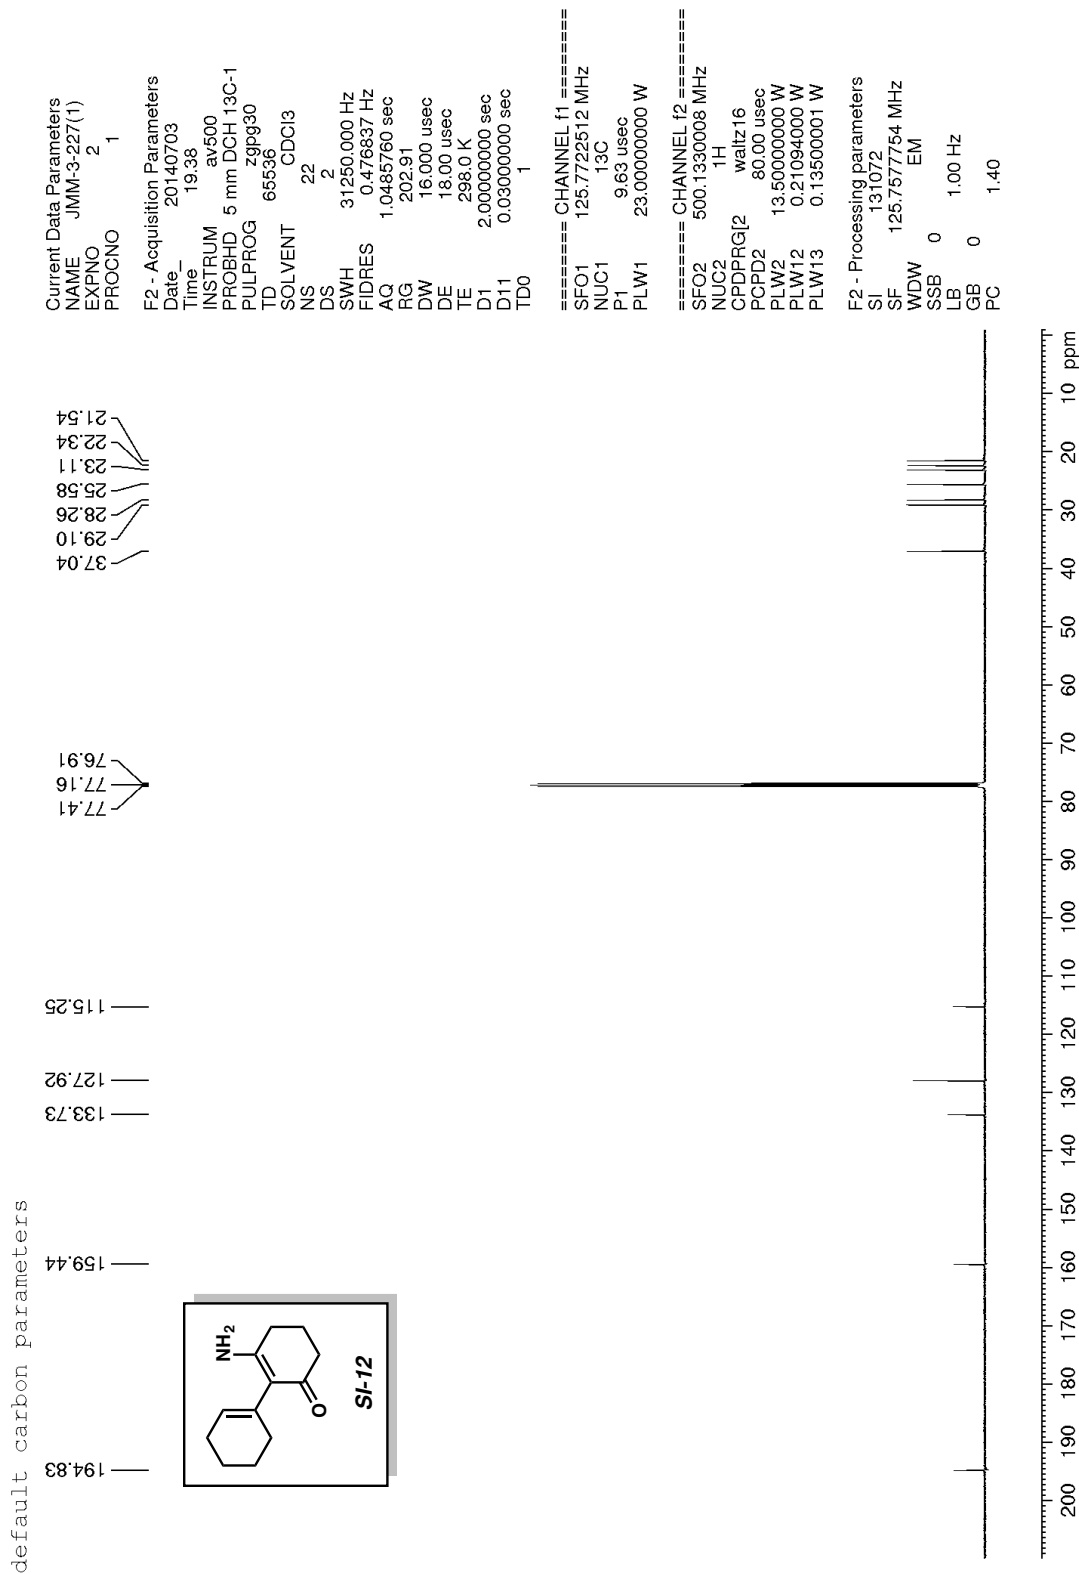

default carbon parameters

134.63  
133.86  
129.44  
116.66  
116.49

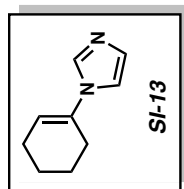

77.41  
77.16  
76.91

27.43  
24.19  
22.46  
21.79

```

Current Data Parameters
NAME      JMM-3-229(1)
EXPNO     2
PROCNO    1

F2 - Acquisition Parameters
Date_     20140703
Time      19.45
INSTRUM   av500
PROBHD    5 mm DCH 13C-1
PULPROG   zgpg30
TD         65536
SOLVENT   CDCl3
NS         21
DS         2
SWH        31250.000 Hz
FIDRES     0.476837 Hz
AQ         1.0485760 sec
RG         202.91
DW         16.000 usec
DE         18.00 usec
TE         298.0 K
D1         2.00000000 sec
D11        0.03000000 sec
TD0        1

===== CHANNEL f1 =====
SFO1      125.7722512 MHz
NUC1       13C
P1         9.63 usec
PLW1      23.00000000 W

===== CHANNEL f2 =====
SFO2      500.1330008 MHz
NUC2       1H
CPDPRG2   waltz16
PCPD2     80.00 usec
PLW2      13.50000000 W
PLW12     0.21094000 W
PLW13     0.13500000 W

F2 - Processing parameters
SI         131072
SF         125.7577754 MHz
WDW        EM
SSB        0
LB         1.00 Hz
GB         0
PC         1.40
    
```

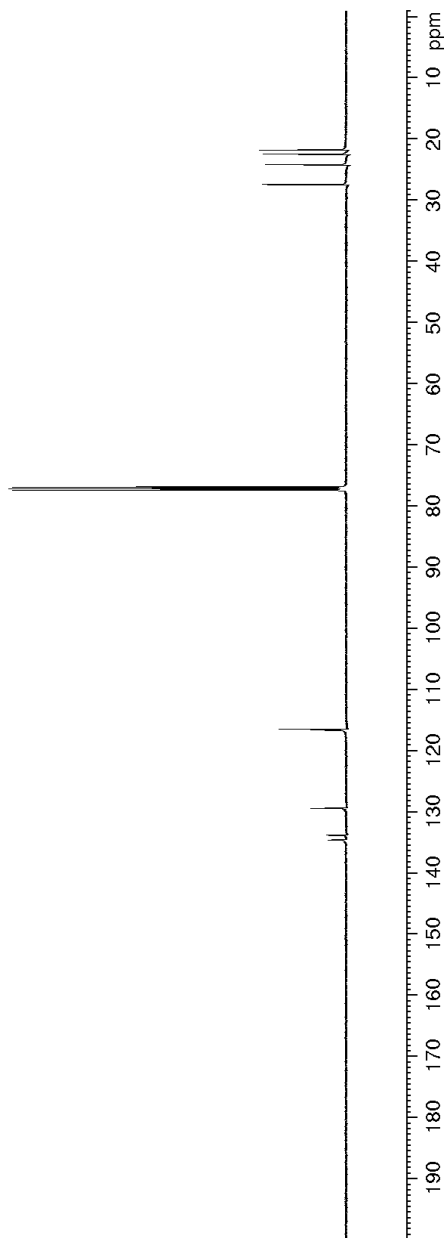

TCM-I-179C13

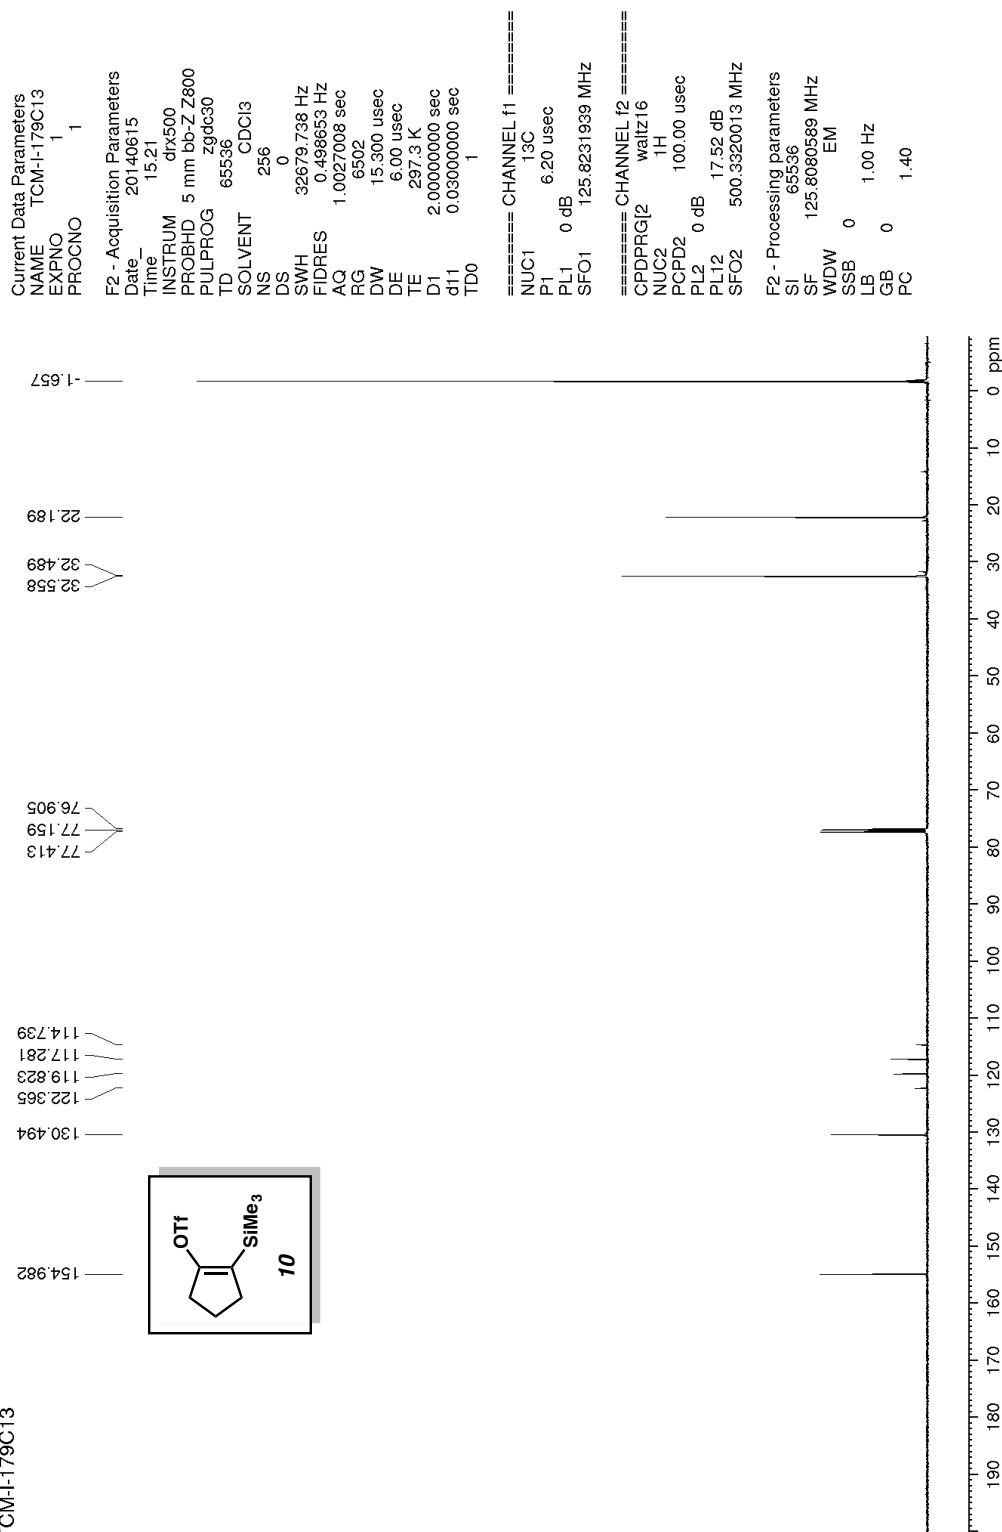



TCM-II-063C13

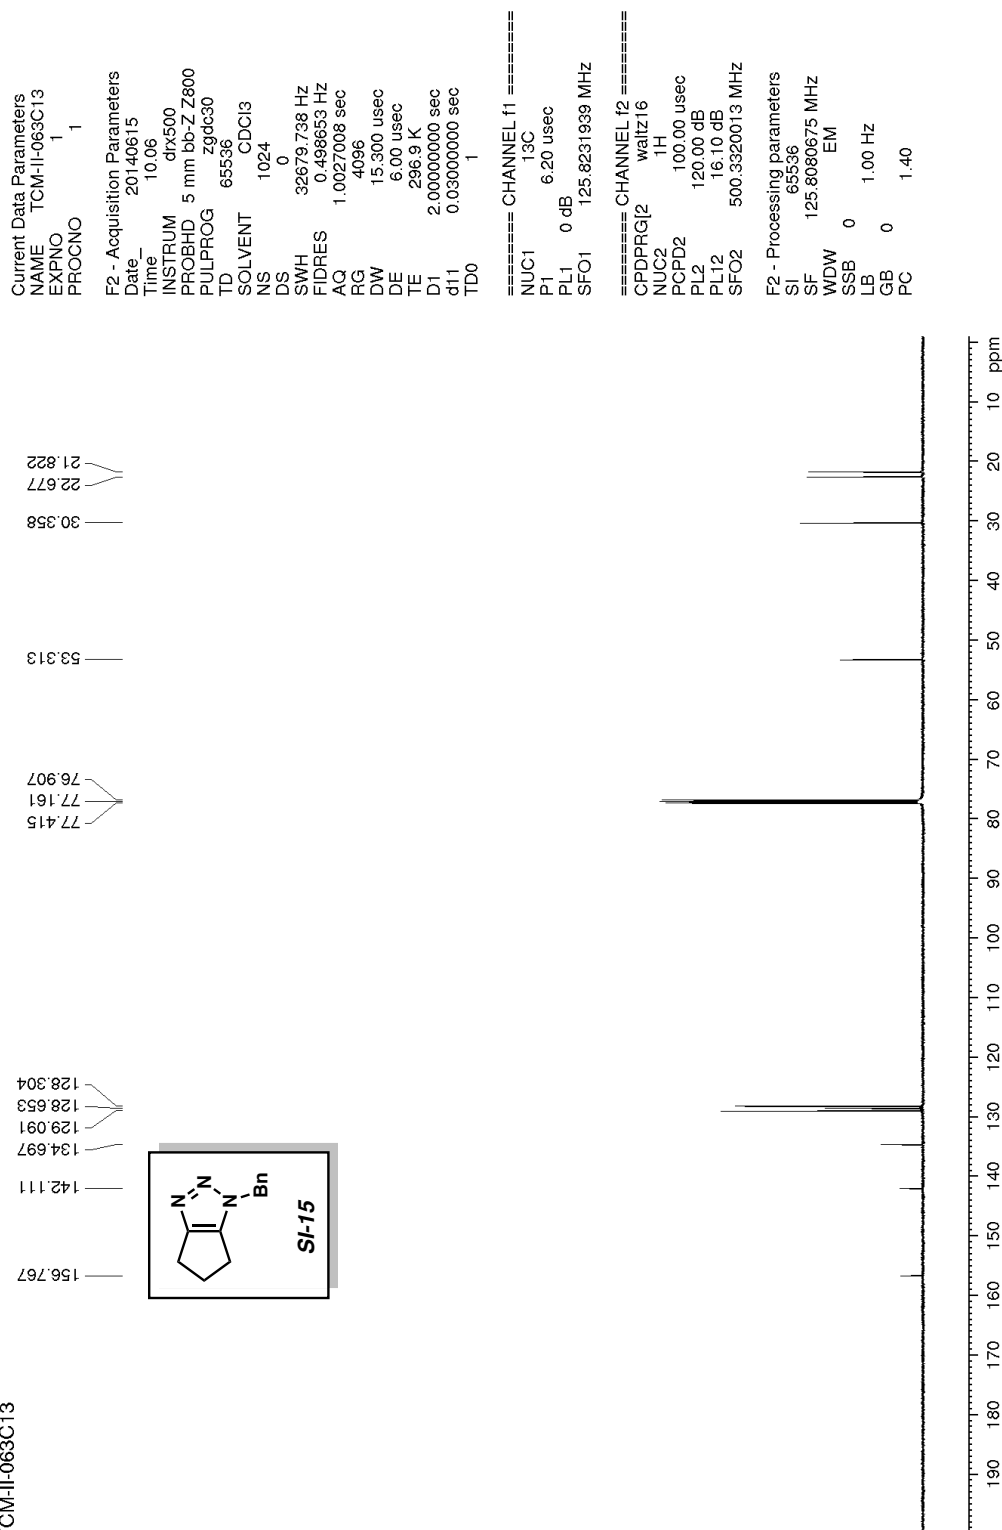

TCM-I-238C13

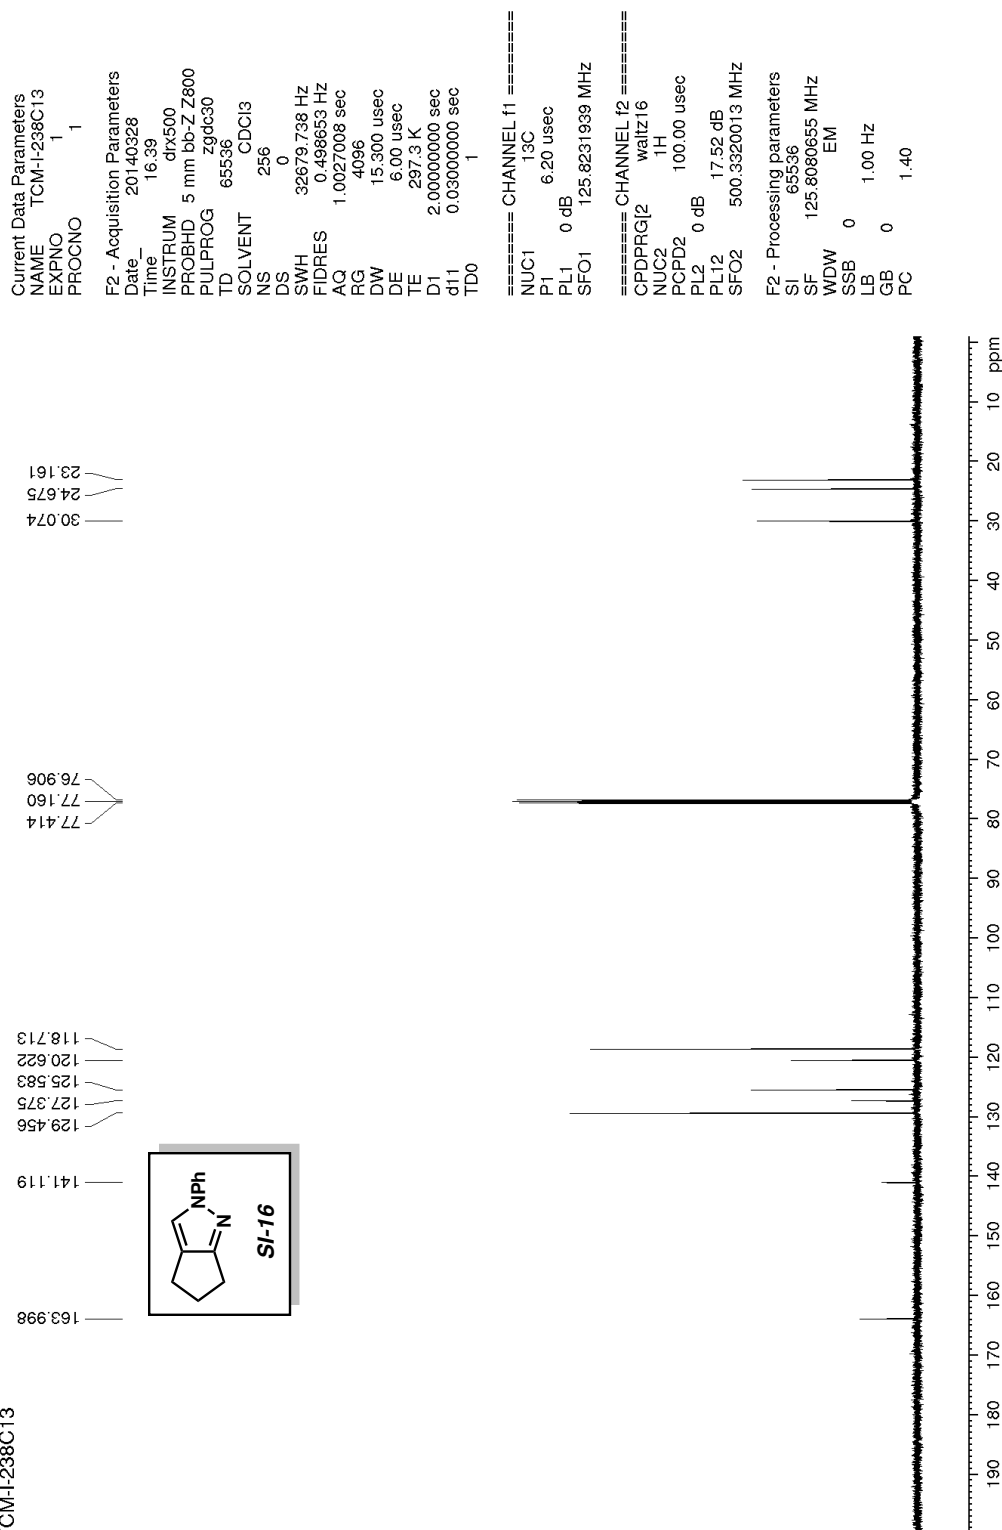

TCM-II-065C13

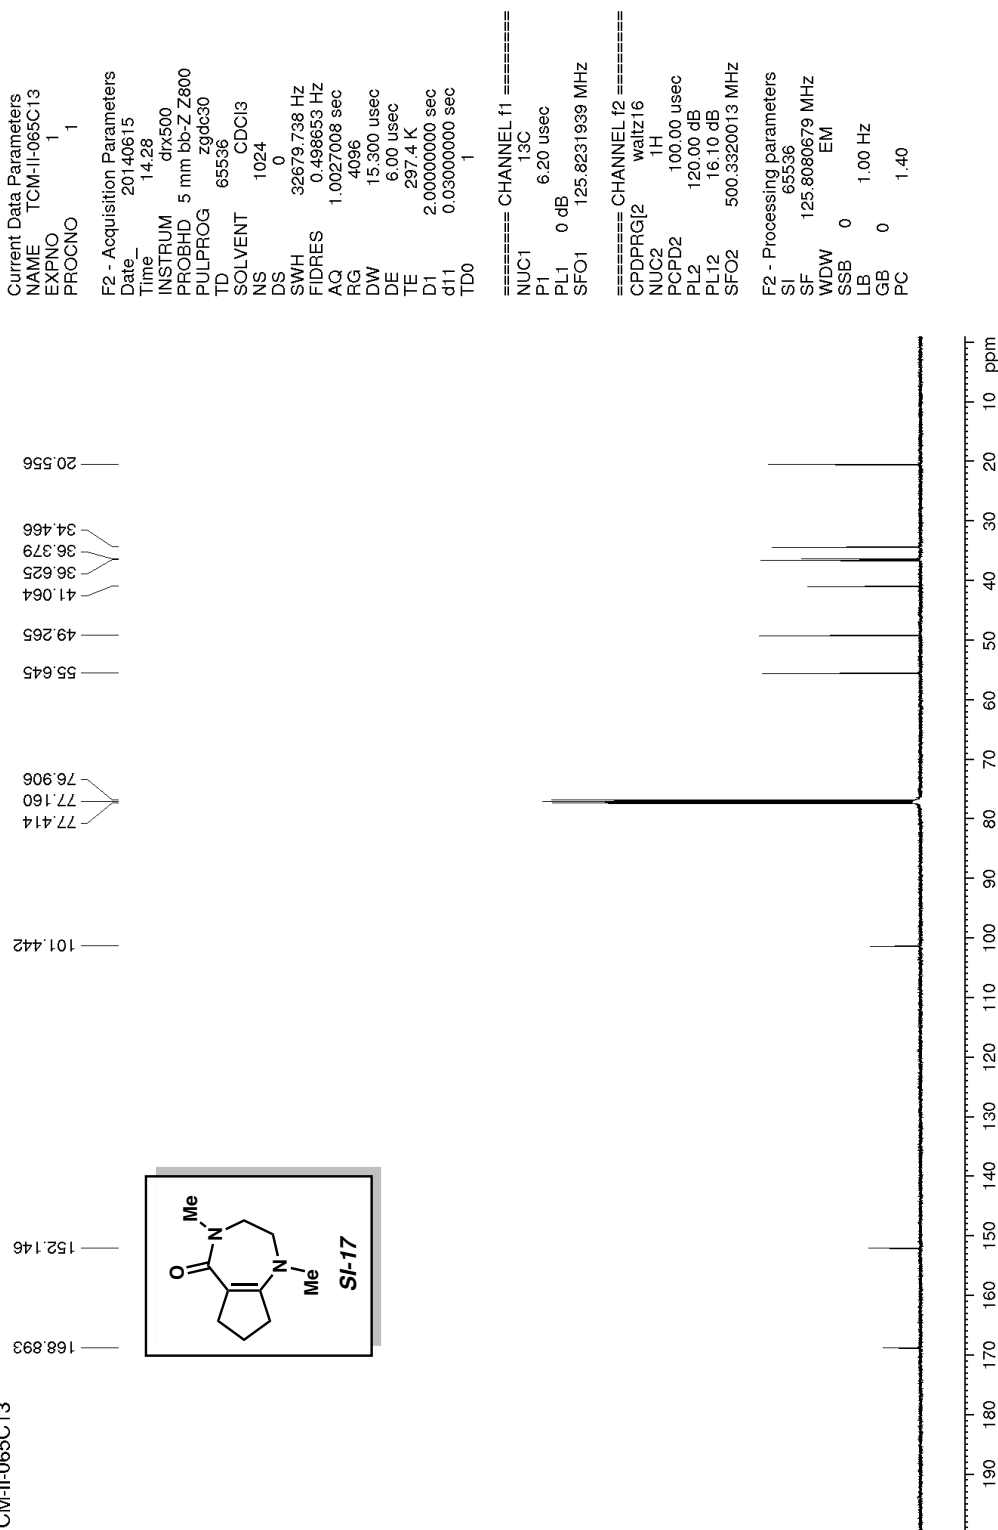

TCM-II-083C13

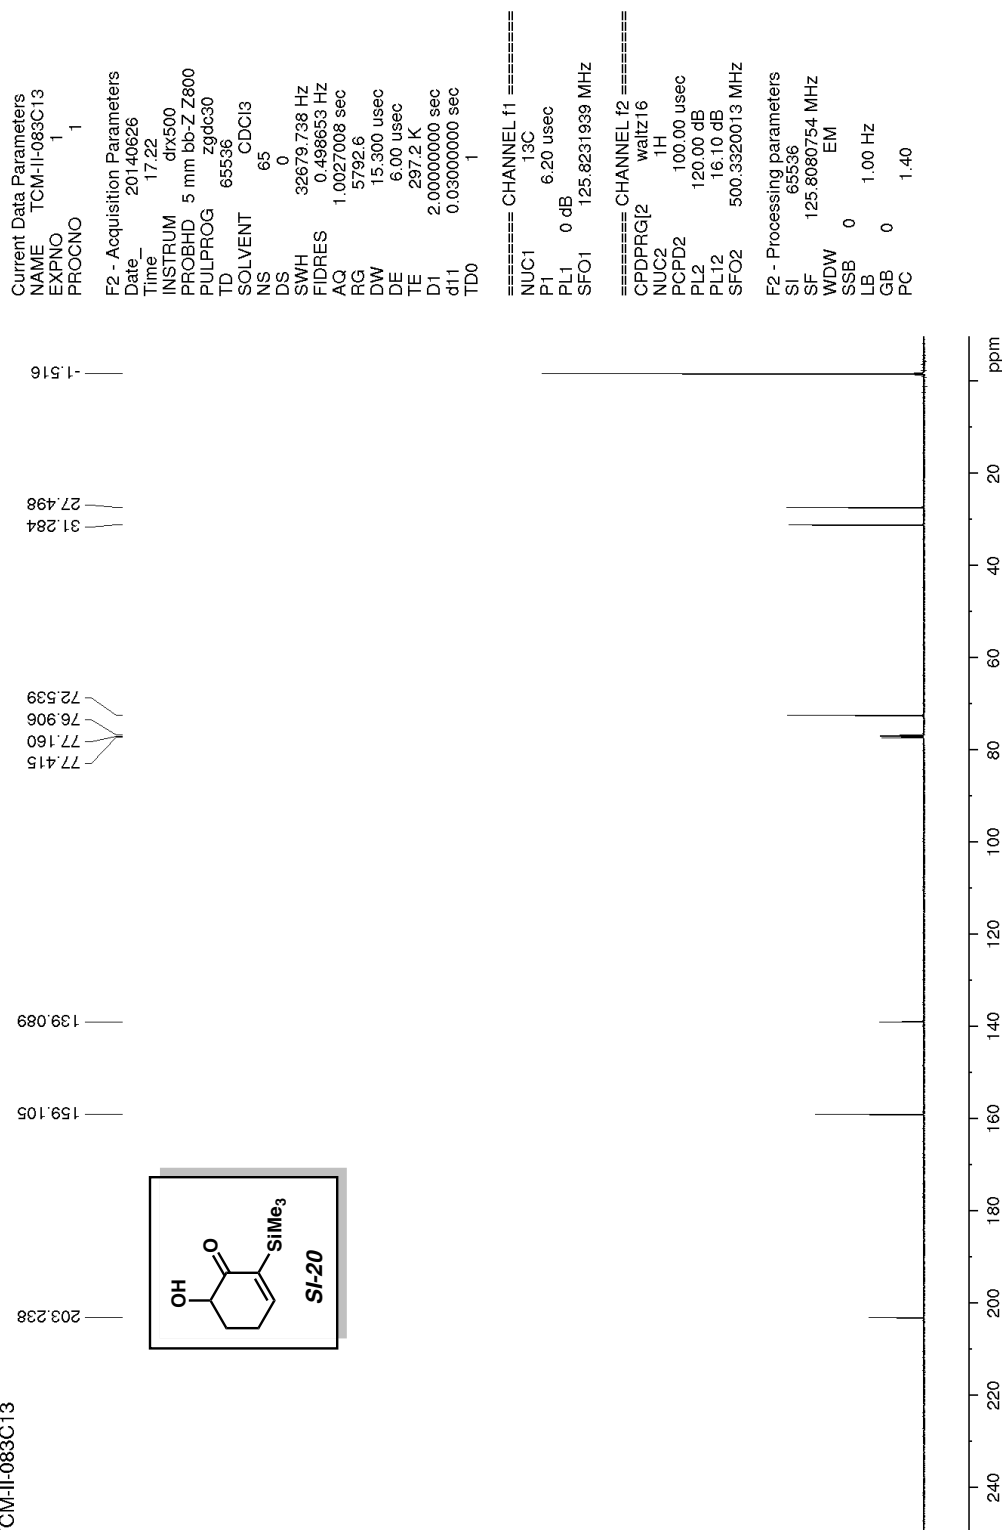



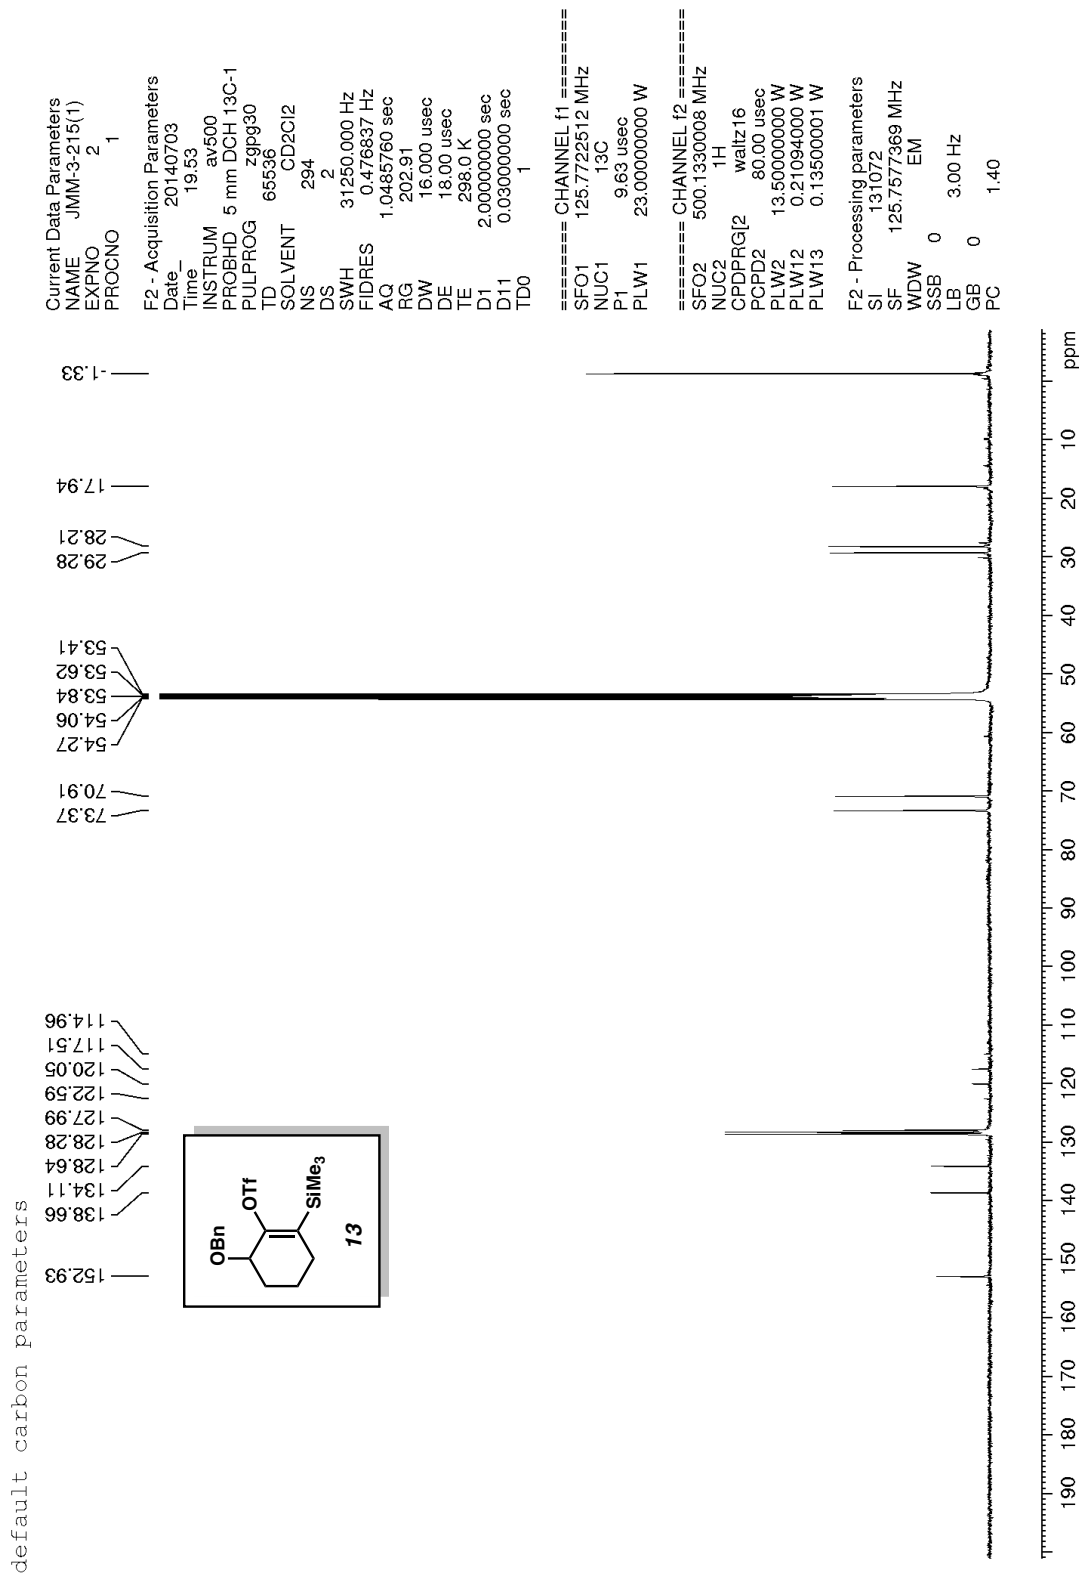

TCM-II-090C13

```

Current Data Parameters
NAME      TCM-II-090C13
EXPNO     1
PROCNO    1

F2 - Acquisition Parameters
Date_     20140706
Time      16.57
INSTRUM   dirx500
PROBHD    5 mm bb-Z Z800
PULPROG   zgpg30
TD         65536
SOLVENT   CDCl3
NS         64
DS         0
SWH        32679.738 Hz
FIDRES     0.498653 Hz
AQ         1.0027008 sec
RG         4096
DW         15.300 usec
DE         6.00 usec
TE         297.2 K
D1         2.00000000 sec
d11        0.03000000 sec
TD0        1

===== CHANNEL f1 =====
NUC1       13C
P1         6.20 usec
PL1        0 dB
SFO1       125.8231939 MHz

===== CHANNEL f2 =====
CPDPRG2    waltz16
NUC2       1H
PCPD2      100.00 usec
PL2        120.00 dB
PL12       16.10 dB
SFO2       500.3320013 MHz

F2 - Processing parameters
SI         65536
SF         125.8080969 MHz
WDW        EM
SSB        0
LB         1.00 Hz
GB         0
PC         1.40
    
```

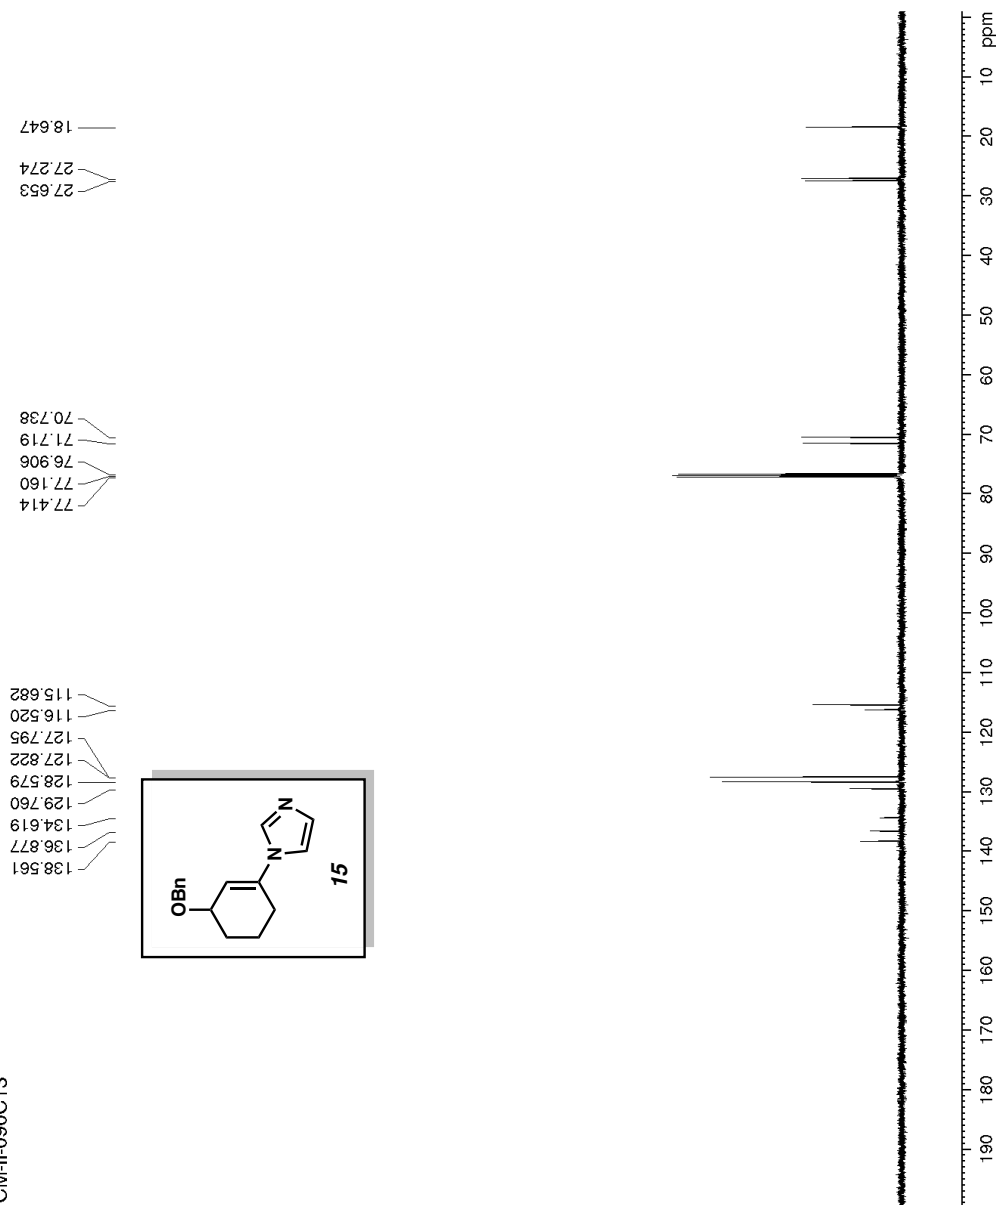





TCM-II-092F2C13

Current Data Parameters  
 NAME TCM-II-092F2C13  
 EXPNO 1  
 PROCNO 1

F2 - Acquisition Parameters  
 Date\_ 20140707  
 Time 11.27  
 INSTRUM dxt500  
 PROBHD 5 mm bb-Z Z800  
 PULPROG zgpg30  
 TD 65536  
 SOLVENT CDCl3  
 NS 512  
 DS 0  
 SWH 32679.738 Hz  
 FIDRES 0.498653 Hz  
 AQ 1.0027008 sec  
 RG 4096  
 DW 15.300 usec  
 DE 6.00 usec  
 TE 297.1 K  
 D1 2.00000000 sec  
 d11 0.03000000 sec  
 TD0 1

==== CHANNEL f1 =====  
 NUC1 13C  
 P1 6.20 usec  
 PL1 0 dB  
 SFO1 125.8231939 MHz

==== CHANNEL f2 =====  
 CPDPRG2 waltz16  
 NUC2 1H  
 PCPD2 100.00 usec  
 PL2 120.00 dB  
 PL12 16.10 dB  
 SFO2 500.3320013 MHz

F2 - Processing parameters  
 SI 65536  
 SF 125.8080645 MHz  
 WDW EM  
 SSB 0  
 LB 1.00 Hz  
 GB 0  
 PC 1.40

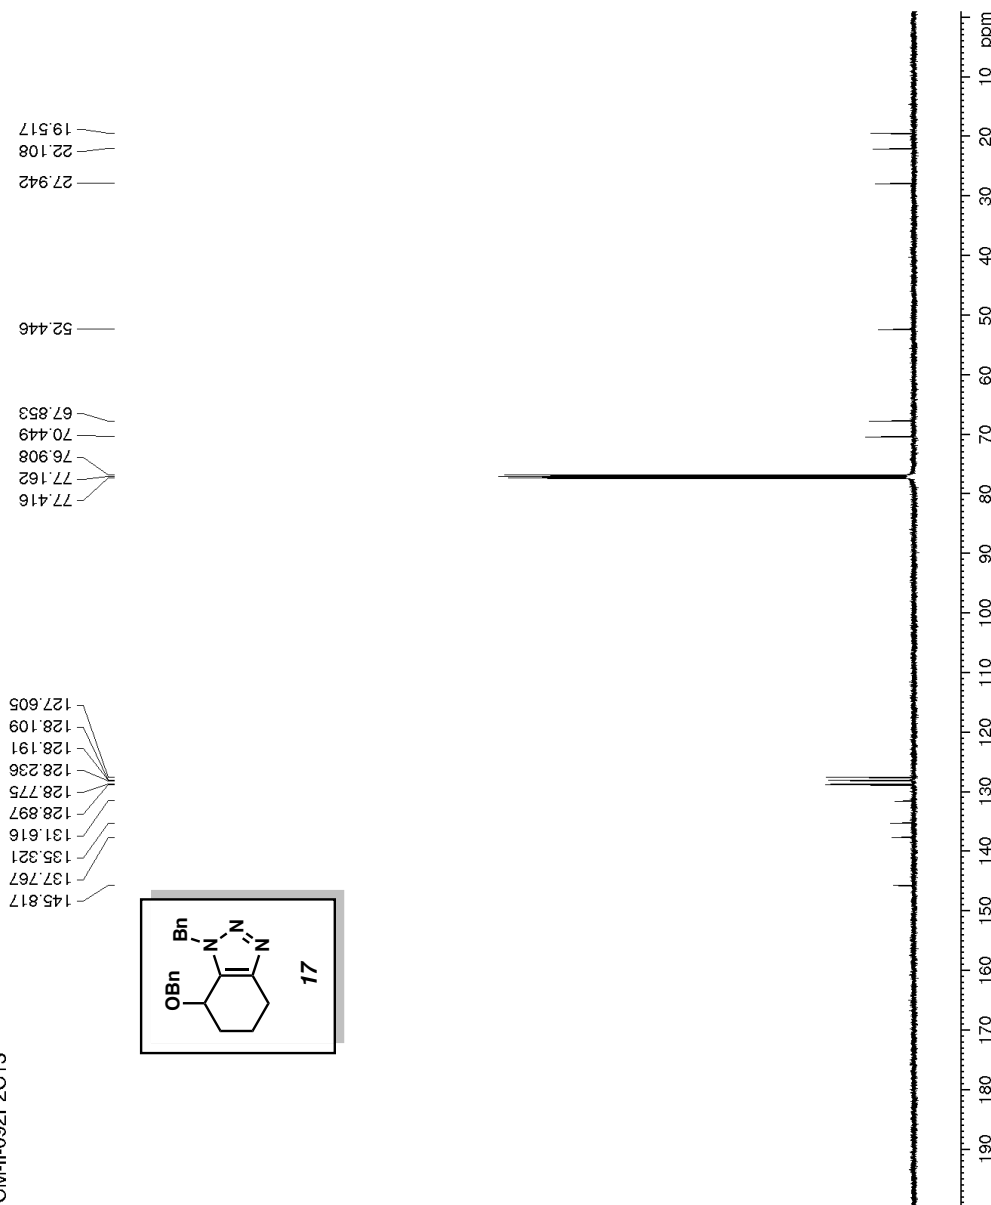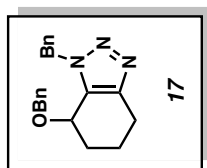

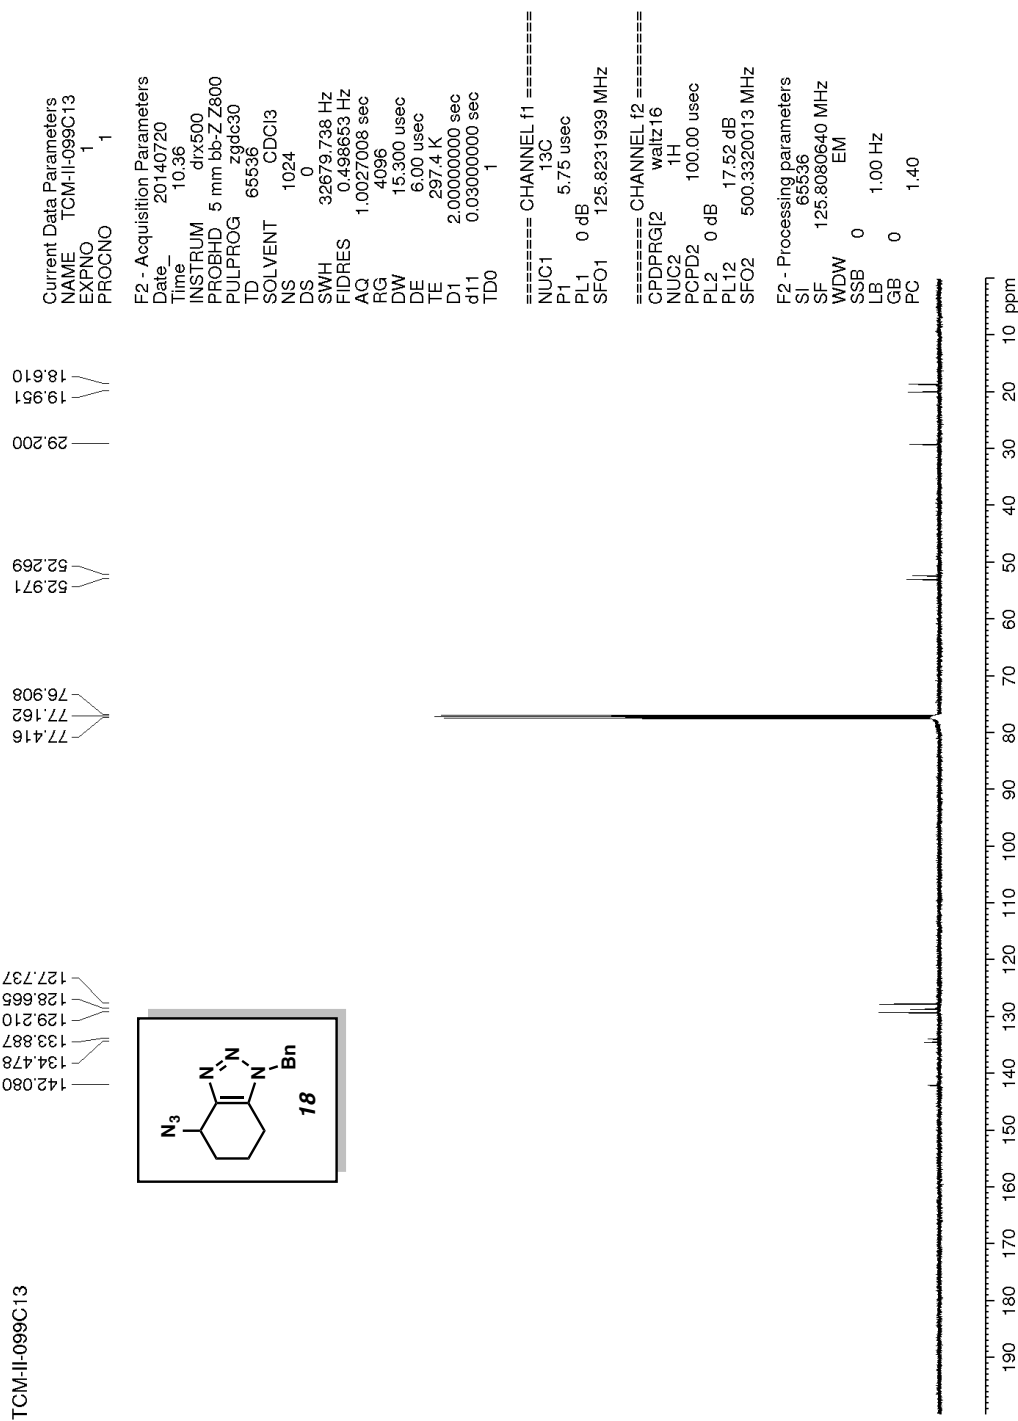

TCM-II-114C13

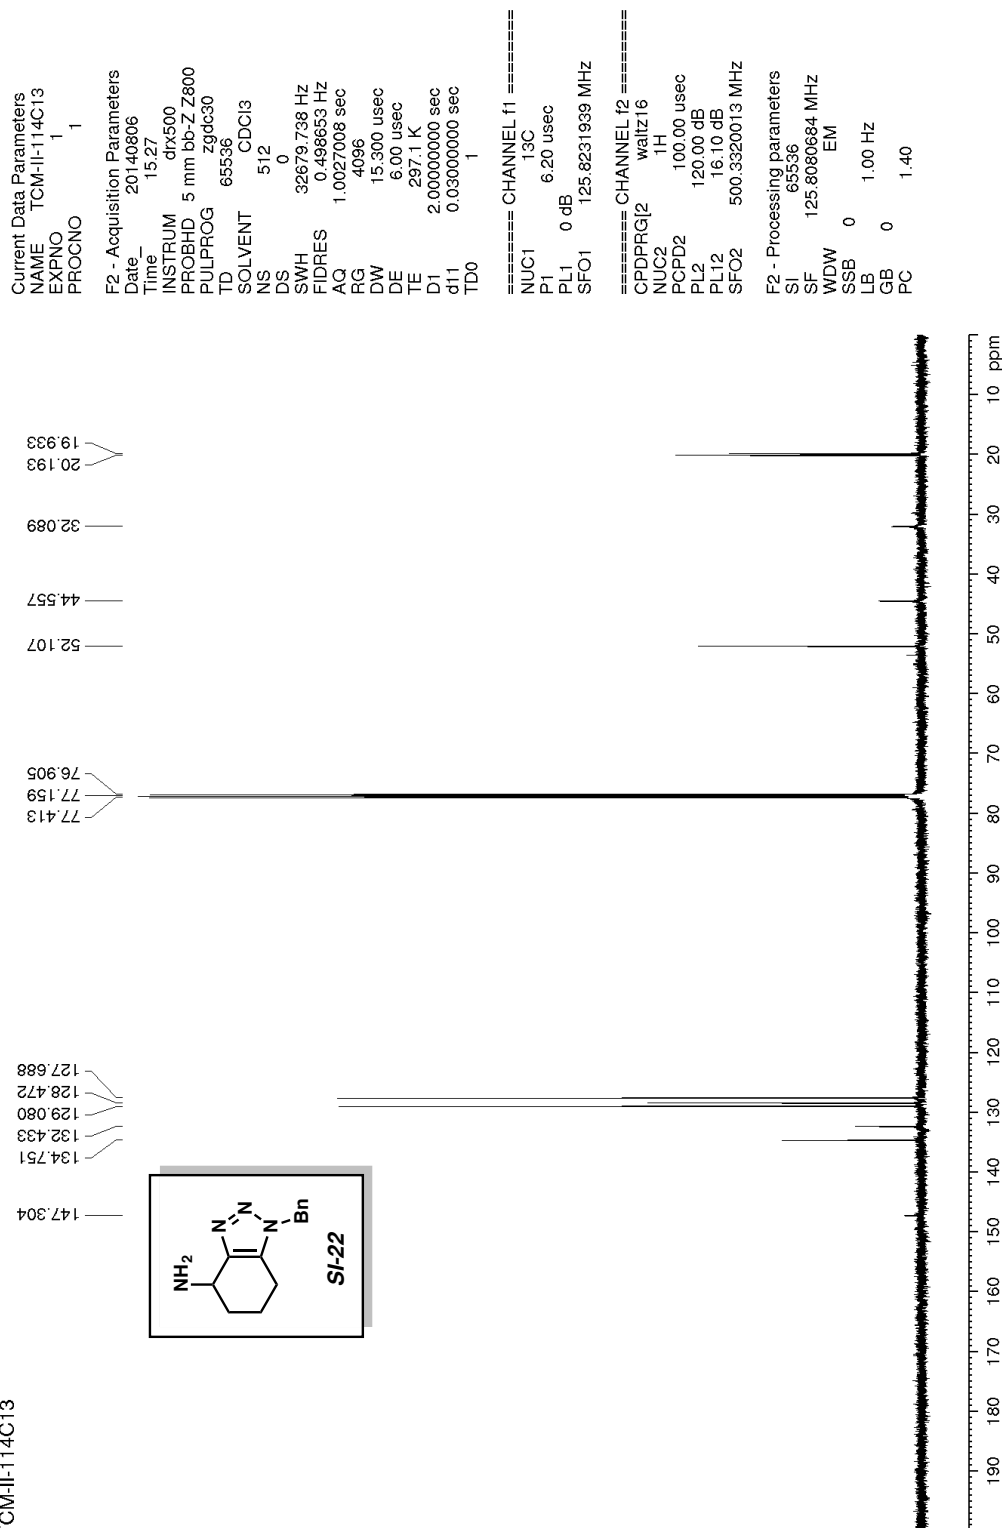

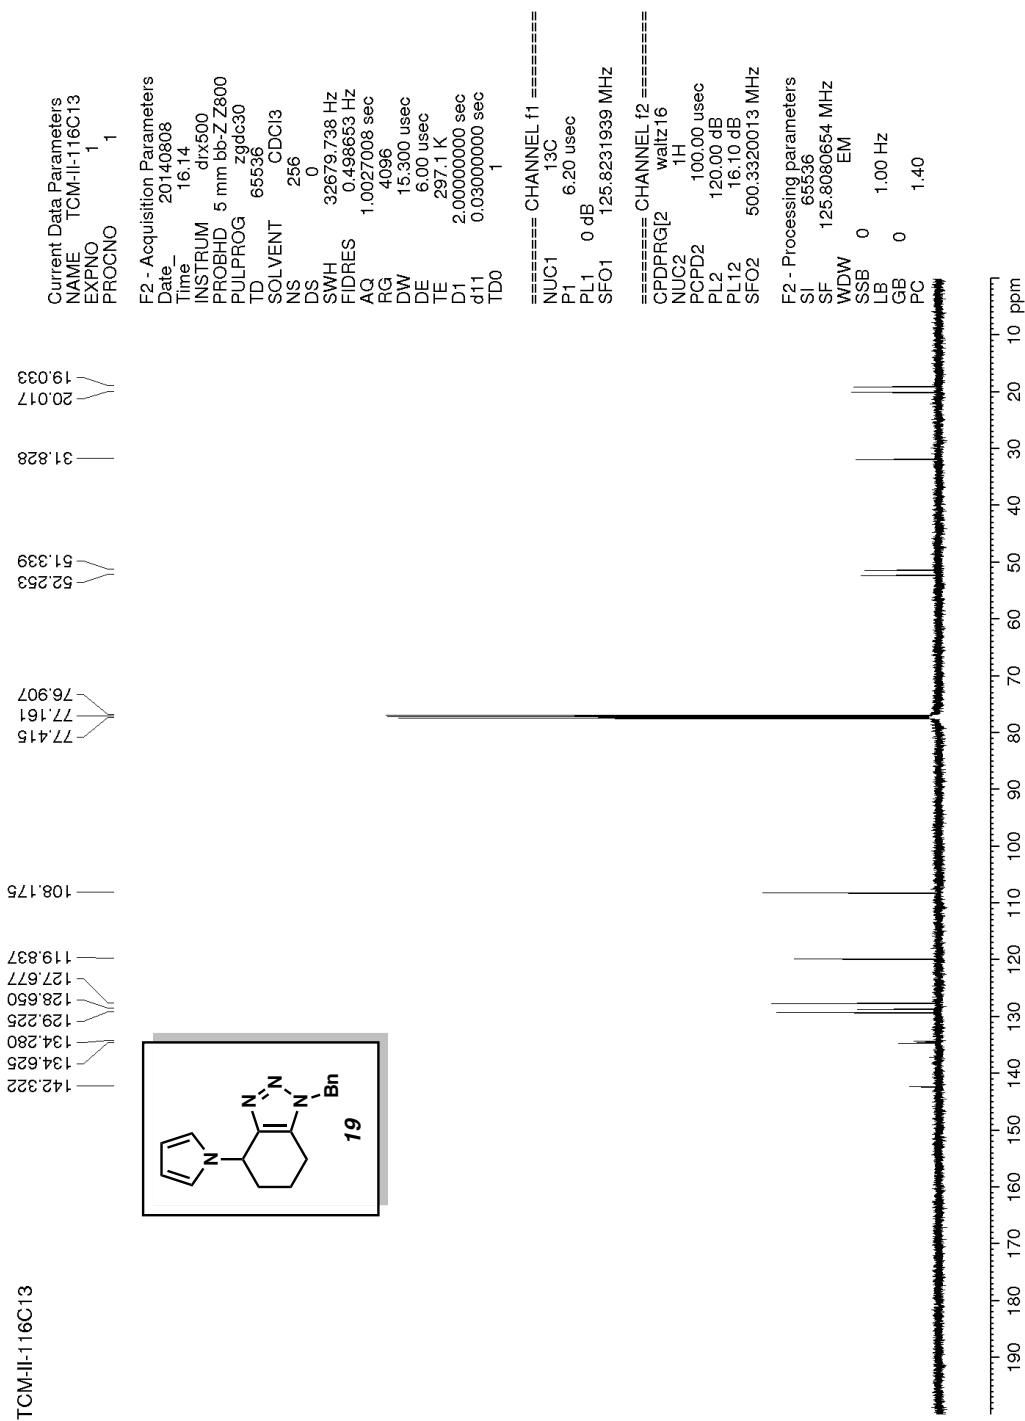

## References.

- <sup>1</sup> Devlin, A.S.; Du Bois, J. *Chem. Sci.* **2013**, *4*, 1059–1063.
- <sup>2</sup> Thoman, C. J.; Voaden, D. J. *Org. Synth.* **1965**, *45*, 96
- <sup>3</sup> Dubrovskiy, A. V.; Larock, R. C. *Org. Lett.* **2010**, *12*, 1180–1183.
- <sup>4</sup> Shih, C.; Fritzen, E. L.; Swenton, J. S. *J. Org. Chem.* **1980**, *45*, 4462–4471.
- <sup>5</sup> Zhao, Y.; Truhlar, D. *Theor. Chem. Acc.* **2008**, *120*, 215–241.
- <sup>6</sup> Gaussian 09, Revision D.1., Frisch, M. J.; Trucks, G. W.; Schlegel, H. B.; Scuseria, G. E.; Robb, M. A.; J. R. Cheeseman; Scalmani, G.; Barone, V.; Mennucci, B.; Petersson, G. A.; Nakatsuji, H.; Caricato, M.; Li, X.; Hratchian, H. P.; Izmaylov, A. F.; Bloino, J.; Zheng, G.; Sonnenberg, J. L.; Hada, M.; Ehara, M.; Toyota, K.; Fukuda, R.; Hasegawa, J.; Ishida, M.; Nakajima, T.; Honda, Y.; Kitao, O.; Nakai, H.; Vreven, T.; Montgomery, J. A.; Peralta, J. E.; Ogliaro, F.; Bearpark, M.; Heyd, J. J.; Brothers, E.; Kudin, K. N.; Staroverov, V. N.; Kobayashi, R.; Normand, J.; Raghavachari, K.; Rendell, A.; Burant, J. C.; Iyengar, S. S.; Tomasi, J.; Cossi, M.; Rega, N.; Millam, J. M.; Klene, M.; Knox, J. E.; Cross, J. B.; Bakken, V.; Adamo, C.; Jaramillo, J.; Gomperts, R.; Stratmann, R. E.; Yazyev, O.; Austin, A. J.; Cammi, R.; Pomelli, C.; Ochterski, J. W.; Martin, R. L.; Morokuma, K.; Zakrzewski, V. G.; Voth, G. A.; Salvador, P.; Dannenberg, J. J.; Dapprich, S.; Daniels, A. D.; Farkas, Ö.; Foresman, J. B.; Ortiz, J. V.; Cioslowski, J.; Fox, D. J. Gaussian, Inc., Wallingford CT, 2009.
- <sup>7</sup> (a) Gonzalez, C.; Schlegel, H. B. *J. Chem. Phys.* **1989**, *90*, 2154–2161. (b) Gonzalez, C.; Schlegel, H. B. *J. Phys. Chem.* **1990**, *94*, 5523–5527.
- <sup>8</sup> Scalmani, G.; Frisch, M. J. *J. Chem. Phys.* **2010**, *132*, 114110.
